1 ***De novo* draft assembly of the *Botrylloides leachii* genome**  
2 **provides further insight into tunicate evolution.**

3  
4 Simon Blanchoud<sup>1#</sup>, Kim Rutherford<sup>1</sup>, Lisa Zondag<sup>1</sup>, Neil J. Gemmell<sup>1</sup> and Megan J. Wilson<sup>1\*</sup>

5  
6 1 Department of Anatomy, School of Biomedical Sciences, University of Otago, P.O. Box 56,  
7 Dunedin 9054, New Zealand

8 # Current address: Department of Zoology, University of Fribourg, Switzerland

9  
10 \* Corresponding author:

11 Email: [meganj.wilson@otago.ac.nz](mailto:meganj.wilson@otago.ac.nz)

12 Ph. +64 3 4704695

13 Fax: +64 479 7254

14

15 **Keywords:** chordate, regeneration, *Botrylloides leachii*, ascidian, tunicate, genome, evolution

## 16 **Abstract (250 words)**

17           Tunicates are marine invertebrates that compose the closest phylogenetic group to the  
18 vertebrates. This chordate subphylum contains a particularly diverse range of reproductive  
19 methods, regenerative abilities and life-history strategies. Consequently, tunicates provide an  
20 extraordinary perspective into the emergence and diversity of chordate traits. To gain further  
21 insights into the evolution of the tunicate phylum, we have sequenced the genome of the  
22 colonial Stolidobranchian *Botrylloides leachii*.

23           We have produced a high-quality (90 % BUSCO genes) 159 Mb assembly, containing 82  
24 % of the predicted total 194 Mb genomic content. The *B. leachii* genome is much smaller than  
25 that of *Botryllus schlosseri* (725 Mb), but comparable to those of *Ciona robusta* and *Molgula*  
26 *oculata* (both 160 Mb). We performed an orthologous clustering between five tunicate  
27 genomes that highlights sets of genes specific to some species, including a large group unique  
28 to colonial ascidians with gene ontology terms including cell communication and immune  
29 response.

30           By analysing the structure and composition of the conserved gene clusters, we  
31 identified many examples of multiple cluster breaks and gene dispersion, suggesting that  
32 several lineage-specific genome rearrangements occurred during tunicate evolution. In  
33 addition, we investigate lineage-specific gene gain and loss within the Wnt, Notch and retinoic  
34 acid pathways. Such examples of genetic change within these highly evolutionary conserved  
35 pathways commonly associated with regeneration and development may underlie some of the  
36 diverse regenerative abilities observed in the tunicate subphylum. These results supports the  
37 widely held view that tunicate genomes are evolving particularly rapidly.

## 38 **Introduction**

39           Tunicates are a group of marine suspension-feeding hermaphrodites found worldwide  
40 in the inter- or sub-tidal region of the seas. This subphylum of invertebrates is part of the  
41 Chordata phylum, phylogenetically positioned between the more basal Cephalochordata and  
42 the higher Vertebrata, of which they are considered the closest relatives (Fig. 1A; (Delsuc et al.  
43 2006)). These organisms include a wide range of reproductive methods, regenerative abilities,  
44 developmental strategies and life cycles (Lemaire et al. 2008). Importantly, and despite a  
45 drastically different body plan during their adult life cycle, tunicates have a tissue complexity  
46 incipient to that of vertebrates (Fig. 1A), including a heart, a notochord, an endostyle and a  
47 vascular system (Millar 1971). In addition, this group of animals is undergoing rapid genomic  
48 evolution compared to higher vertebrates, with a greater nucleotide substitution rate  
49 observed in both their nuclear and mitochondrial genomes (Tsagkogeorga et al. 2010, 2012;  
50 Rubinstein et al. 2013; Berna and Alvarez-Valin 2014). Therefore, this chordate subphylum  
51 provides an excellent opportunity to study the origin of vertebrates, the emergence of clade  
52 specific traits and the function of conserved molecular mechanisms. Biological features that  
53 can be investigated in tunicates include, among others, the evolution of colonialism, neoteny,  
54 sessilness, and budding. However, there are currently only seven Tunicata genomes publicly  
55 available, of which three have been well annotated. There is thus a paucity in the sampling of  
56 this very diverse subphylum.

57           Tunicates are separated into seven orders contained in three classes (Fig. 1A):  
58 Appendicularia (order Copelata), Thaliacea (orders Pyrosomida, Salpida and Doliolida) and  
59 Ascidiacea (orders Aplousobranchia, Phlebobranchia and Stolidobranchia). Appendicularia is  
60 a class of planktonic free-swimming organisms that possess chordate traits common to all  
61 tunicate larvae including a notochord, neural tube and pharyngeal slits. These social neotenic  
62 animals form dioecious communities where each individual lives inside a special external

63 mucous structure, termed house, which concentrates and funnels their food. *Oikopleura dioica*  
64 is the sole example of the Appendicularian to have its genome sequenced, showing  
65 exceptional compaction (70 Mb; (Seo et al. 2001)). Whether these animals can undergo  
66 regeneration has not yet been assessed.

67 Thaliacea is an order of planktonic pelagic animals forming cylindrical free-floating  
68 compound colonies (Piette and Lemaire 2015). These organisms can reproduce both sexually,  
69 through autogamy to initiate novel colonies, as well as asexually, through stolonial budding to  
70 increase the size of the colony. Owing to their peculiar life cycle and habitat, these tunicates  
71 have not been extensively studied, no genome has been sequenced and whether they can  
72 undergo regeneration remains unknown.

73 Ascidiacea consist of both solitary and colonial sessile benthic organisms. Solitary  
74 ascidians (Phlebobranchian and some families among the Stolidobranchian) reproduce  
75 sexually, releasing eggs through their atrial siphon for external fertilization, hence producing  
76 a motile larva. These larvae will colonize novel environments, attach to a submersed substrate  
77 and undergo metamorphosis into a sessile filter-feeding adult. These ascidians are capable of  
78 regenerating a limited set of organs, including their oral siphon (Auger et al. 2010) although  
79 regeneration capability reduces as they age (Jeffery 2015). These are currently the most  
80 sampled of the tunicates with five published genomes (*Ciona robusta* [formerly known as *C.*  
81 *intestinalis* type A; (Brunetti et al. 2015; Gissi et al. 2017)], *Ciona savignyi*, *Molgula oculata*,  
82 *Molgula occulta*, *Molgula occidentalis*; (Dehal et al. 2002a; Small et al. 2007; Stolfi et al. 2014),  
83 two yet unpublished species (*Phallusia mamillata*, *Phallusia fumigata*; (Brozovic et al. 2016))  
84 and two currently being assembled (*Halocynthia rorezi*, *Halocynthia aurantium*; (Brozovic et  
85 al. 2016)).

86

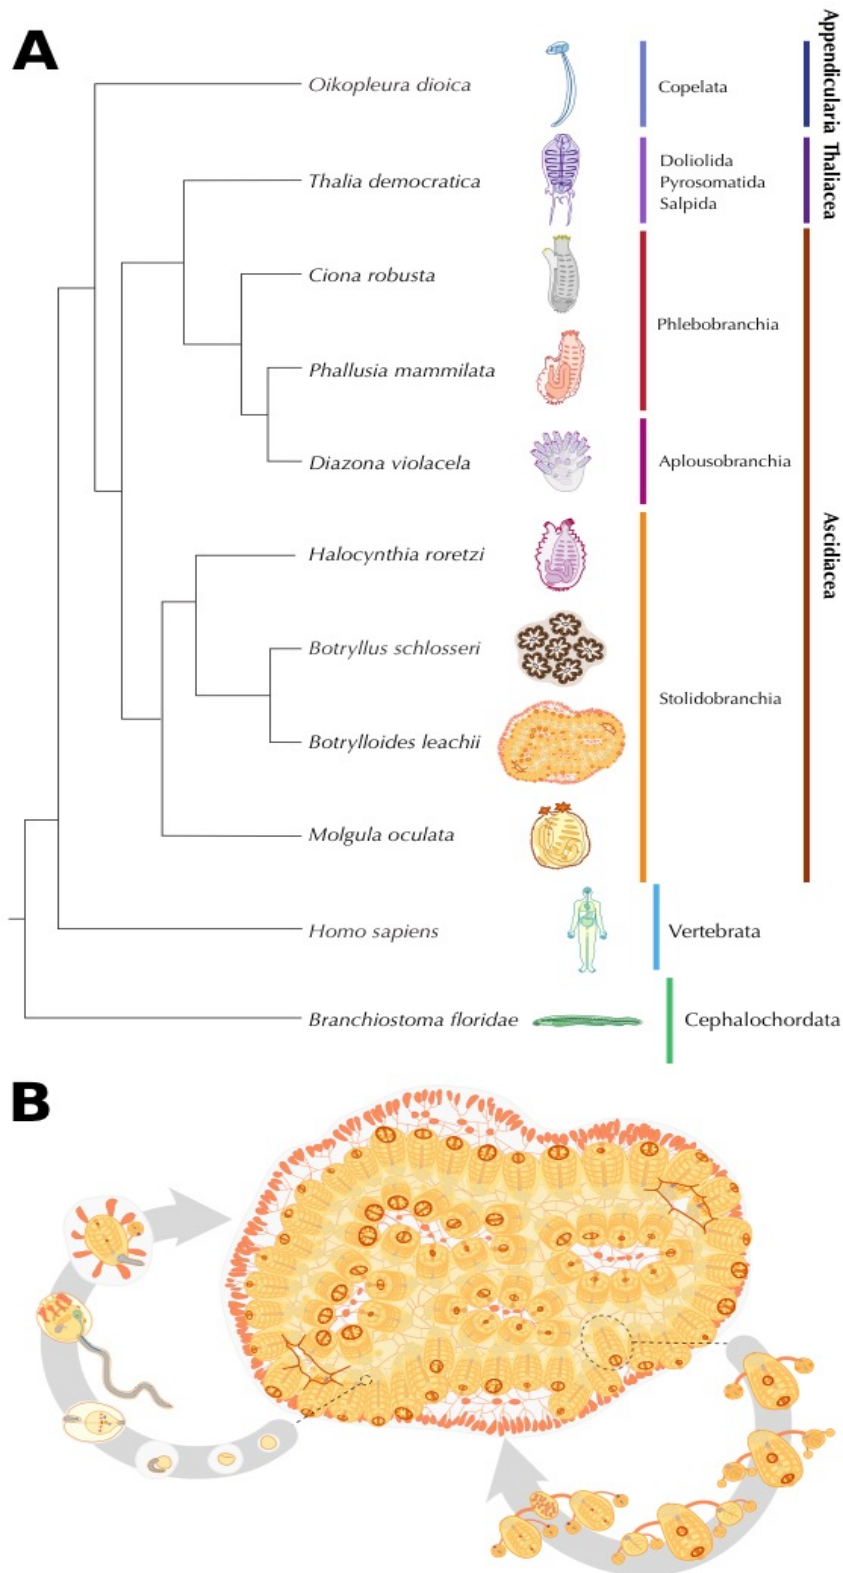

**Figure 1 *B. leachii* phylogenetic position and life cycle.**

**A.** Schematic showing phylogeny of tunicates with respect to the chordate clade. **B.** Life cycle of *B. leachii*. The colony expands and grows by asexual reproduction (right loop). During favourable conditions such as warmer water temperatures, members of the colonies start sexual reproduction (left loop). The embryos remain with the colony in brood pouches until release. Hatched larvae attach to nearby substrates and begin metamorphosis into a zooid.

88

89 Colonial tunicates (Aplousobranchian and some families among the Stolidobranchian)  
90 are capable of both sexual, through autogamy, and asexual reproduction, through a wide  
91 range of budding types (palleal, vascular, stolonial, pyloric and strobilation; (Brown and  
92 Swalla 2012)). In addition, these compound organisms can undergo whole-body regeneration  
93 (WBR; reviewed in (Kürn et al. 2011)). Colonial ascidians are emerging as unique and  
94 increasingly popular model organisms for a variety of studies including immunobiology,  
95 allorecognition, angiogenesis and WBR (Rinkevich et al. 1995; Ballarin et al. 2001; Rinkevich  
96 et al. 2007a; Manni et al. 2007; Gasparini et al. 2008; Franchi et al. 2011; Lauzon et al. 2013;  
97 Rinkevich et al. 2013). However, colonial tunicates were only represented by *Botryllus*  
98 *schlosseri*, an ascidian that shows a significant expansion of its genome size when compared to  
99 the other available Tunicata genomes (725 Mb). To further investigate this fascinating  
100 subphylum and assess whether genome expansion is a prerequisite for coloniality and WBR,  
101 we have assembled and analysed the genome sequence of *Botrylloides leachii* (class  
102 Ascidiacea, order Stolidobranchia; (Savigny 1816)).

103 The viviparous colonial ascidian *B. leachii* can reproduce sexually through a tadpole  
104 stage that allows the settlement of a novel colony onto a new substrate (Fig. 1B). Each colony  
105 is composed of genetically identical adults (termed zooids) organized in ladder-like systems  
106 and embedded in gelatinous matrix (tunic). While each adult has its own heart, they all share  
107 a common vascular system embedded within the tunic. In the presence of sufficient food  
108 supply, the size of the colony doubles approximately every 20 days through synchronized  
109 asexual reproduction, known as palleal budding. During this process each adult produces two  
110 daughter zooids that ultimately replace the mother, which is then resorbed by the colony. In  
111 addition, upon loss of all zooids from the colony, *B. leachii* can undergo whole-body  
112 regeneration and restore a single fully-functional adult in as little as 10 days from a small

113 piece of its vascular system (Rinkevich et al. 1995). Furthermore, when facing unfavourable  
114 environmental conditions, these colonial tunicates can enter into hibernation, whereby all  
115 zooids undergo regression and are resorbed by the remaining vascular system. When a  
116 favourable environment is restored, mature adults will be restored to re-establish the colony  
117 (Burighel et al. 1976).

118         We have assembled and annotated the first *de novo* draft genome of the *B. leachii* by  
119 taking advantage of our recently published transcriptomes (Zondag et al. 2016). Using this  
120 genome, we have then undertaken a large-scale comparison of the four best-annotated  
121 ascidian genomes (*B. schlosseri*, *C. robusta*, *M. oculata* and *O. dioica*) to gain insights into some  
122 of the diverse biological abilities that have evolved within the Tunicata.

## 123 **Results**

124

### 125 ***Genome assembly and annotation***

126 To minimize contamination from marine algae and bacteria typically present in the  
127 pharyngeal basket of feeding *B. leachii*, we isolated genomic DNA from embryos of a single  
128 wild *B. leachii* colony. Genomic DNA was used to produce two libraries: one short-range  
129 consisting of 19,090,212 fragments (300 bp) of which 100 bp were paired-end sequenced -  
130 important for obtaining high coverage - and a second long-range mate pair with 31,780,788  
131 fragments (1.5 - 15 kb size range, median ~3 kb) of which 250 bp were paired-end sequenced  
132 - important for scaffolding the assembly. Following quality checks, low quality reads were  
133 removed and sequencing adaptors were trimmed, thus resulting in a high-quality dataset of  
134 86,644,308 paired-end and 12,112,004 single-end sequences (100 % with a mean Phred score  
135  $\geq 30$ ,  $< 1$  % with an adapter sequence, Fig. S1).

136 We then followed a reference-free genome characterization (Simpson 2014); provided  
137 with statistics from the human, fish (*Maylandia zebra*; (Bradnam et al. 2013)), bird  
138 (*Melopsittacus undulatus*; (Bradnam et al. 2013)) and oyster (*Crassostrea gigas*, (Zhang et al.  
139 2012)) genomes for comparison; to estimate three properties of the *B. leachii* genome. First,  
140 k-mer count statistics were used to estimate the genome size to be 194.2 Mb (194,153,277  
141 bp). This size is similar to that of the solitary *C. robusta*, *C. savigny* and *M. oculata* (160 Mb,  
142 190 Mb and 160 Mb, respectively; (Dehal et al. 2002a; Small et al. 2007; Stolfi et al. 2014),  
143 larger than the compacted 70 Mb genome of *O. dioica* but appreciably smaller than the  
144 predicted 725 Mb genome of the related colonial ascidian *B. schlosseri*, of which 580 Mb have  
145 been sequenced (Voskoboynik et al. 2013a). Second, by quantifying the structure of the de  
146 Bruijn graph obtained using the k-mer counts, the computational complexity of the assembly



147 was estimated (sequencing errors 1/213, allelic differences 1/233, genomic repeats 1/2,439).  
148 With a cumulative occurrence of 1/106, the *B. leachii* genome is similar to that of bird, more  
149 variable than those of fish and human, but still quite less complex than the notably difficult  
150 oyster genome (Fig. S1). Third, sequence coverage was estimated using the distribution of 51-  
151 mers counts, showing a well-separated bimodal distribution with a true-genomic k-mers  
152 maximum at 31x coverage, similar to the human genome but higher than both the fish and the  
153 bird. Overall, these metrics suggest that *B. leachii* has a genome well suited for *de novo*  
154 assembly and that our sequencing could result in a high quality assembly.

155 *De novo* assembly using Metassembler (Wences and Schatz 2015) produced a genome  
156 of 159,132,706 bp (estimated percentage of genome assembled is 82 %), with an average  
157 sequencing coverage of 66x (after adaptor trimming). The assembly is composed of 1,778  
158 scaffolds, with a N50 scaffold length of 209,776 and a L50 scaffold count of 223. The 7,783  
159 contigs, with a N50 length of 48,085, and a L50 count of 781, represent a total size of  
160 146,061,259 (92 %, Table 1). To evaluate the completeness of our assembly, we used the  
161 Benchmarking Universal Single-Copy Orthologs (BUSCO; (Simão et al. 2015)). This tool  
162 provides a quantitative measure of genome completeness by verifying the presence of a set of  
163 manually curated and highly conserved genes. Out of the 843 orthologs selected in metazoans,  
164 760 (90 %) were found in our assembly of the *B. leachii* genome (File S1), a relatively high  
165 score when compared to the BUSCO score of frequently used genome assemblies such as  
166 *Homo sapiens* (89 %, GCA\_000001405.15). In addition, we took advantage of our previous  
167 assembly of the *B. leachii* transcriptome (Zondag et al. 2016) to further assess the quality of  
168 our genome. Using BLAT (Kent 2002), we were able to map 93 % of transcript sequences  
169 (48,510/52,004) onto our assembly. Overall, these results indicate that our *de novo* genome is  
170 largely complete and suitable for annotation.

171 **Table 1. *B. leachii* genome assembly statistics**

172

|                                                                                                 |                |
|-------------------------------------------------------------------------------------------------|----------------|
| <b>Total length of assembly</b>                                                                 | 159,132,706 bp |
| <b>Predicted genome size</b>                                                                    | 194 Mb         |
| <b>Number of scaffolds</b>                                                                      | 1,778          |
| <b>Median scaffold length</b>                                                                   | 43,485 bp      |
| <b>N50 contig length</b>                                                                        | 209,776 bp     |
| <b>Estimated genome coverage before adaptor trimming</b>                                        | 101x           |
| <b>Estimated genome coverage after adaptor trimming</b>                                         | 66x            |
| <b>Number of predicted genes</b>                                                                | 15,839         |
| <b>% of the <i>B. leachii</i> reference transcriptome aligning to the genome</b>                | 80 %           |
| <b>% of <i>Ciona</i> proteins that have a significant match to the <i>B. leachii</i> genome</b> | 71%            |
| <b>BUSCO score</b>                                                                              | 90 % (760/843) |

173

174 *Ab initio* genome annotation was performed using MAKER2 (Holt and Yandell 2011)  
175 and predicted 15,839 coding genes, of which 13,507 could be classified using InterProScan  
176 (Jones et al. 2014). Comparing these predictions with our mapping of the transcriptome, we  
177 found out that 83 % of our aligned cDNA (40,188/48,510) mapped to a predicted gene locus  
178 thus spanning 78 % of the annotated genes (12,395/15,839). In addition, a total of 4,213 non-  
179 coding sequences were predicted using Infernal (Nawrocki and Eddy 2013), Snoscan (Lowe  
180 1999) and tRNAscan-SE (Lowe 1999). Finally, repetitive elements were annotated using  
181 RepeatMasker (Smit et al. 2015) and a species-specific library created using the  
182 RepeatModeler module (Smit and Hubley 2015). Eighteen percent of the genome was  
183 identified as containing repetitive elements (Table 2 and Table S1), a majority (17%) of these  
184 being interspersed repeats. This proportion is similar to that found in other tunicates  
185 including *C. robusta* (17%), *M. oculata* (22%) and *O. dioica* (15%), while being lower than that  
186 in *B. schlosseri* (60%).

187 To further characterize the genome of *B. leachii*, we set out to compare it to four  
188 available Tunicata genomes. First, we quantified the number of sequences from their  
189 proteomes which mapped onto our assembly using tBLASTn (Camacho et al. 2009): *C. robusta*  
190 71% (10,507/14,740), *M. oculata* 77 % (12,788 / 16,616), *B. schlosseri* 71 % (32,944/ 46,519)  
191 but only 30% for *O. dioica* (9,009/29,572). Secondly, we performed an all-to-all search for  
192 protein orthologs using the OrthoMCL clustering approach (Li et al. 2003) to identify any

193 orthologs between the tunicate genomes (Fig. 2A). Clustering the combined protein set from  
 194 all five genomes resulted in 17,710 orthologous groups. By classifying each group based on  
 195 which tunicate has proteins in it, we identified the presence of five larger set of orthologs:  
 196 those shared by all species (17% of all groups), those shared by all sessile tunicates (11%),  
 197 those between the two colonial species (11%) and two groups unique to *B. schlosseri* and *O.*  
 198 *dioica* (15 % and 12 %, respectively; Fig. 2A). Thirdly, the proteins specific to an organism  
 199 were removed from the corresponding proteome, and a new mapping to the *B. leachii* genome  
 200 was performed. Mapping of the proteome using only the conserved sequences is 93 % for *B.*  
 201 *schlosseri* and 45 % for *O. dioica*.

202

203 **Table 2. Comparison of sequenced tunicate genomes and their most prominent biological features.**

|                                   | <i>Ciona robusta</i>  | <i>Botrylloides leachii</i>   | <i>Botryllus schlosseri</i>  | <i>Oikopleura dioica</i> | <i>Molgula oculata</i> |
|-----------------------------------|-----------------------|-------------------------------|------------------------------|--------------------------|------------------------|
| <b>Genome size</b>                | 160 Mb                | 194 Mb                        | 725 Mb                       | 72 Mb                    | 160 Mb                 |
| <b>Number of sequences</b>        | 4,390                 | 1,778                         | 121,094                      | 1,260                    | 10,554                 |
| <b>Fraction of repetitive DNA</b> | 17%                   | 18%                           | 60%                          | 15%                      | 22%                    |
| <b>Predicted gene number</b>      | 16,671                | 15,839                        | 27,463                       | 16,749                   | 15,313                 |
| <b>GC content</b>                 | 36%                   | 41%                           | 41%                          | 40%                      | 36%                    |
| <b>Body structure</b>             | solitary, sessile     | colony, sessile               | colony, sessile              | solitary, motile         | solitary, sessile      |
| <b>Reproduction</b>               | sexual, hermaphrodite | asexual sexual, hermaphrodite | asexual sexual hermaphrodite | sexual, separate sexes   | sexual, hermaphrodite  |
| <b>Regenerative ability</b>       | specific organs       | WBR                           | WBR                          | unknown                  | unknown                |

204

205 To get insights into the potential biological function underlying these ortholog groups,  
 206 we analysed the distribution of Gene Ontology (GO) terms for each cluster (Fig. S2).  
 207 Interestingly, an important fraction of the shared orthologs are related to G-protein signalling,  
 208 a conserved family of proteins involved in a variety of transduction mechanisms (Iwasa et al.  
 209 2003; Philips et al. 2003; Murata et al. 2001). Additionally, given that these proteins are  
 210 potentially novel to colonial tunicates, a cross-species approach for GO enrichment was

211 performed using the Human GO database as background (Fig. 2B, (Primmer et al. 2013)).  
212 Finally, we compared the composition of GO terms at the genomic level (Fig. 2C). Despite *B.*  
213 *schlosseri* having a larger predicted gene number compared to the other analyzed tunicates,  
214 the overall proportion of GO groups terms were distributed similar between all genomes (Fig.  
215 2C), indicating no expansion of one particular functional group in *B. schlosseri*. Overall, these  
216 analyses showed that our assembly and annotation is consistent with the other tunicate  
217 genomes and provides novel insights into their shared mechanisms and potentially for  
218 evolutionarily conserved mechanisms as well.

219  
220

**Figure 2 (Following page). Comparison of the tunicate genomes.**

**A.** Clustering of orthologous protein sequences. Indicated are the number of cluster groups, each of which contains at least two proteins. **B.** Treemap representation of the overrepresented GO Biological Processes terms within the ortholog groups shared between *B. leachii* and *B. schlosseri* genomes but not with *C. robusta*, *O. dioica* and *M. oculata*. Each rectangle size is proportional to the p-value for the GO term. **C.** Distribution of the three classes of GO terms for each species. The color-codes (left) are common for the entire row.

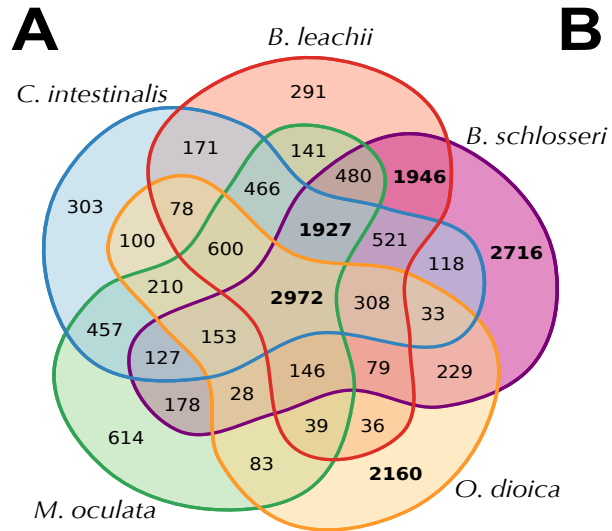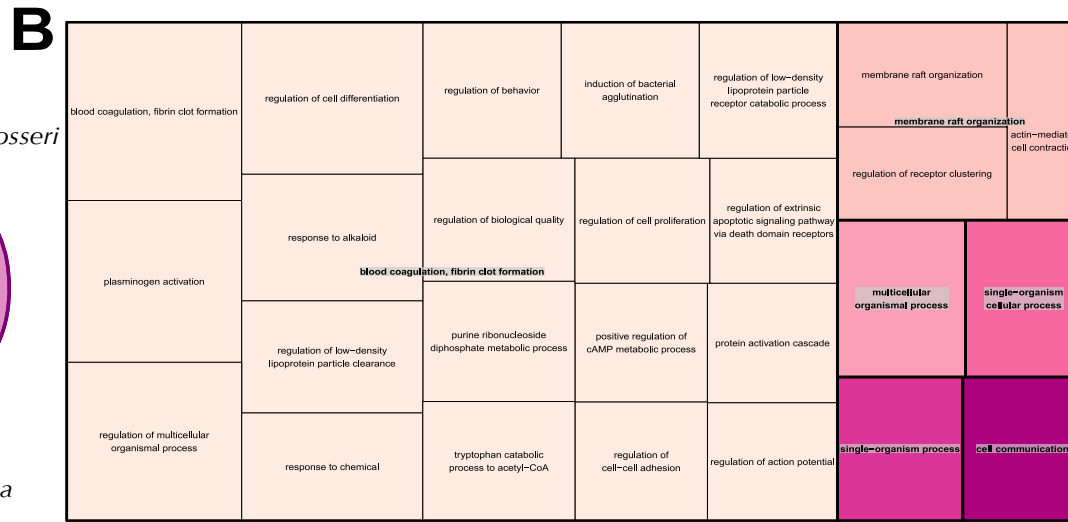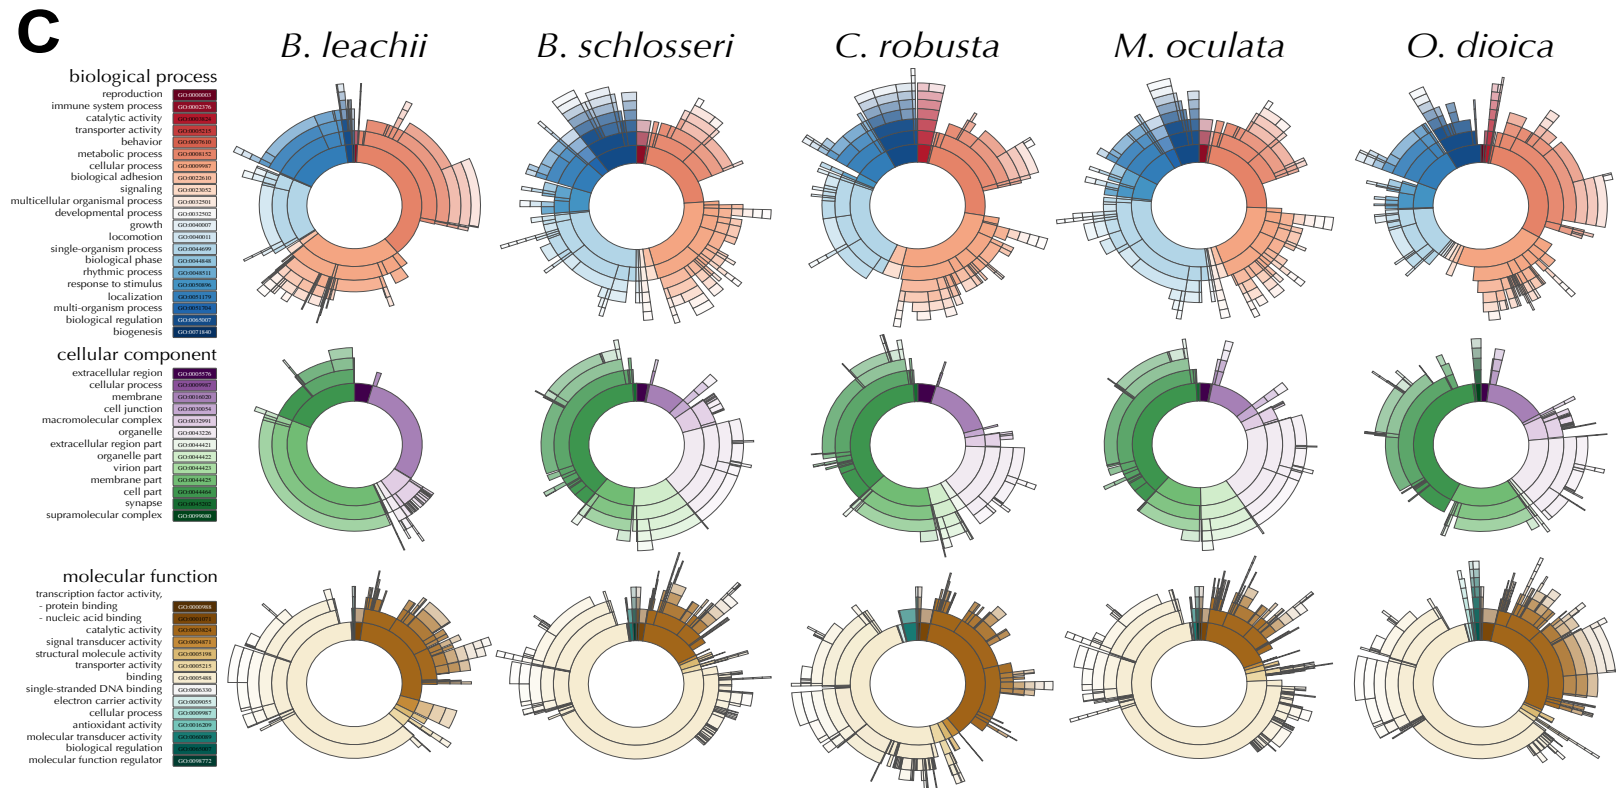

221 ***Ancient gene linkages are fragmented in tunicate genomes***

222

223 Ancient gene linkages are highly conserved sets of genes that are spatially restricted,  
224 commonly occurring in clusters (Garcia-Fernàndez 2005). These clusters arose in a common  
225 ancestor and were preserved because of a common regulatory mechanism such as cis-  
226 regulatory elements located within the cluster. The homeobox-containing *Hox* gene family,  
227 typically composed of 13 members in vertebrates (Hoegg and Meyer 2005), is among the best-  
228 studied examples of such an ancient gene cluster and is critical for the correct embryonic  
229 development (Pearson et al. 2005). The linear genomic arrangement of genes within the *Hox*  
230 cluster reflects their spatial expression along the anterior-posterior body axis (Pascual-Anaya  
231 et al. 2013), which establishes regional identity across this axis. The basal cephalochordate *B.*  
232 *floridae* has all 13 *hox* genes located in a single stereotypical cluster, along with an additional  
233 14<sup>th</sup> gene (Fig. 3B; (Takatori et al. 2008)), suggesting that the chordate ancestor also had an  
234 intact cluster. However in tunicates, this clustering appears to be lost. In *C. robusta*, the nine  
235 identified *Hox* genes are distributed across five scaffolds, with linkages preserved only  
236 between *Hox2*, *Hox3* and *Hox4*; *Hox5* and *Hox6*; *Hox12* and *Hox13* (Fig. 3; (Spagnuolo et al.  
237 2003; Wada et al. 2003)). In *O. dioica*, the total number of *Hox* genes is further reduced to  
238 eight, split between 6 scaffolds, including a duplication of *Hox9* (Fig. 3A; (Edwardsen et al.  
239 2005)). In *M. oculata* we could identify only six *Hox* genes, divided between 4 scaffolds, with  
240 clustering retained for the *Hox10*, *Hox11* and *Hox12* genes (Fig. 3). In Botryllidae genomes, the  
241 same seven *Hox* genes are conserved (Fig 3B), with a preserved linkage between *Hox10*,  
242 *Hox12* and *Hox13* in *B. leachii* and three copies of *Hox5* present in *B. schlosseri*. Altogether, the  
243 separation of the tunicate *Hox* cluster genes supports the hypothesis that reduction and  
244 separation of this ancient gene linkage occurred at the base of tunicate lineage (Edwardsen et  
245 al. 2005). In addition, *Hox9* appears to be specifically retained in neotenic Tunicates while  
246 there is no pattern of conserved *Hox* cluster genes specific to colonial ascidians.

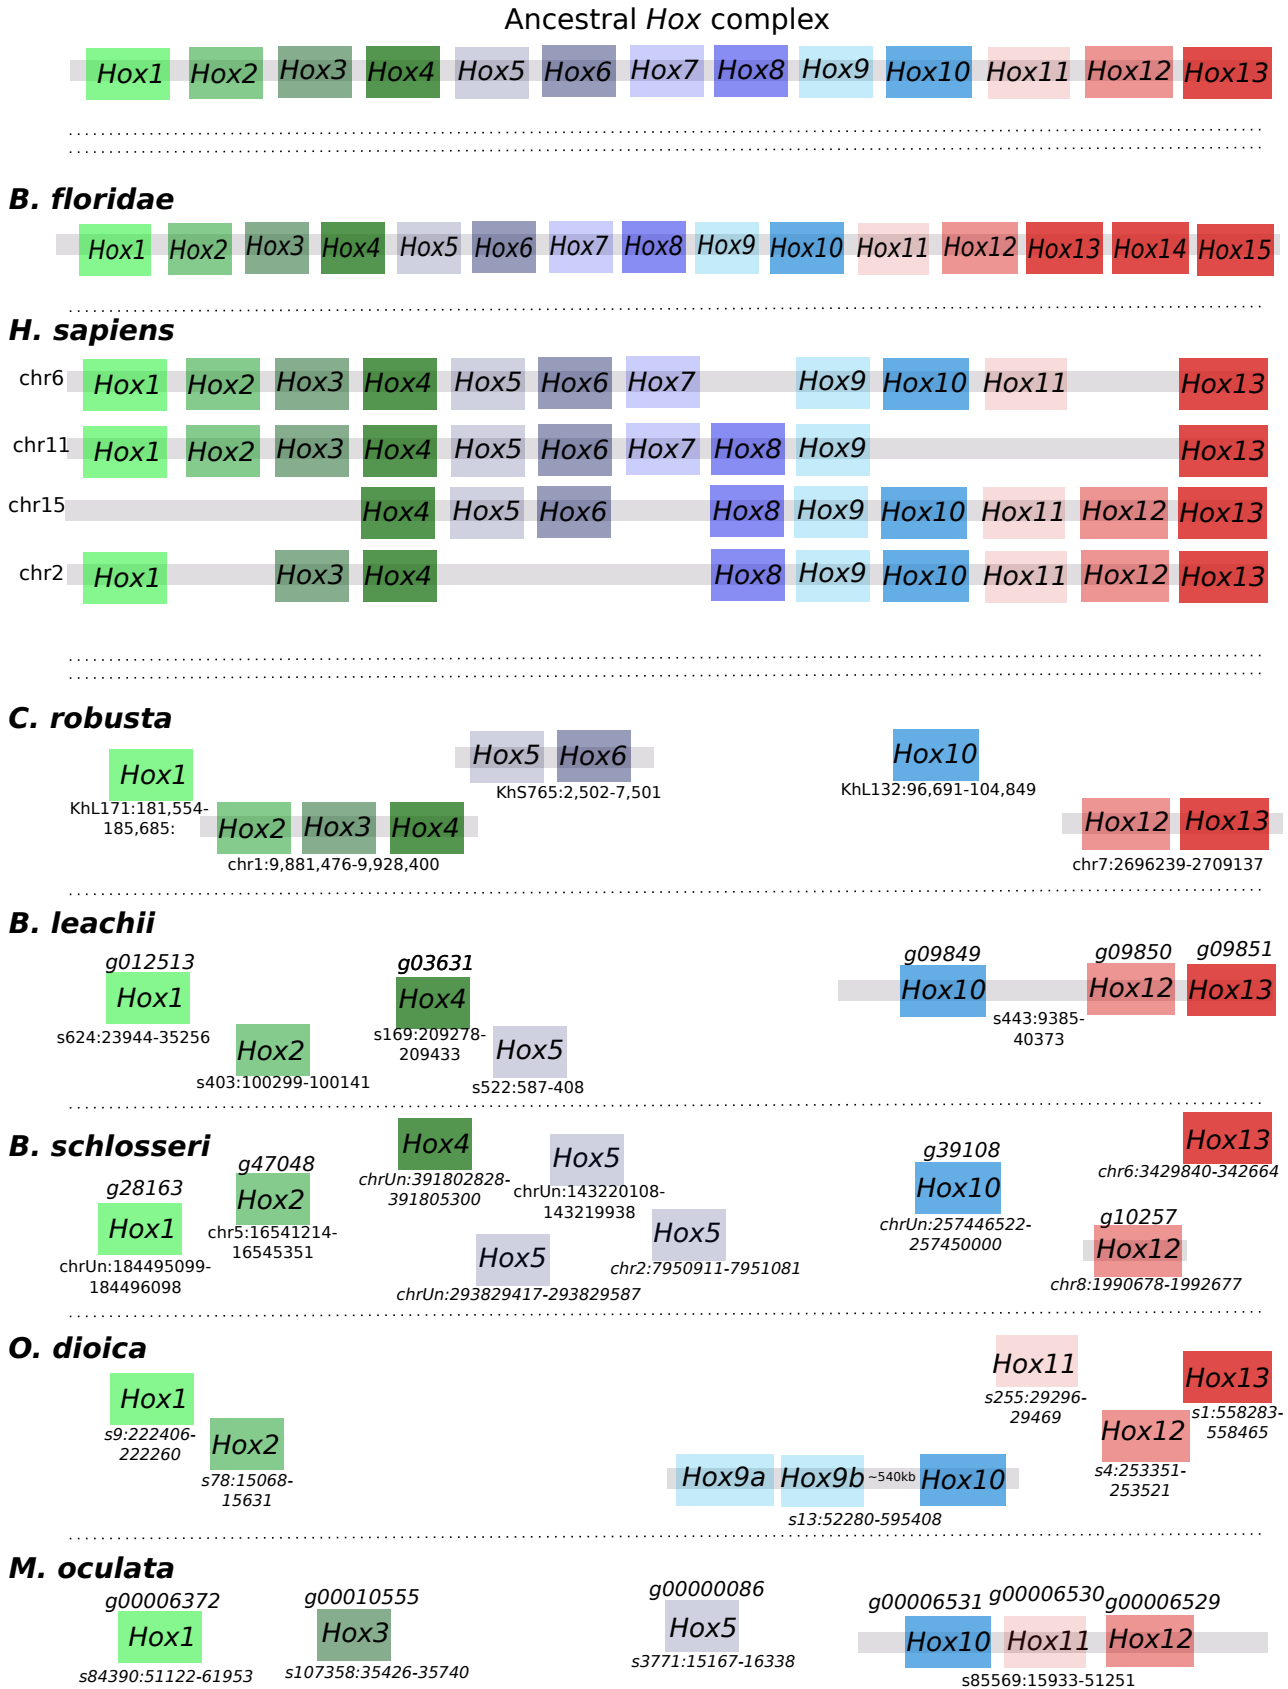

**Figure 3. Hox genes are dispersed and reduced in number within tunicate genomes.** Schematic depicting Hox gene linkages retained in five tunicate genomes in comparison to the ancestral Hox complex, which included thirteen genes. Orthologous genes are indicated by common colours. Chromosome or scaffold number is shown, along with gene ID when available for newly annotated genomes.



248 A second ancient homeobox-containing gene linkage is the *NK* cluster. This cluster, predicted  
249 to be present in the last common ancestor of bilaterians (Luke et al. 2003), consists of *Msx*,  
250 *Lbx*, *Tlx*, *NKx1*, *NKx3*, *NKx4* and *NKx5* (Fig. 4). In *B. floridae*, linkages between *Msx*, *NKx4* and  
251 *NKx3*; as well as between *Lbx* and *Tlx* provide evidence of retained ancestral clustering while  
252 *NKx5* was lost (Fig. 4; (Luke et al. 2003)). However in vertebrates, *NKx5* is still present, while  
253 only the gene linkages between *Lbx* and *Tlx* as well as between *Nkx4* and *Nkx3* remain (Fig. 4;  
254 (Garcia-Fernàndez 2005)). To further clarify the evolution of this ancestral cluster in  
255 tunicates, we determined the structure of the *NK* cluster within five ascidian genomes. In all  
256 these species, *NKx1* is absent and no evidence of clustering could be found with all identified  
257 orthologs located on different scaffolds (Fig. 4). In *C. robusta*, *M. oculata* and *O. dioica* only five  
258 members of this cluster remain, with the loss of either *Lbx* or *Tlx* as well as of *NKx3* and the  
259 duplication of the ortholog of *NKx4* (Fig. 4). By contrast, in the colonial tunicates *B. leachii* and  
260 *B. schlosseri*, *Tbx*, *Lbx* and *NKx3* are all present. In *B. schlosseri*, *Msx1* is absent and *NKx4*  
261 duplicated. In the *B. leachii* genome, *NK1* is the only ancestral cluster member to be missing  
262 and *Nk5* has been duplicated (Fig. 4). Altogether, these results suggest that there has been a  
263 loss of *NKx5* in Cephalochordate, one of *NKx1* in Tunicate and that the combination of *NKx3*,  
264 *Lbx* and *Tbx* may be specific to colonial ascidians.



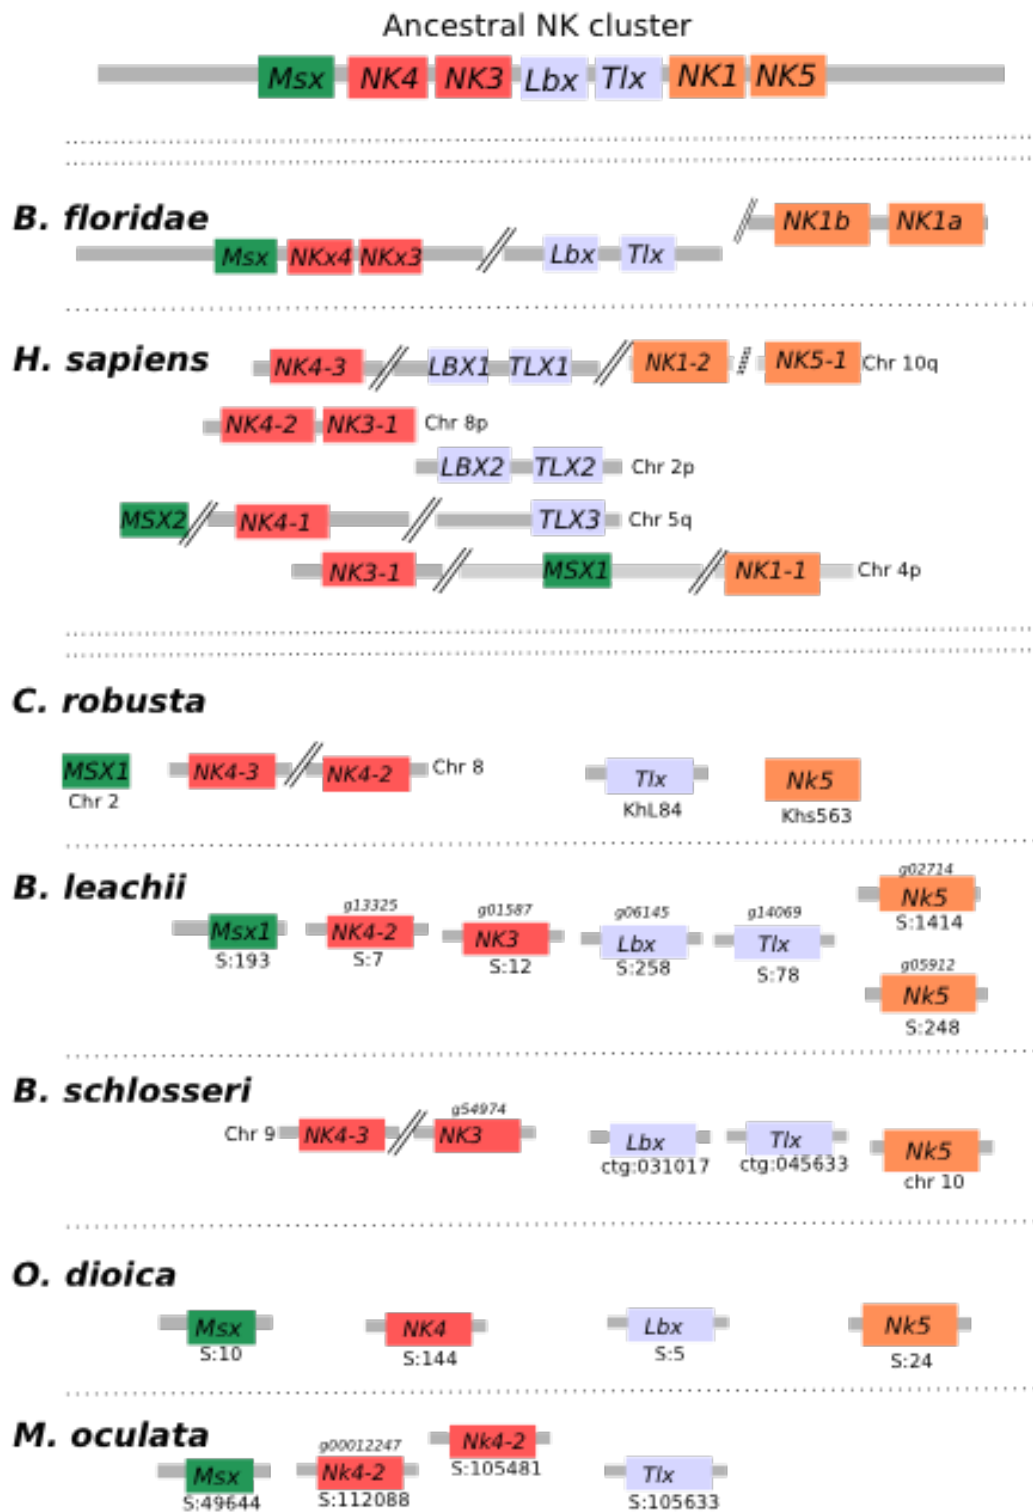

**Figure 4. NK homeobox cluster genes are fragmented within tunicate genomes.**

Schematic depicting the organization of the *NK homeobox* cluster genes among the studied chordate genomes. Double-parallel lines indicate > 1Mb distance between genes. Chromosome or scaffold number is shown, along with gene ID when available for newly annotated genomes. Orthologous genes are indicated by common colours.

266 A third ancient linkage that we investigated is the pharyngeal cluster, a gene group present in  
267 hemichordates, echinoderm and vertebrates genomes that is considered to be Deuterosome  
268 specific (Simakov et al. 2015). The cluster groups *foxhead domain protein (FoxA)*, *NKx2*  
269 (*NKx2.2 and Nkx2.1*), *Pax1/9*, *mitochondrial solute carrier family 25 member 21 (slc25A21)*,  
270 *mirror-image polydactyly 1 protein (mipol1)*, *egl nine homolog 3 (egln3)* and  
271 *dehydrogenase/reductase member 7 (dhhrs7)*. Among these, *slc25a21*, *Pax1/9*, *mipol1* and *FoxA*  
272 pairs are also found in protostomes suggesting an even more ancient origin (Simakov et al.  
273 2015). The pharyngeal cluster is thought to have arisen due to the location of the regulatory  
274 elements of *Pax1/9* and *FoxA* within the introns of *slc25A21* and *mipol1* (Santagati et al. 2003;  
275 Wang et al. 2007), constraining the genes to remain in tight association with each other. In the  
276 *B. floridae* genome, the entire cluster is located on the same scaffold, with the exception of the  
277 *Nkx2.1* and *Nk2.2* gene pair located on separate scaffold. In *C. robusta*, only orthologs of *FoxA*,  
278 *slc25a29*, *Pax1* and *Pax9* could be identified. Nevertheless, all of them are located on the same  
279 chromosome (Fig. 5). In *O. dioica*, the cluster appears even further reduced. While orthologs of  
280 *FoxA*, *Pax1/9* and *Nkx2.2* genes were found on different scaffolds, only one rather distant  
281 linkage (> 1 Mb) between a *Pax-like* gene and *slc25A21* is retained. For both *B. schlosseri* and  
282 *M. oculata*, there was no evidence of clustering between genes (Fig. 5). In the *B. leachii*  
283 genome, *mipol1* is the sole missing gene from this cluster. However, only the pairing of a *Pax-*  
284 *like* and *slc25A21* genes remains (Fig. 5). Altogether, these results suggest that most of the  
285 Tunicates did not conserve the structure of this ancient linkage, but it is unknown what  
286 consequences this would have to their expression and function.

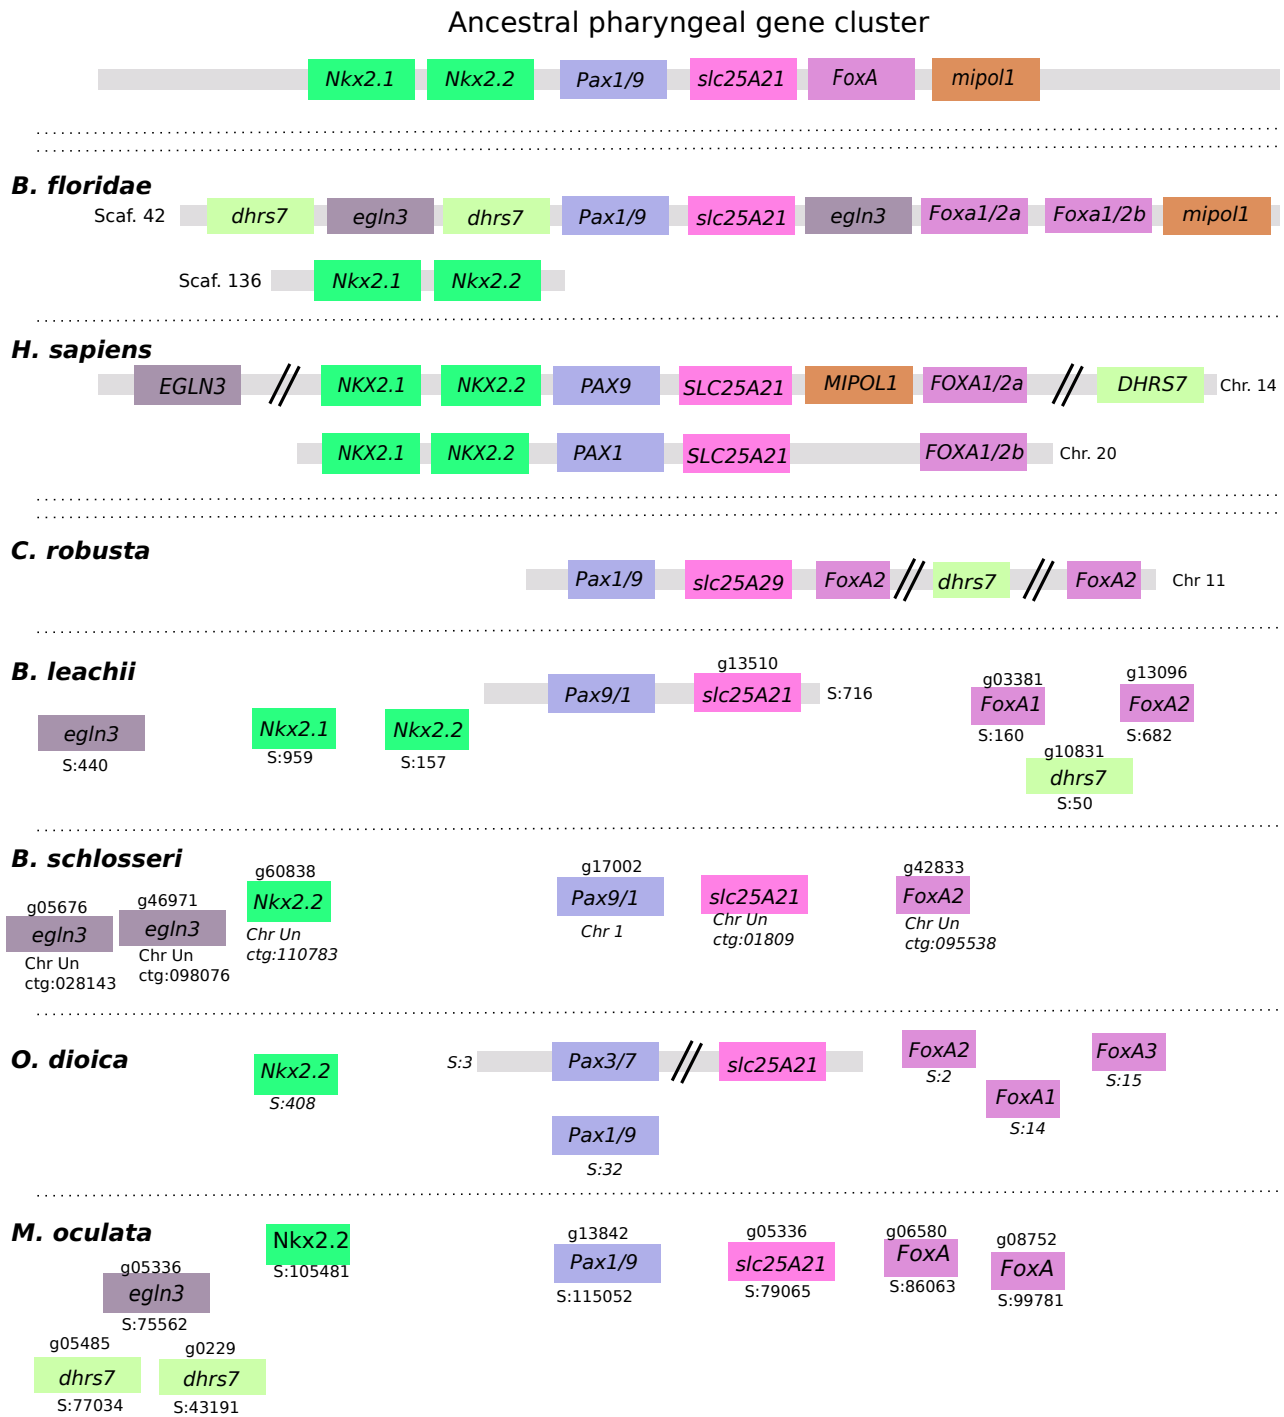

**Figure 5. Ancestral gene linkages remain between a few pharyngeal cluster genes in tunicate genomes.** Gene order of the six pharyngeal cluster genes, *NK2.1*, *NK2.2*, *Pax1/9* and *FoxA* in chordate genomes. Double-parallel lines indicate > 1 Mb distance between genes. Chromosome or scaffold number is shown, along with gene ID when available for newly annotated genomes. Orthologous genes are indicated by common colours.

289 ***Lineage-specific changes to cell-signalling pathways in Botryllidae genomes.***

290 To dissect more specifically the evolution of colonial ascidians, we examined the  
291 genomes of *B. leachii* and *B. schlosseri*, looking for key components of signalling pathways  
292 required for metazoan development and regeneration. Of particular interest, we focused on  
293 the Wingless-related integration site (Wnt), Notch and Retinoic acid (RA) signalling pathways.  
294 All three of these pathways have been implicated in WBR and asexual reproduction in colonial  
295 tunicates (Rinkevich et al. 2008, 2007b; Zondag et al. 2016).

296

297 **Wnt pathway**

298 Wnt ligands are secreted glycoproteins that have roles in axis patterning,  
299 morphogenesis and cell specification (Loh et al. 2016). The ancestral gene family appears to  
300 originate very early on during multi-cellular evolution and to be composed of eleven members  
301 (Kusserow et al. 2005; Guder et al. 2006). The *Wnt* gene family expanded to 19 members in  
302 the human genome, while independent gene loss has reduced this family to 7 genes in  
303 *Drosophila melanogaster* and *Caenorhabditis elegans* (Prud'homme et al. 2002). Consequently,  
304 we set out to investigate whether the *Wnt* gene family has either expanded or contracted  
305 during Tunicata speciation.

306 We found an increase in the number of *Wnt5a* genes among Styelidae genomes. In *B.*  
307 *schlosseri*, we identified 15 *Wnt* members, including seven *Wnt5a-like* genes on multiple  
308 scaffolds (Fig. 6, Table S2). In the *B. leachii* genome, fourteen *Wnt* ligand genes were  
309 identified, including four *Wnt5a* genes located on the same scaffold near *Wnt4* (Fig. 6). *M.*  
310 *oculata* has only 7 *Wnt* ligand genes, including three *Wnt5a-like* genes (Fig. 6, Table S2). In  
311 comparison, *C. robusta* has a total of 11 *Wnt* genes, including a single *Wnt5a* gene (Fig. 6,  
312 Table S2; (Wada et al. 2003)). In the compact *O. dioica* genome, this number has reduced to 6  
313 (*Wnts* 3, 4, 7, 11 and 16), none of which are *Wnt5a* orthologs (Table S2). Overall, this suggests

314 that an expansion through gene duplication of the *Wnt5* family occurred during tunicate  
 315 evolution, but was lost in some lineages.

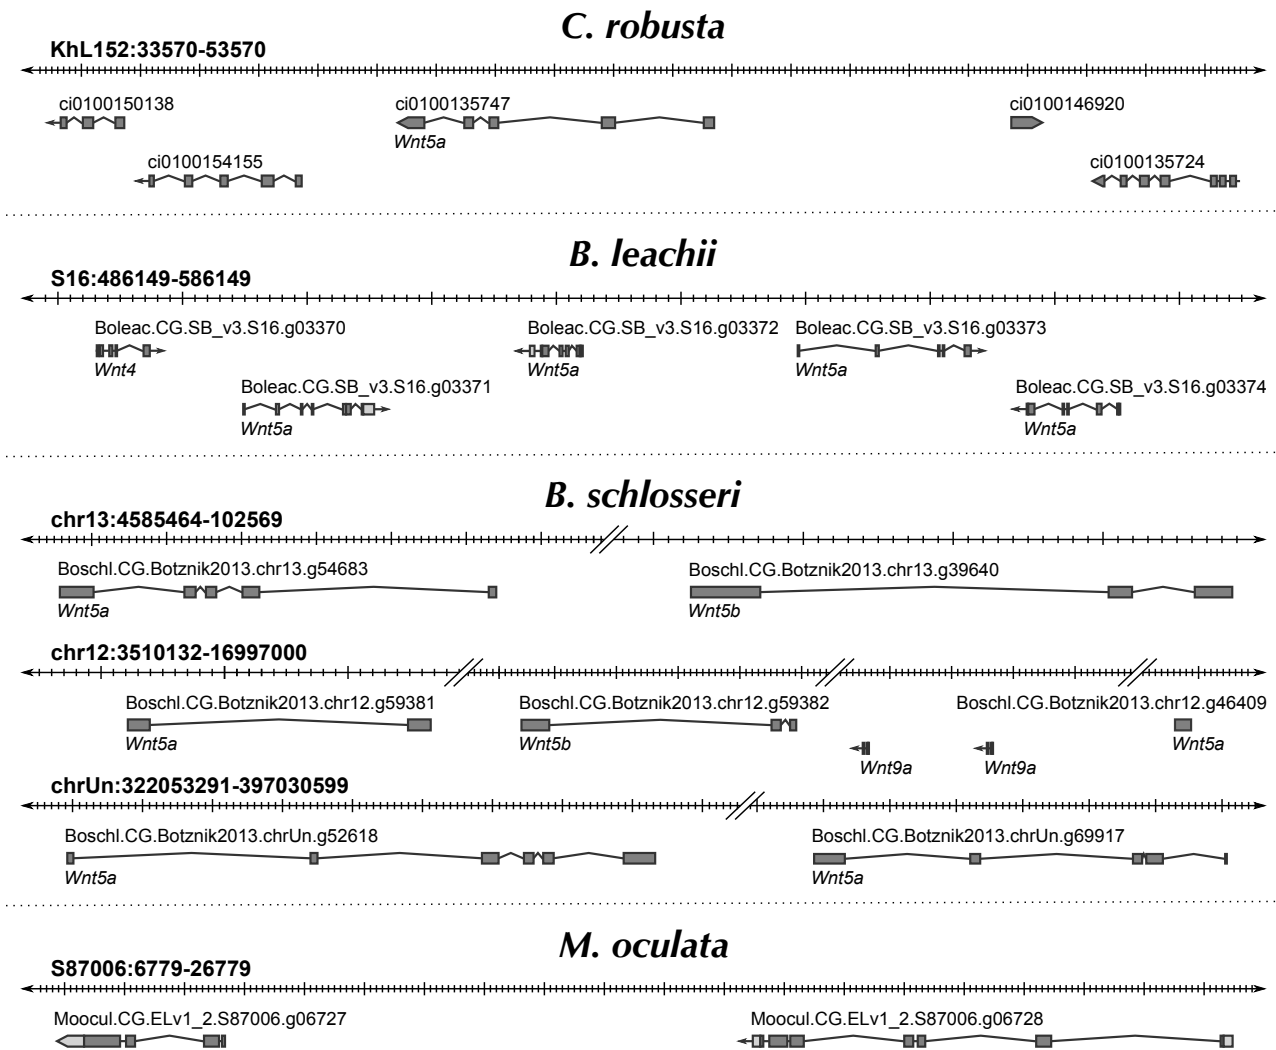

**Figure 6. Duplication of *Wnt5a* genes in tunicate genomes.**

Schematic showing the genomic location of *Wnt5*-like genes within each indicated genome. Note that no *Wnt5a* ortholog is present in the *O. dioica* genome. Double-parallel lines indicate > 1Mb distance between genes.

316

317 To assess the functionality of the Wnt pathway in Tunicates, we set out to assess  
 318 whether its downstream effectors are themselves present in the available genomic data. The  
 319 downstream pathways activated by Wnt ligands are divided into canonical, non-canonical  
 320 calcium and non-canonical planar cell polarity. The *Wnt5a* ligand is associated with both of

321 the non-canonical pathways through binding of membrane receptors that include *frizzled*  
322 (*Fzd4*), *receptor tyrosine kinase-like orphan receptor 1/2 (Ror1/2)* and *atypical tyrosine kinase*  
323 *receptor (Ryk)*. Further downstream, *disheveled (dsh)*,  $\beta$ -catenin (*Cnntb*), *Axin*, low-density  
324 lipoprotein receptor-related protein 5/6 (*LRP5/6*) and nuclear factor of activated T-cells  
325 (NFAT) are proteins essential for triggering intracellular responses to Wnt signalling  
326 (MacDonald et al. 2009). We identified orthologs for each of these signalling transduction  
327 molecules in all Tunicata genomes (Table S2), with no evidence of further gene duplication  
328 events. This supports the interpretation that signalling through the Wnt pathway is functional  
329 in tunicates.

330

### 331 **Notch pathway**

332 Notch receptors are transmembrane proteins that are involved in cell-cell signalling  
333 during development, morphogenesis and regeneration (Hamada et al. 2015). Following  
334 activation through the binding of the delta or jagged/serrate ligands, the intracellular domain  
335 of Notch is cleaved and induces the expression of downstream target genes including the *hes*  
336 (*hairy and enhancer of split*) gene family members (Guruharsha et al. 2012). The presence of  
337 both Notch and the Delta/Serrate/lag-2 (DSL) proteins in most metazoan genomes suggests  
338 that their last common ancestor had a single copy of each gene (Gazave et al. 2009). To  
339 establish how this pathway has evolved in tunicates, we screened these genomes for the  
340 Notch receptor using the conserved lin-Notch repeat (LNR) domain, and for genes encoding  
341 probable Notch ligands such as genes from the DSL family .

342 In all examined genomes, only a single *Notch* receptor gene was identified while the  
343 number of ligand genes varied (Table S3). The *C. robusta* genome contains two *DSL* genes,  
344 while *O. dioica*, *M. oculata* and *B. schlosseri* possess only a single *DSL*. By contrast, we found  
345 three *DSL* genes in *B. leachii* (Table S3). To determine the relationships between these

346 identified tunicate DSL-like genes, a phylogeny was constructed along with other chordate  
347 DSL proteins. All three *B. leachii* genes are Delta orthologs, two of them related to the *B.*  
348 *schlosseri* and *Cionidae* copy; the third one closer to the *M. oculata* and *H. roretzi* variant. The  
349 mouse, human and zebrafish delta and delta-like (DLL) proteins form a discrete clade loosely  
350 related to the genes found in Cephalochordates and Tunicates (Fig. 7, shaded box). Jagged  
351 proteins form a separate clade (Fig. 7). The tunicate DSL-like proteins present long  
352 phylogenetic branches, suggestive of greater diversity, which is also observed in the protein  
353 alignment (Fig. S3). This suggests that the tunicate DSL proteins are diverging rapidly from  
354 each other, indicative of lineage specific evolution of DSL-like genes.

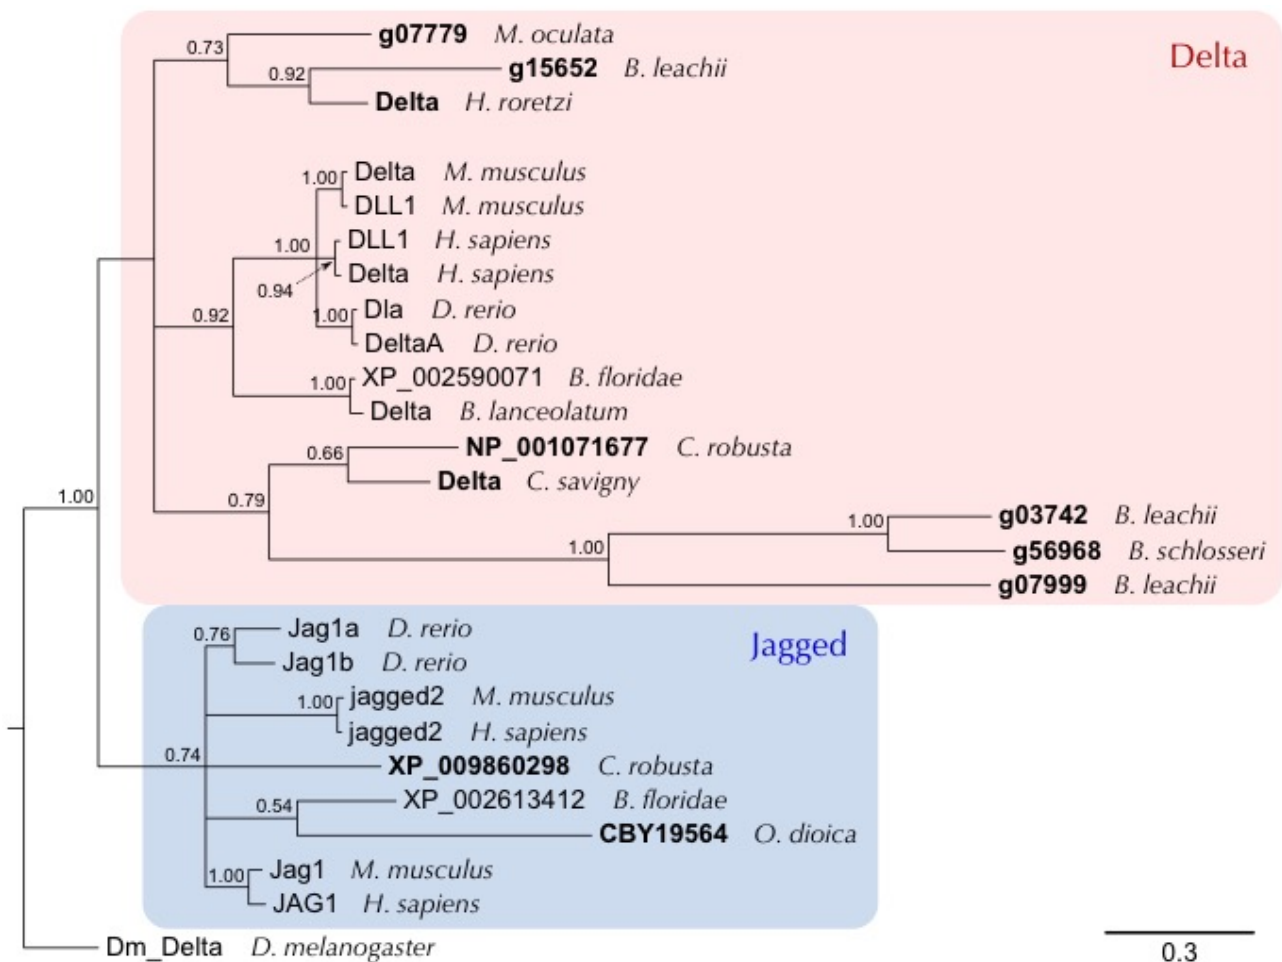

355

### Figure 7. *B. leachii* Notch pathway

Bayesian phylogenetic tree depicting the relationship between tunicate and vertebrate DSL proteins, using *Drosophila* Delta to root the tree. Tunicate proteins are shown in bold and shaded areas correspond to Delta and Jagged groupings. Branch support values (probabilities) are indicated.



356

357

## 358 **Retinoic acid signalling**

359 Retinoic acid (RA) is an extracellular metabolite that is essential for chordate  
360 embryonic development. RA is synthesized from retinol (vitamin A) by two successive  
361 oxidation steps. In the first step, retinol dehydrogenase (RDH) transforms retinol into retinal.  
362 Then RA is produced by aldehyde dehydrogenase (ALDH), a superfamily of enzymes with  
363 essential roles in detoxification and metabolism (Jackson et al. 2011). RA influences the  
364 expression of downstream target genes by binding to the RA receptors, RAR and RXR (Fig. 8A  
365 (Cunningham and Duester 2015)). Finally, RA is metabolized by the cytochrome P450 family  
366 26 (Cyp26) enzyme, which absence of expression can restrict RA-induced responses to  
367 specific tissues or cell types (Ross and Zolfaghari 2011). Components of this pathway have  
368 been found in non-chordate animals, suggesting a more ancient origin (Canestro et al. 2006).  
369 This pathway has previously been shown to be required for *B. leachii* WBR and *Ciona*  
370 development, yet several genes required for RA signalling appear to be missing in *O. dioica*  
371 (Martí-Solans et al. 2016).

372 Rdh10 is the major dehydrogenase associated with the first steps of RA production,  
373 although the Rdh16 and RdhE2 enzymes can also substitute this function (Belyaeva et al.  
374 2009; Lee et al. 2009; Belyaeva et al. 2015). The *O. dioica* genome has no orthologs for either  
375 *Rdh10* or *Rdh16* but it does have four genes that encode for RdhE2 proteins (Martí-Solans et  
376 al. 2016). *O. dioica* also lacks both an *Aldh1*-type gene as well as a *Cyp26* gene but has a single  
377 RXR-ortholog (Table S4, (Martí-Solans et al. 2016)). In contrast, the *C. robusta* genome,  
378 contains single copies of *Rdh10*, *Rdh16* and *RdhE2* genes and a total of four *Aldh1* genes,  
379 located on two chromosomes (Canestro et al. 2006). Consistent with *C. robusta*, *M. oculata*, *B.*



380 *leachii* and *B. schlosseri* genomes all have single copies of *Rdh10*, *Rdh16* and *RdhE2* genes, as  
381 well as three *Aldh1a/b* genes on separate scaffolds (Table S4).

382 Three retinoic acid receptor genes were identified within the *B. leachii* genome, one of  
383 which had been cloned previously (*g03013*, (Rinkevich et al. 2007b) All three were also found  
384 in *C. robusta*, *M. oculata* and *B. schlosseri* genomes (Table S4). While there is only one potential  
385 *Cyp26* gene in *M. oculata*, four paralogs were identified in *B. leachii* and *B. schlosseri*. A  
386 phylogenetic analysis showed that these 4 genes group with CYP26 proteins (Fig. 8B, Table  
387 S4). Altogether, these results show a loss of key RA-pathway genes in *O. dioica* (*Rdh10*, *Rdh16*,  
388 *Cyp26* and *Aldh1a*), while copy numbers in other tunicate genomes increase.

389

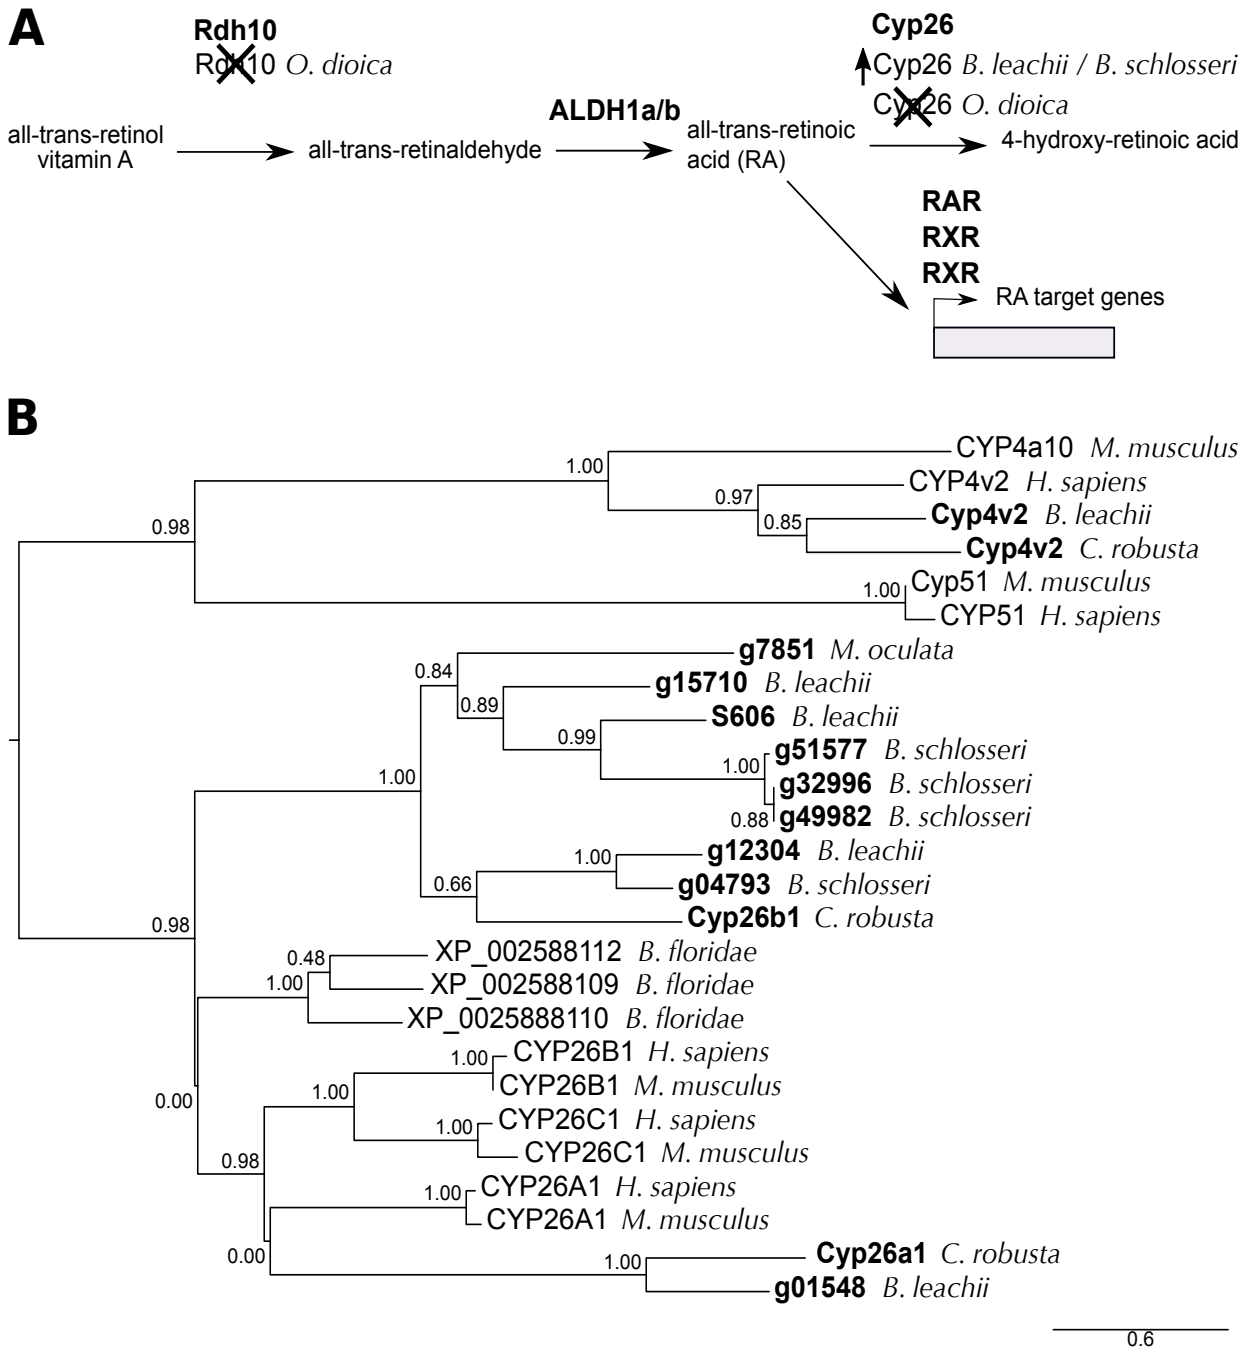

**Figure 8. Evolution of the RA pathway in tunicates**

**(A)** Overview of the RA synthesis and degradation pathway. In bold are the major proteins that contribute to RA signalling during animal development. Indicated below these are changes to the number of copies present in examined genomes. **(B)** ML phylogenetic tree depicting the relationship between invertebrate and vertebrate CYP26 proteins using CYP4 and CYP51 proteins as an out-group. Tunicate proteins are shown in bold. No *Cyp26* gene has been identified in the *O. dioica* genome. Values for the approximate likelihood-ratio test (aLRT) are indicated.

## 391 **Discussion**

392

### 393 **Genomic diversity within the Stolidobranchia**

394 The *B. leachii* genome, along with previous genomic analyses of other ascidian species,  
395 support the widely held view that ascidian genomes are diverse and rapidly evolving, which is  
396 particularly evident in the Stolidobranchia group (Seo et al. 2001; Dehal et al. 2002b;  
397 Voskoboynik et al. 2013a; Stolfi et al. 2014; Tsagkogeorga et al. 2010; Bock et al. 2012;  
398 Tsagkogeorga et al. 2012; Rubinstein et al. 2013; Griggio et al. 2014). Nevertheless, botryllids  
399 are sufficiently similar in external appearance and morphology for early researchers to have  
400 suggested that *Botrylloides* could be a subgenus of *Botryllus* (Saito et al. 2001; Nydam et al.  
401 2017). Strikingly however, the *B. schlosseri* genome differs from that of *B. leachii*, as well as  
402 from other sequenced tunicate genomes (Table 2). Particularly striking is the comparison  
403 between the *B. leachii* and *B. schlosseri*, where differences in genome sizes (194 Mb vs 725  
404 Mb), the fraction of repetitive sequences (18 % vs 60 %; 65 % in (Voskoboynik et al. 2013a))  
405 and the predicted gene number (15,839 vs 27,463; (Voskoboynik et al. 2013a)) suggest  
406 divergent genome architectures. Altogether, these comparisons indicate that the *B. schlosseri*  
407 genome has undergone a significant increase in its genomic content, including  
408 retrotransposon expansion (Table S1). In particular, there are at least two additional families  
409 in the *B. schlosseri* hAT transposon superfamily and counts of common hAT elements, such as  
410 hAT-Charlie, can differ dramatically (e.g. hAT-Charlie 366 in *B. leachii* vs 46,661 in *B.*  
411 *schlosseri*). DNA methylation is a key suppressor of transposon activity, changes to the  
412 methylation of transposable elements is a known driver of increased transposition (O'Neill et  
413 al. 1998; Maumus and Quesneville 2014; Simmen et al. 1999; Suzuki et al. 2007). DNA  
414 methylation in tunicate species has only been studied in *C. robusta*, and is described as mosaic,  
415 gene body methylation, whereas non-coding regions including transposons remain

416 unmethylated (Suzuki et al. 2007), it is unknown how retrotransposons are suppressed in  
417 tunicate genomes. Nevertheless, the observed increase in transpositions could be a  
418 consequence of low non-coding DNA methylation, which may contribute to the rapid genome  
419 evolution observed in tunicate species, even between closely related species such as *B.*  
420 *schlosseri* and *B. leachii*.

421 Rapid genome evolution, and active transposable elements in particular, are proposed  
422 to aid adaptation to new environments for invasive species (Stapley et al. 2015). Differences  
423 in the colonization ability of tunicates has been noted, not only between related species such  
424 as *B. leachii* and *B. schlosseri* (Brunetti 1976; Brunetti et al. 1980; Brunetti 1974), but even at  
425 the molecular level within *B. schlosseri* populations (Bock et al. 2012; Nydam et al. 2017). It is  
426 thus possible that the observed success in tunicate invasion (Zhan et al. 2015) is supported by  
427 their plasticity in genome characteristics like transposon diversity and gene number.

428 Ancient homeobox gene clusters whose structure has been retained over millions of  
429 years of evolution in many organisms are fragmented in tunicate genomes. Because, the  
430 expression of each *Hox* gene across the anterior-posterior axis relates to their location within  
431 the *Hox* gene cluster (Pascual-Anaya et al. 2013), cluster breaks are predicted to have  
432 consequences for patterning processes. However, an adult body plan with correct spatial  
433 orientation of its body axes during tissue development in ascidians also needs to be  
434 established during sexual, asexual and WBR. Early patterning events in tunicate species have  
435 only been characterized during sexual reproduction in *Ciona*. Early stages of development  
436 (prior to gastrulation) follow a mosaic pattern of developmental axis formation, where  
437 inheritance of maternally provided factors establishes the body axes (Nishida 2005). *Hox* gene  
438 knockdown experiments in *C. robusta* revealed that they have very limited roles, with defects  
439 only observed in larval neuronal and tail development upon loss of *Ci-Hox11* and *Ci-Hox12*  
440 function (Ikuta et al. 2010). It thus appears that patterning events in *C. robusta* are less

441 dependent upon anterior-posterior spatial expression of *Hox* genes to establish regional  
442 identity. Previously in *B. schlosseri*, the entry point of the connective test vessel into the  
443 developing bud determines the posterior end of the new zooid (Sabbadin et al. 1975).  
444 Therefore it is possible that ascidians incorporate environmental and physical cues to  
445 compensate for the lost gene cluster during polarity establishment. A wider analysis  
446 comprising multiple tunicate species will be necessary to investigate the exact consequences  
447 of homeobox cluster dispersion and whether the compensatory mechanism observed in *C.*  
448 *robusta* is the norm or an exception.

449

### 450 **Gene orthology analysis and coloniality candidate pathways**

451 Among the tunicate orthologous clusters that we obtained, we identified several  
452 groups of genes that are not shared by all the tunicate genomes (Fig. 2A). Given the rapid  
453 genomic evolution of these organisms, it is more likely that these genes have either been lost  
454 or that their sequence has highly diverged, rather than independent gains of novel genes.

455 Of particular interest are the genes found only in the *B. schlosseri* and *B. leachii*  
456 genomes, as these may function in biological processes unique to colonial tunicates. Many of  
457 these genes have orthologs not only in vertebrates, but also in more evolutionarily distant  
458 animals such as *C. elegans* (File S4). This suggests that these genes have a more ancient origin,  
459 which was retained specifically in Botryllidae genomes. The overrepresented genes (File S4)  
460 have annotated functions including circulation (GO:0003018, GO:0003013, GO:0050880),  
461 wound healing (GO:0072378) and cell communication (GO:0007154); as well as regulation of  
462 immune cell differentiation (GO:0033081, GO:0033089), immune system process  
463 (GO:0002376) and interferons (GO:0032608). Unlike solitary tunicate species, colonial  
464 ascidians possess a complex system of single cell-lined vessels used to transport haemocytes  
465 and facilitate communication between zooids within the colony (Mukai et al. 1978). In

466 addition, immune response is known to have roles in wound healing, vasculogenesis,  
467 allorecognition and regeneration (Voskoboynik et al. 2013b; Taketa et al. 2015; Gutierrez and  
468 Brown 2017; Sattler 2017). Therefore, it is possible that these genes, found only in *Botryllus*  
469 and *Botrylloides*, contribute to biological pathways and cellular processes that have important  
470 roles in colonialism.

471 Both *O. dioica* and *B. schlosseri* had a high number (2160 and 2716 respectively) of  
472 clusters unique to their genomes (Fig. 2A). While the *O. dioica* genome has undergone  
473 considerable loss of ancestral genes (Albalat and Cañestro 2016; Seo et al. 2001), the total  
474 number of genes in this specie is similar to that of other tunicates (Table 2). Taken together,  
475 these observations suggest that there has been a duplication of the retained genes such as *Otx*  
476 (3 copies in *O. dioica*, one in *Ciona*(Cañestro et al. 2005)), potentially involving roles in their  
477 peculiar neotenic and dioecious life cycle. The *B. schlosseri* genome has an ~10,000 higher  
478 predicted gene number compared to other tunicates (Table 2). Such massive increase in  
479 numbers suggests partial genome duplication. Further analysis will be required to determine  
480 whether these are novel or duplicated genes, hence providing important insights in the  
481 evolution of Tunicata genomes.

482

### 483 **Lineage-specific changes to evolutionarily conserved cell communication pathways**

484 Cell signalling pathways are critical for morphogenesis, development and adult  
485 physiology. In particular, we have focused our analysis on three highly conserved pathways:  
486 Wnt, Notch and Retinoic Acid signalling. Representatives of all twelve *Wnt* gene subfamilies  
487 are found in metazoans, suggesting that they evolved before evolution of the bilaterians  
488 (Janssen et al. 2010). We identified members of each *Wnt* subfamily in tunicate genomes,  
489 along with numerous examples of lineage-specific gene loss and/or duplication. The most  
490 striking of these events was an increase in *Wnt5a* gene copy number in *B. leachii*, *B. schlosseri*

491 and *M. oculata* genomes. Indeed, most invertebrates genomes, including the basal chordate *B.*  
492 *floridae*, contain a single *Wnt5* gene while most vertebrate genomes have two *Wnt5a* paralogs,  
493 believed to be a result of whole genome duplication (Martin et al. 2012). However, in the  
494 analysed tunicate genomes, up to 15 copies of this gene were identified, potentially these  
495 additional genes may have been co-opted into novel roles and were retained during tunicate  
496 evolution. *Wnt5a* ligands have numerous biological roles, including a suppressive one during  
497 zebrafish regeneration (Stoick-Cooper et al. 2007) and a promotive one during amphioxus  
498 regeneration (Somorjai et al. 2012). Furthermore, components of both Wnt signalling  
499 pathways are differentially expressed during WBR (Zondag et al. 2016). It is thus conceivable  
500 that *Wnt5a* gene number has expanded in colonial tunicates to sustain WBR. A functional  
501 characterization of the role of these numerous copies of *Wnt5a* would thus be highly  
502 interesting and potentially reveal evolutionary insights into chordate regeneration.

503 All components of the Notch pathway are present in the genomes we investigated. Of  
504 particular interest, the DSL Notch ligand appears to be rapidly evolving in the tunicates. This  
505 indicates that tunicate DSL proteins are under less pressure, than vertebrate orthologous  
506 proteins, to conserve their sequences. Given that the interaction between the DSL domain and  
507 the Notch receptor is core to signaling pathway activation (Chillakuri et al. 2012), it will be  
508 interesting to assess whether the functional ligand-receptor interactions between tunicate  
509 DSL proteins and tunicate Notch proteins have adapted accordingly.

510 Components of the RA signalling pathway have also been identified in all the tunicate  
511 genomes. However, *Oikopleura* has seemingly lost a functional RA synthesis pathway, while  
512 still forming a functional body plan. This suggests that either uniquely RA is not involved in  
513 critical developmental events in this species, that the RA signalling function has been replaced  
514 or that *O. dioica* utilizes an alternative synthesis approach. Conversely, lineage specific

515 increases in RA pathway gene numbers have been observed in *C. robusta* (Aldh1, (Sobreira et  
516 al. 2011)) and *Botrylloides* (CYP26 genes, Fig. 8).

517 RA, Notch and Wnt pathways play roles in regeneration and development in many  
518 species, including Stolidobranchian tunicates (Rinkevich et al. 2007b, 2008; Zondag et al.  
519 2016) and *Cionidae* (Hamada et al. 2015; Jeffery 2015). The observed loss of RA signalling  
520 genes may result in reduced regeneration ability for *O. dioica*, however it's regenerative  
521 abilities have not been characterized. Given the unique chordate WBR potential developed by  
522 colonial tunicates, it is conceivable that there is selective pressure on their genomes to retain  
523 these pathways. We thus predict that these pathways play a similar role in colony reactivation  
524 following hibernation.

525 Among tunicates there exist significant differences in life cycle, reproduction and  
526 regeneration ability, even between closely related species of the same family, which likely  
527 reflect an underlying diversity in genomic content. For instance, differences in both asexual  
528 and sexual reproduction have been observed within the Botryllidae family (Oka and  
529 Watanabe 1957; Brunetti 1974, 1976, Berrill 1951, 1947, 1941). Furthermore, *B. schlosseri*  
530 can only undergo WBR during a short time frame of their asexual reproductive cycle when the  
531 adults are reabsorbed by the colony (Voskoboynik et al. 2007; Kürn et al. 2011) while *B.*  
532 *leachii* can undergo WBR throughout their adult life (Rinkevich et al. 2007b). Overall, this  
533 indicates that despite a generally similar appearance, the rapid evolution of the Tunicata  
534 subphylum has provided diversity and innovations within its species. It will be interesting to  
535 investigate how such genomic plasticity balances between adaptation to new challenges and  
536 constraint, preserving common morphological features, in future studies.

537 In conclusion, our assembly of the *B. leachii* genome provides an essential resource for  
538 the study of this colonial ascidian as well as a crucial point of comparison to gain further  
539 insights into the remarkable genetic diversity among tunicate species. In addition, the genome



540 of *B. leachii* will be most useful for dissecting WBR in chordates; particularly through  
541 comparison with *B. schlosseri* for understanding how the initiation of WBR can be blocked  
542 during specific periods of their life cycle. Furthermore, given the key phylogenetic position of  
543 Tunicates with respect to vertebrates, the analysis of their genomes will provide important  
544 insights in the emergence of chordate traits and the origin of vertebrates.

## 545 **Methods**

546

### 547 **Sampling, library preparation and sequencing**

548 *B. leachii* colonies were collected from Nelson harbour (latitude 41.26°S, longitude  
549 173.28°E) in New Zealand. To reduce the likelihood of contamination, embryos were  
550 dissected out of a colony and pooled before carrying out DNA extraction using E.Z.N.A SP Plant  
551 DNA Mini Kit. A total of 2 µg each was sent to New Zealand Genomics Limited (NZGL) for  
552 library preparation and sequencing. Short read sequencing of Illumina TruSeq libraries in a  
553 HiSeq2500 generated 19,090,212 paired-end reads of 100 bp (average fragment size: 450 bp,  
554 adaptor length: 120 bp). A second sequencing (Illumina Nextera MiSeq Mate Pair) not size-  
555 selected generated 31,780,788 paired-end sequences of 250 bp (fragment size: 1.5 - 15 kb,  
556 median size: ~3 kb, adaptor length: 38 bp).

557 PreQC report was generated using the String Graph Assembler software package  
558 (Simpson 2014) and quality metrics before assembly with both FastQC (Andrews 2010) as  
559 well as MultiQC (Ewels et al. 2016) (Fig. S1). These analyses revealed that 91 % of sequences  
560 had a mean Phred quality score  $\geq 30$ , 96 % of bases a mean Phred quality score  $\geq 30$ , and  
561 39 % of sequences an adapter sequence (either Illumina or Nextera). Adaptor trimming was  
562 performed with NxTrim (O'Connell et al. 2015) for the mate pair library, followed by  
563 Trimmomatic (Bolger et al. 2014) with the following options: MINLEN:40  
564 ILLUMINACLIP:2:30:12:1:true LEADING:3 TRAILING:3 MAXINFO:40:0.4 MINLEN:40 for both  
565 libraries. After trimming, 86,644,308 paired-end (85 %) and 12,112,004 (12 %) single-end  
566 sequences remained (100 % with a mean Phred quality score  $\geq 30$ , < 1 % with an adapter  
567 sequence).

568

### 569 **Genome assembly**

570 *De novo* assembly was performed in three consecutive iterations following a Meta-  
571 assembly approach (Table S5). First, both libraries were assembled together in parallel, using  
572 a k-mer size of 63 following the results from KmerGenie (Chikhi and Medvedev 2014)  
573 whenever available, by five assemblers: AbySS (Simpson et al. 2009), Velvet (Zerbino and  
574 Birney 2008), SOAPdenovo2 (Luo et al. 2012), ALLPATHS-LG (Gnerre et al. 2011), MaSuRCA  
575 (Zimin et al. 2013). The MaSuRCA assembler was run twice, once running the adapter filtering  
576 function (here termed “MaSuRCA-filtered”), the other without (termed simply “MaSuRCA”).  
577 Their respective quality was then estimated using three different metrics: the N50 length, the  
578 BUSCO core-genes completion (Simão et al. 2015) and the Glimmer number of predicted  
579 genes (Delcher et al. 1999). Second, these drafts were combined by following each ranking  
580 using Metassembler (Wences and Schatz 2015), hence producing three new assemblies  
581 (limiting the maximum insert size at 15 kb). Third, the *B. leachii* transcriptome (Zondag et al.  
582 2016) was aligned to each meta-assembly using STAR (Dobin et al. 2013), which were then  
583 combined thrice more using Metassembler following their alignment percentage and limiting  
584 the maximum insert size at 3 kb, 8 kb and 15 kb. Finally, the quality of the meta-meta-  
585 assemblies was estimated using the BUSCO score and the best one (Table S5) selected as the  
586 reference *de novo* assembly.

587

## 588 **Data access**

589 All data was retrieved from the indicated sources in January 2016. Note that *Ciona*  
590 *intestinalis* type A (Dehal et al. 2002b) has recently been recognized as a distinct species  
591 (*Ciona robusta*, (Brunetti et al. 2015)) and that this study has been undertaken before it was  
592 renamed.

593 *B. leachii*, *B. schlosseri*, *C. robusta*, *M. oculata*: Ascidian Network for *In Situ* Expression and  
594 Embryonic Data (ANISEED, <https://www.aniseed.cnrs.fr/aniseed/>, (Tassy et al. 2010)).

595 *O. dioica*: Oikopleura Genome Browser

596 (<http://www.genoscope.cns.fr/externe/GenomeBrowser/Oikopleura/>, (Seo et al. 2001)).

597 *B. floridae*, *H. sapiens*: Joint Genome Institute (JGI, <http://genome.jgi.doe.gov>, (Grigoriev et al.  
598 2012))

599

### 600 **Repeat region analysis**

601 *A de novo* repeat library was build for each tunicate genome using RepeatModeler  
602 (Smit and Hubley 2015). This utilizes the RECON tandem repeats finder from the RepeatScout  
603 packages to identify species-specific repeats in a genome assembly. RepeatMasker (Smit et al.  
604 2015) was then used to mask those repeats.

605

### 606 **Gene annotation**

607 *Ab initio* genome annotation was performed using MAKER2 (Holt and Yandell 2011)  
608 with Augustus (Stanke and Waack 2003) and SNAP (Korf 2004) for gene prediction. In  
609 addition, we used our previously published transcriptome (Zondag et al. 2016) and a  
610 concatenation of UniProtKB (UniProt Consortium 2015), *C. robusta* and *B. schlosseri* proteins  
611 into a custom proteome as evidence of gene product. Using the predicted genes, Augustus and  
612 SNAP were then trained to the specificity of *B. leachii* genome. A second round of predictions  
613 was then performed, followed by a second round of training. The final annotation of the  
614 genome was obtained after running a third round of predictions, and the provided trained  
615 Augustus and SNAP configurations after a third round of training. Non-coding RNA sequences  
616 were then annotated using Infernal (Nawrocki and Eddy 2013) with Rfam library 12.0  
617 (Nawrocki et al. 2015), tRNAscan-SE (Lowe and Eddy 1997) and snoRNA (Lowe 1999).  
618 Finally, the identified sequences were characterized by InterProScan (Jones et al. 2014).

619

## 620 **Analysis of Gene Ontology terms**

621           Distribution of Gene Ontology (GO) terms were computed for each species as follows.  
622 GO terms were extracted from the genome annotation and the number of occurrence for each  
623 term determined using a custom Python script. The resulting list of frequencies was then  
624 simplified using REVIGO (similarity factor “small” of 0.5, (Supek et al. 2011)) and the  
625 TreeMap output retrieved. The hierarchy of every GO term present was reconstructed  
626 following the schema defined by the core gene ontology (go.obo, (The Gene Ontology  
627 Consortium 2015)) using a custom Python script selecting the shortest path to the root of the  
628 tree, favouring smaller GO terms identification number in case of multiple paths. Finally,  
629 frequencies were displayed using the sunburstR function of the Data-Driven Documents  
630 library (D3, (Bostock et al. 2011)).

631           Predicted amino-acid sequences for all species were retrieved and clustered into  
632 17,710 groups by OrthoMCL (Li et al. 2003). Protein sequences within each group were then  
633 aligned into a Multiple Sequence Alignment (MSA) by Clustal-Omega, and the corresponding  
634 consensus sequence inferred by EMBOSS cons. Consensus sequences were matched to the  
635 Swiss-Prot curated database using BLASTp (e-value cut-off of  $10^{-5}$ ), and the GO terms  
636 corresponding to the best match retrieved. GO terms frequencies were analysed as described  
637 above and displayed using REVIGO’s treemap. The overrepresentation analysis was  
638 performed using GOrilla (Eden et al. 2009) with *Homo sapiens* as the organism background,  
639 using a *p*-value threshold of  $10^{-3}$  and REVIGO treemap (similarity factor “medium” of 0.7) for  
640 visualization.

641

## 642 **Analysis of specific gene families**

643           Genes and transcripts for each examined genome were identified by a tBLASTn search  
644 with an e-value cut-off at  $10^{-5}$  using the SequencerServer software (Priyam et al. 2015). This

645 was followed by a reciprocal BLAST using SmartBLAST (NCBI Resource Coordinators 2016),  
646 to confirm their identity.

647 Delta serrate ligand conserved protein domain (PF01414) was used to identify the  
648 corresponding proteins in tunicate genomes. To identify *Notch* receptor genes the conserved  
649 LNR (lin-notch repeat) domain (PF00066) was used. ALDH-like genes were identified by  
650 tBLASTn search (PF00171) and classified using SMART blast.

651

## 652 **Phylogenetics**

653 Sequences were aligned with ClustalX (Jeanmougin et al. 1998) before using ProtTest 3  
654 (Abascal et al. 2005) to determine the best-fit model of evolution. The best-fit model for the  
655 DSL phylogeny was WAG+I+G and, for CYP26 proteins, was LG+I+G.

656 Bayesian inference (BI) phylogenies were constructed using MrBayes (Ronquist and  
657 Huelsenbeck 2003) with a mixed model for 100,000 generations and summarized using a  
658 Sump burn-in of 200. Maximum Likelihood (ML) phylogenies were generated by PhyML  
659 (Guindon et al. 2010), using the estimated amino acid frequencies.

660 Accession numbers are provided in File S3 and sequence alignments are provided in  
661 Figure S3. Analyses carried out with BI and ML produced identical tree topologies.  
662 Trees were displayed using FigTree v1.4.2 (Rambaut 2016).

## 663 Acknowledgements

664 Funding support was provided to M.J.W. by the Otago BMS Deans Bequest and  
665 Department of Anatomy. S.B. was supported by the Swiss National Science Foundation (SNSF)  
666 grant number P2ELP3\_158873. We would like to thank Peter Maxwell and the New Zealand  
667 eScience Infrastructure (NeSI); Christelle Dantec and ANISEED for help and advice during the  
668 annotation process, as well as for the accompanying *B. leachii* genome browser.

669

## 670 Supplementary Figures

671

672 **Fig. S1.** SGA analysis. Including genome size estimation and de Bruijn graph quantification.

673

674 **Fig. S2.** Gene Ontology terms identified in the larger orthologs clusters between the tunicate  
675 genomes.

676

677 **Fig. S3.** Protein sequence alignments used to generate the Notch and RA phylogenies.

678

679

## 680 Supplementary Files

681

682 **File S1.** BUSCO scores for the *B. leachii* genome assembly

683

684 **File S2.** Results of Repeatmasker analysis using de novo repeat libraries (Repeatmodeler)

685

686 **File S3.** Results from OrthoMCL group including the REVIGO GO term listed each orthologue  
687 group, used in the comparison of the GO terms between the tunicate genomes.

688

689 **File S4.** BLASTp, GOrillia and REVIGO results used used for overrepresentation analysis of GO  
690 terms present in the *B. leachii* and *B. schlosseri* only orthologue group analysis.

691

692 **File S5.** Corresponding Gene and Transcript IDs for *B. leachii* genes of interest. Accession  
693 numbers for protein sequences used in phylogeny construction.

694

## 695 Supplementary Tables

696

697 **Table S1.** Repetitive elements identified in the *B. leachii* and *B. schlosseri* genomes using  
698 Repeatmoduler and RepeatMasker.

699

700 **Table S2.** Comparison of the number of Wnt pathway genes.

701

702 **Table S3.** Comparison of the number of Notch pathway genes.

703

704 **Table S4.** RA pathway components across annotated tunicate genomes.

705

706 **Table S5.** Iterative results of the meta-assembly approach followed for the *de novo* assembly  
707 of the *B. leachii* genome

708



709

## References

- 710 Abascal F, Zardoya R, Posada D. 2005. ProtTest: selection of best-fit models of protein evolution.  
711 *Bioinformatics* **21**: 2104–2105. [https://academic.oup.com/bioinformatics/article-](https://academic.oup.com/bioinformatics/article-lookup/doi/10.1093/bioinformatics/bti263)  
712 [lookup/doi/10.1093/bioinformatics/bti263](https://academic.oup.com/bioinformatics/article-lookup/doi/10.1093/bioinformatics/bti263).
- 713 Albalat R, Cañestro C. 2016. Evolution by gene loss. *Nat Rev Genet* **17**: 379–391.  
714 <http://www.nature.com/doifinder/10.1038/nrg.2016.39>.
- 715 Andrews S. 2010. FastQC: a quality control tool for high throughput sequence data.  
716 <http://www.bioinformatics.babraham.ac.uk/projects/fastqc>.
- 717 Auger H, Sasakura Y, Joly J-S, Jeffery WR. 2010. Regeneration of oral siphon pigment organs in  
718 the ascidian *Ciona intestinalis*. *Dev Biol* **339**: 374–389.  
719 <http://linkinghub.elsevier.com/retrieve/pii/S0012160609014651>.
- 720 Ballarin L, Franchini A, Ottaviani E, Sabbadin A. 2001. Morula cells as the major  
721 immunomodulatory hemocytes in ascidians: Evidences from the colonial species *Botryllus*  
722 *schlosseri*. *Biol Bull* **201**: 59–64.
- 723 Belyaeva O V., Chang C, Berlett MC, Kedishvili NY. 2015. Evolutionary origins of retinoid active  
724 short-chain dehydrogenases/reductases of SDR16C family. *Chem Biol Interact* **234**: 135–143.  
725 <http://linkinghub.elsevier.com/retrieve/pii/S000927971400324X>.
- 726 Belyaeva O V., Lee S-A, Kolupaev O V., Kedishvili NY. 2009. Identification and characterization  
727 of retinoid-active short-chain dehydrogenases/reductases in *Drosophila melanogaster*. *Biochim*  
728 *Biophys Acta - Gen Subj* **1790**: 1266–1273.  
729 <http://linkinghub.elsevier.com/retrieve/pii/S0304416509001688>.
- 730 Berna L, Alvarez-Valin F. 2014. Evolutionary genomics of fast evolving tunicates. *Genome Biol*  
731 *Evol* **6**: 1724–1738. <https://academic.oup.com/gbe/article-lookup/doi/10.1093/gbe/evu122>.
- 732 Berrill NJ. 1951. Regeneration and Budding in Tunicates. *Biol Rev* **26**: 456–475.  
733 <http://doi.wiley.com/10.1111/j.1469-185X.1951.tb01207.x>.
- 734 Berrill NJ. 1947. The developmental cycle of *Botrylloides*. *Q J Microsc Sci* **88**: 393–407.
- 735 Berrill NJ. 1941. The development of the bud in *Botryllus*. *Biol Bull* **80**: 169.  
736 <http://www.jstor.org/stable/1537595?origin=crossref>.
- 737 Bock DG, MacIsaac HJ, Cristescu ME. 2012. Multilocus genetic analyses differentiate between  
738 widespread and spatially restricted cryptic species in a model ascidian. *Proc R Soc B Biol Sci*  
739 **279**: 2377–2385. <http://rspb.royalsocietypublishing.org/cgi/doi/10.1098/rspb.2011.2610>.
- 740 Bolger AM, Lohse M, Usadel B. 2014. Trimmomatic: a flexible trimmer for Illumina sequence  
741 data. *Bioinformatics* **30**: 2114–2120.  
742 <http://bioinformatics.oxfordjournals.org/cgi/doi/10.1093/bioinformatics/btu170>.
- 743 Bostock M, Ogievetsky V, Heer J. 2011. D3: Data-Driven Documents. *IEEE Trans Vis Comput*  
744 *Graph*. <http://vis.stanford.edu/papers/d3>.
- 745 Bradnam KR, Fass JN, Alexandrov A, Baranay P, Bechner M, Birol I, Boisvert S, Chapman JA,  
746 Chapuis G, Chikhi R, et al. 2013. Assemblathon 2: evaluating de novo methods of genome  
747 assembly in three vertebrate species. *Gigascience* **2**: 10.  
748 <http://www.gigasciencejournal.com/content/2/1/10>.
- 749 Brown FD, Swalla BJ. 2012. Evolution and development of budding by stem cells: Ascidian  
750 coloniality as a case study. *Dev Biol* **369**: 151–162.  
751 <http://dx.doi.org/10.1016/j.ydbio.2012.05.038>.
- 752 Brozovic M, Martin C, Dantec C, Dauga D, Mendez M, Simion P, Percher M, Laporte B,  
753 Scornavacca C, Di Gregorio A, et al. 2016. ANISEED 2015: A digital framework for the  
754 comparative developmental biology of ascidians. *Nucleic Acids Res* **44**: D808–D818.
- 755 Brunetti R. 1976. Biological cycle of *Botrylloides leachi* (Savigny) (Asciacea) in the Venetian  
756 lagoon. *Vie Milieu* **XXVI**: 105–122.
- 757 Brunetti R. 1974. *Observations on the Life Cycle of Botryllus Schlosseri (Pallas) (Asciacea) in*

- 758 *the Venetian Lagoon*. <http://www.tandfonline.com/doi/abs/10.1080/11250007409430119>.
- 759 Brunetti R, Beghi L, Bressan M, Marin M. 1980. Combined effects of temperature and salinity on  
760 colonies of *Botryllus schlosseri* and *Botrylloides leachi* (Ascidiacea) from the Venetian  
761 Lagoon. *Mar Ecol Prog Ser* **2**: 303–314. [http://www.int-](http://www.int-res.com/articles/meps/2/m002p303.pdf)  
762 [res.com/articles/meps/2/m002p303.pdf](http://www.int-res.com/articles/meps/2/m002p303.pdf).
- 763 Brunetti R, Gissi C, Pennati R, Caicci F, Gasparini F, Manni L. 2015. Morphological evidence that  
764 the molecularly determined *Ciona intestinalis* type A and type B are different species: *Ciona*  
765 *robusta* and *Ciona intestinalis*. *J Zool Syst Evol Res* **53**: 186–193.  
766 <http://doi.wiley.com/10.1111/jzs.12101>.
- 767 Burighel P, Brunetti R, Zaniolo G. 1976. Hibernation of the colonial ascidian *Botrylloides leachi*  
768 (Savigny): histological observations. *Ital J Zool* **43**: 293–301.
- 769 Camacho C, Coulouris G, Avagyan V, Ma N, Papadopoulos J, Bealer K, Madden TL. 2009.  
770 BLAST+: architecture and applications. *BMC Bioinformatics* **10**: 421.  
771 <http://www.ncbi.nlm.nih.gov/pubmed/20003500>.
- 772 Cañestro C, Bassham S, Postlethwait J. 2005. Development of the central nervous system in the  
773 larvacean *Oikopleura dioica* and the evolution of the chordate brain. *Dev Biol* **285**: 298–315.  
774 <http://linkinghub.elsevier.com/retrieve/pii/S0012160605004410>.
- 775 Canestro C, Postlethwait JH, Gonzalez-Duarte R, Albalat R. 2006. Is retinoic acid genetic  
776 machinery a chordate innovation? *Evol Dev* **8**: 394–406. [http://doi.wiley.com/10.1111/j.1525-](http://doi.wiley.com/10.1111/j.1525-142X.2006.00113.x)  
777 [142X.2006.00113.x](http://doi.wiley.com/10.1111/j.1525-142X.2006.00113.x).
- 778 Chikhi R, Medvedev P. 2014. Informed and automated k-mer size selection for genome assembly.  
779 *Bioinformatics* **30**: 31–37.  
780 <http://bioinformatics.oxfordjournals.org/cgi/doi/10.1093/bioinformatics/btt310>.
- 781 Chillakuri CR, Sheppard D, Lea SM, Handford PA. 2012. Notch receptor–ligand binding and  
782 activation: Insights from molecular studies. *Semin Cell Dev Biol* **23**: 421–428.  
783 <http://linkinghub.elsevier.com/retrieve/pii/S1084952112000134>.
- 784 Cunningham TJ, Duester G. 2015. Mechanisms of retinoic acid signalling and its roles in organ and  
785 limb development. *Nat Rev Mol Cell Biol* **16**: 110–123.  
786 <http://www.nature.com/doi/finder/10.1038/nrm3932>.
- 787 Dehal P, Satou Y, Campbell RK, Chapman J, Degnan B, De Tomaso A, Davidson B, Di Gregorio  
788 A, Gelpke M, Goodstein DM, et al. 2002a. The Draft Genome of *Ciona intestinalis*: Insights  
789 into Chordate and Vertebrate Origins. *Science (80- )* **298**: 2157–2167.  
790 <http://www.sciencemag.org/content/298/5601/2157.abstract>.
- 791 Dehal P, Satou Y, Campbell RK, Chapman J, Degnan B, De Tomaso AW, Davidson B, Di Gregorio  
792 A, Gelpke M, Goodstein DM, et al. 2002b. The draft genome of *Ciona intestinalis*: insights  
793 into chordate and vertebrate origins. *Science* **298**: 2157–67.  
794 <http://www.ncbi.nlm.nih.gov/pubmed/12481130> (Accessed August 25, 2014).
- 795 Delcher AL, Harmon D, Kasif S, White O, Salzberg SL. 1999. Improved microbial gene  
796 identification with GLIMMER. *Nucleic Acids Res* **27**: 4636–41.  
797 <http://www.ncbi.nlm.nih.gov/pubmed/10556321>.
- 798 Delsuc F, Brinkmann H, Chourrout D, Philippe H. 2006. Tunicates and not cephalochordates are  
799 the closest living relatives of vertebrates. *Nature* **439**: 965–968.  
800 <http://www.ncbi.nlm.nih.gov/pubmed/16495997> (Accessed July 10, 2014).
- 801 Dobin A, Davis C a, Schlesinger F, Drenkow J, Zaleski C, Jha S, Batut P, Chaisson M, Gingeras  
802 TR. 2013. STAR: ultrafast universal RNA-seq aligner. *Bioinformatics* **29**: 15–21.  
803 <http://www.pubmedcentral.nih.gov/articlerender.fcgi?artid=3530905&tool=pmcentrez&render>  
804 [type=abstract](http://www.pubmedcentral.nih.gov/articlerender.fcgi?artid=3530905&tool=pmcentrez&render).
- 805 Eden E, Navon R, Steinfeld I, Lipson D, Yakhini Z. 2009. GOrilla: a tool for discovery and  
806 visualization of enriched GO terms in ranked gene lists. *BMC Bioinformatics* **10**: 48.  
807 <http://www.biomedcentral.com/1471-2105/10/48>.

- 808 Edvardsen RB, Seo H-C, Jensen MF, Mialon A, Mikhaleva J, Bjordal M, Cartry J, Reinhardt R,  
809 Weissenbach J, Wincker P, et al. 2005. Remodelling of the homeobox gene complement in the  
810 tunicate *Oikopleura dioica*. *Curr Biol* **15**: R12–R13.  
811 <http://linkinghub.elsevier.com/retrieve/pii/S096098220400973X>.
- 812 Ewels P, Magnusson M, Lundin S, Källér M. 2016. MultiQC: Summarize analysis results for  
813 multiple tools and samples in a single report. *Bioinformatics* btw354.
- 814 Franchi N, Schiavon F, Carletto M, Gasparini F, Bertoloni G, Tosatto SCE, Ballarin L. 2011.  
815 Immune roles of a rhamnose-binding lectin in the colonial ascidian *Botryllus schlosseri*.  
816 *Immunobiology* **216**: 725–736.  
817 <http://linkinghub.elsevier.com/retrieve/pii/S0171298510001993>.
- 818 Garcia-Fernández J. 2005. The genesis and evolution of homeobox gene clusters. *Nat Rev Genet* **6**:  
819 881–92. <http://www.ncbi.nlm.nih.gov/pubmed/16341069>.
- 820 Gasparini F, Burighel P, Manni L, Zaniolo G. 2008. Vascular regeneration and angiogenic-like  
821 sprouting mechanism in a compound ascidian is similar to vertebrates. *Evol Dev* **10**: 591–605.
- 822 Gazave E, Lapébie P, Richards GS, Brunet F, Ereskovsky A V, Degnan BM, Borchiellini C,  
823 Vervoort M, Renard E. 2009. Origin and evolution of the Notch signalling pathway: an  
824 overview from eukaryotic genomes. *BMC Evol Biol* **9**: 249.  
825 <http://bmcevolbiol.biomedcentral.com/articles/10.1186/1471-2148-9-249>.
- 826 Gissi C, Hastings KEM, Gasparini F, Stach T, Pennati R, Manni L. 2017. An unprecedented  
827 taxonomic revision of a model organism: the paradigmatic case of *Ciona robusta* and *Ciona*  
828 *intestinalis*. *Zool Scr*. <http://doi.wiley.com/10.1111/zsc.12233>.
- 829 Gnerre S, MacCallum I, Przybylski D, Ribeiro FJ, Burton JN, Walker BJ, Sharpe T, Hall G, Shea  
830 TP, Sykes S, et al. 2011. High-quality draft assemblies of mammalian genomes from  
831 massively parallel sequence data. *Proc Natl Acad Sci* **108**: 1513–1518.  
832 <http://www.pnas.org/cgi/doi/10.1073/pnas.1017351108>.
- 833 Griggio F, Voskoboinik A, Iannelli F, Justy F, Tilak M-KM-K, Xavier T, Pesole G, Douzery EJP,  
834 Mastrototaro F, Gissi C. 2014. Ascidian Mitogenomics: Comparison of Evolutionary Rates in  
835 Closely Related Taxa Provides Evidence of Ongoing Speciation Events. *Genome Biol Evol* **6**:  
836 591–605. <https://academic.oup.com/gbe/article-lookup/doi/10.1093/gbe/evu041>.
- 837 Grigoriev I V., Nordberg H, Shabalov I, Aerts A, Cantor M, Goodstein D, Kuo A, Minovitsky S,  
838 Nikitin R, Ohm RA, et al. 2012. The Genome Portal of the Department of Energy Joint  
839 Genome Institute. *Nucleic Acids Res* **40**: D26–D32. <https://academic.oup.com/nar/article-lookup/doi/10.1093/nar/gkr947>.
- 840
- 841 Guder C, Philipp I, Lengfeld T, Watanabe H, Hobmayer B, Holstein TW. 2006. The Wnt code:  
842 cnidarians signal the way. *Oncogene* **25**: 7450–7460.  
843 <http://www.nature.com/doi/finder/10.1038/sj.onc.1210052>.
- 844 Guindon S, Dufayard JF, Lefort V, Anisimova M, Hordijk W, Gascuel O. 2010. New Algorithms  
845 and Methods to Estimate Maximum-Likelihood Phylogenies: Assessing the Performance of  
846 PhyML 3.0. *Syst Biol* **59**: 307–321. <https://academic.oup.com/sysbio/article-lookup/doi/10.1093/sysbio/syq010>.
- 847
- 848 Guruharsha KG, Kankel MW, Artavanis-Tsakonas S. 2012. The Notch signalling system: recent  
849 insights into the complexity of a conserved pathway. *Nat Rev Genet* **13**: 654–666.  
850 <http://www.nature.com/doi/finder/10.1038/nrg3272>.
- 851 Gutierrez S, Brown FD. 2017. Vascular budding in *Symplegma brakenhielmi* and the evolution of  
852 coloniality in styelid ascidians. *Dev Biol* **423**: 152–169.  
853 <http://dx.doi.org/10.1016/j.ydbio.2017.01.012>.
- 854 Hamada M, Goricki S, Byerly MS, Satoh N, Jeffery WR. 2015. Evolution of the chordate  
855 regeneration blastema: Differential gene expression and conserved role of notch signaling  
856 during siphon regeneration in the ascidian *Ciona*. *Dev Biol* **405**: 304–315.  
857 <http://linkinghub.elsevier.com/retrieve/pii/S0012160615300701>.

- 858 Hoegg S, Meyer A. 2005. Hox clusters as models for vertebrate genome evolution. *Trends Genet*  
859 **21**: 421–424. <http://linkinghub.elsevier.com/retrieve/pii/S0168952505001654>.
- 860 Holt C, Yandell M. 2011. MAKER2: an annotation pipeline and genome-database management tool  
861 for second-generation genome projects. *BMC Bioinformatics* **12**: 491.
- 862 Ikuta T, Satoh N, Saiga H. 2010. Limited functions of Hox genes in the larval development of the  
863 ascidian *Ciona intestinalis*. *Development* **137**: 1505–1513.  
864 <http://dev.biologists.org/cgi/doi/10.1242/dev.046938>.
- 865 Iwasa T, Mishima S, Watari A, Ohkuma M, Azuma T, Kanehara K, Tsuda M. 2003. A novel G  
866 protein alpha subunit in embryo of the ascidian, *Halocynthia roretzi*. *Zoolog Sci* **20**: 141–51.  
867 <http://www.ncbi.nlm.nih.gov/pubmed/12655177>.
- 868 Jackson B, Brocker C, Thompson DC, Black W, Vasiliou K, Nebert DW, Vasiliou V. 2011. Update  
869 on the aldehyde dehydrogenase gene (ALDH) superfamily. *Hum Genomics* **5**: 283–303.  
870 <http://www.ncbi.nlm.nih.gov/pubmed/21712190>.
- 871 Janssen R, Le Gouar M, Pechmann M, Poulin F, Bolognesi R, Schwager EE, Hopfen C, Colbourne  
872 JK, Budd GE, Brown SJ, et al. 2010. Conservation, loss, and redeployment of Wnt ligands in  
873 protostomes: implications for understanding the evolution of segment formation. *BMC Evol*  
874 *Biol* **10**: 374. <http://bmcevolbiol.biomedcentral.com/articles/10.1186/1471-2148-10-374>.
- 875 Jeanmougin F, Thompson JD, Gouy M, Higgins DG, Gibson TJ. 1998. Multiple sequence  
876 alignment with Clustal X. *Trends Biochem Sci* **23**: 403–5.  
877 <http://www.ncbi.nlm.nih.gov/pubmed/9810230>.
- 878 Jeffery WR. 2015. Regeneration, Stem Cells, and Aging in the Tunicate *Ciona*: Insights from the  
879 Oral Siphon. *Int Rev Cell Mol Biol* **319**: 255–82.  
880 <http://linkinghub.elsevier.com/retrieve/pii/S1937644815000581>.
- 881 Jones P, Binns D, Chang HY, Fraser M, Li W, McAnulla C, McWilliam H, Maslen J, Mitchell A,  
882 Nuka G, et al. 2014. InterProScan 5: Genome-scale protein function classification.  
883 *Bioinformatics* **30**: 1236–1240.
- 884 Kent WJ. 2002. BLAT--the BLAST-like alignment tool. *Genome Res* **12**: 656–64.  
885 <http://www.ncbi.nlm.nih.gov/pubmed/11932250>.
- 886 Korf I. 2004. Gene finding in novel genomes. *BMC Bioinformatics* **5**: 59.
- 887 Kürn U, Rendulic S, Tiozzo S, Lauzon RJ. 2011. Asexual propagation and regeneration in colonial  
888 ascidians. *Biol Bull* **221**: 43–61. <http://www.ncbi.nlm.nih.gov/pubmed/21876110>.
- 889 Kusserow A, Pang K, Sturm C, Hroudá M, Lentfer J, Schmidt HA, Technau U, von Haeseler A,  
890 Hobmayer B, Martindale MQ, et al. 2005. Unexpected complexity of the Wnt gene family in a  
891 sea anemone. *Nature* **433**: 156–160. <http://www.nature.com/doi/10.1038/nature03158>.
- 892 Lauzon RJ, Brown C, Kerr L, Tiozzo S. 2013. Phagocyte dynamics in a highly regenerative  
893 urochordate: insights into development and host defense. *Dev Biol* **374**: 357–73.  
894 <http://www.ncbi.nlm.nih.gov/pubmed/23174529> (Accessed March 31, 2014).
- 895 Lee S-A, Belyaeva O V., Kedishvili NY. 2009. Biochemical characterization of human epidermal  
896 retinol dehydrogenase 2. *Chem Biol Interact* **178**: 182–7.  
897 <http://www.ncbi.nlm.nih.gov/pubmed/18926804>.
- 898 Lemaire P, Smith WC, Nishida H. 2008. Ascidians and the plasticity of the chordate developmental  
899 program. *Curr Biol* **18**: R620-31. <http://www.ncbi.nlm.nih.gov/pubmed/18644342>.
- 900 Li L, Stoeckert CJ, Roos DS. 2003. OrthoMCL: identification of ortholog groups for eukaryotic  
901 genomes. *Genome Res* **13**: 2178–89. <http://www.genome.org/cgi/doi/10.1101/gr.1224503>.
- 902 Loh KM, van Amerongen R, Nusse R. 2016. Generating Cellular Diversity and Spatial Form: Wnt  
903 Signaling and the Evolution of Multicellular Animals. *Dev Cell* **38**: 643–655.  
904 <http://linkinghub.elsevier.com/retrieve/pii/S153458071630586X>.
- 905 Lowe TM. 1999. A Computational Screen for Methylation Guide snoRNAs in Yeast. *Science (80- )*  
906 **283**: 1168–1171. <http://www.sciencemag.org/cgi/doi/10.1126/science.283.5405.1168>.
- 907 Lowe TM, Eddy SR. 1997. tRNAscan-SE: A program for improved detection of transfer RNA



- 908 genes in genomic sequence. *Nucleic Acids Res* **25**: 955–964.
- 909 Luke GN, Castro LFC, McLay K, Bird C, Coulson A, Holland PWH. 2003. Dispersal of NK  
910 homeobox gene clusters in amphioxus and humans. *Proc Natl Acad Sci* **100**: 5292–5295.  
911 <http://www.pnas.org/cgi/doi/10.1073/pnas.0836141100>.
- 912 Luo R, Liu B, Xie Y, Li Z, Huang W, Yuan J, He G, Chen Y, Pan Q, Liu Y, et al. 2012.  
913 SOAPdenovo2: an empirically improved memory-efficient short-read de novo assembler.  
914 *Gigascience* **1**: 18. <http://www.gigasciencejournal.com/content/1/1/18>.
- 915 MacDonald BT, Tamai K, He X. 2009. Wnt/ $\beta$ -Catenin Signaling: Components, Mechanisms, and  
916 Diseases. *Dev Cell* **17**: 9–26. <http://linkinghub.elsevier.com/retrieve/pii/S1534580709002573>.
- 917 Manni L, Zaniolo G, Cima F, Burighel P, Ballarin L. 2007. *Botryllus schlosseri*: a model ascidian  
918 for the study of asexual reproduction. *Dev Dyn* **236**: 335–52.  
919 <http://www.ncbi.nlm.nih.gov/pubmed/17191252> (Accessed March 31, 2014).
- 920 Martí-Solans J, Belyaeva O V., Torres-Aguila NP, Kedishvili NY, Albalat R, Cañestro C. 2016.  
921 Coelimitation and Survival in Gene Network Evolution: Dismantling the RA-Signaling in a  
922 Chordate. *Mol Biol Evol* **33**: 2401–2416. [https://academic.oup.com/mbe/article-](https://academic.oup.com/mbe/article-lookup/doi/10.1093/molbev/msw118)  
923 [lookup/doi/10.1093/molbev/msw118](https://academic.oup.com/mbe/article-lookup/doi/10.1093/molbev/msw118).
- 924 Martin A, Maher S, Summerhurst K, Davidson D, Murphy P. 2012. Differential deployment of  
925 paralogous Wnt genes in the mouse and chick embryo during development. *Evol Dev* **14**: 178–  
926 195. <http://doi.wiley.com/10.1111/j.1525-142X.2012.00534.x>.
- 927 Maumus F, Quesneville H. 2014. Ancestral repeats have shaped epigenome and genome  
928 composition for millions of years in *Arabidopsis thaliana*. *Nat Commun* **5**.  
929 <http://www.nature.com/doi/finder/10.1038/ncomms5104>.
- 930 Millar RH. 1971. The biology of ascidians. *Adv Mar Biol* **9**: 1–100.
- 931 Mukai H, Sugimoto K, Taneda Y. 1978. Comparative studies on the circulatory system of the  
932 compound ascidians, *Botryllus*, *Botrylloides* and *Symplegma*. *J Morphol* **157**: 49–78.
- 933 Murata Y, Okado H, Kubo Y. 2001. Characterization of heteromultimeric G protein-coupled  
934 inwardly rectifying potassium channels of the tunicate tadpole with a unique pore property. *J*  
935 *Biol Chem* **276**: 18529–39. <http://www.ncbi.nlm.nih.gov/pubmed/11278535>.
- 936 Nawrocki EP, Burge SW, Bateman A, Daub J, Eberhardt RY, Eddy SR, Floden EW, Gardner PP,  
937 Jones TA, Tate J, et al. 2015. Rfam 12.0: Updates to the RNA families database. *Nucleic Acids*  
938 *Res* **43**: D130–D137.
- 939 Nawrocki EP, Eddy SR. 2013. Infernal 1.1: 100-fold faster RNA homology searches.  
940 *Bioinformatics* **29**: 2933–2935.
- 941 NCBI Resource Coordinators. 2016. Database resources of the National Center for Biotechnology  
942 Information. *Nucleic Acids Res* **44**: D7–19. <http://www.ncbi.nlm.nih.gov/pubmed/26615191>.
- 943 Nishida H. 2005. Specification of embryonic axis and mosaic development in ascidians. *Dev Dyn*  
944 **233**: 1177–1193. <http://doi.wiley.com/10.1002/dvdy.20469>.
- 945 Nydam ML, Giesbrecht KB, Stephenson EE. 2017. Origin and Dispersal History of Two Colonial  
946 Ascidian Clades in the *Botryllus schlosseri* Species Complex ed. T.-Y. Chiang. *PLoS One* **12**:  
947 e0169944. <http://dx.plos.org/10.1371/journal.pone.0169944>.
- 948 O’Connell J, Schulz-Trieglaff O, Carlson E, Hims MM, Gormley N a., Cox a. J. 2015. NxTrim:  
949 optimized trimming of Illumina mate pair reads. *Bioinformatics* **31**: btv057.  
950 [http://bioinformatics.oxfordjournals.org/content/early/2015/02/05/bioinformatics.btv057.short?](http://bioinformatics.oxfordjournals.org/content/early/2015/02/05/bioinformatics.btv057.short?rss=1)  
951 [rss=1](http://bioinformatics.oxfordjournals.org/content/early/2015/02/05/bioinformatics.btv057.short?rss=1).
- 952 O’Neill RJ, O’Neill MJ, Graves JA. 1998. Undermethylation associated with retroelement  
953 activation and chromosome remodelling in an interspecific mammalian hybrid. *Nature* **393**:  
954 68–72. <http://www.nature.com/doi/finder/10.1038/29985>.
- 955 Oka H, Watanabe H. 1957. Vascular budding, a new type of budding in *Botryllus*. *Biol Bull* **112**:  
956 225. <http://www.jstor.org/stable/10.2307/1539200?origin=crossref>.
- 957 Pascual-Anaya J, D’Aniello S, Kuratani S, Garcia-Fernández J. 2013. Evolution of Hox gene

- 958 clusters in deuterostomes. *BMC Dev Biol* **13**: 26.  
959 <http://bmcdevbiol.biomedcentral.com/articles/10.1186/1471-213X-13-26>.
- 960 Pearson JC, Lemons D, McGinnis W. 2005. Modulating Hox gene functions during animal body  
961 patterning. *Nat Rev Genet* **6**: 893–904. <http://www.ncbi.nlm.nih.gov/pubmed/16341070>.
- 962 Philips A, Blein M, Robert A, Chambon J-P, Baghdiguian S, Weill M, Fort P. 2003. Ascidi-  
963 ans as a vertebrate-like model organism for physiological studies of Rho GTPase signaling. *Biol cell*  
964 **95**: 295–302. <http://www.ncbi.nlm.nih.gov/pubmed/12941527>.
- 965 Piette J, Lemaire P. 2015. Thaliaceans, The Neglected Pelagic Relatives of Ascidi-  
966 ans: A Developmental and Evolutionary Enigma. *Q Rev Biol* **90**: 117–145.  
967 <http://www.journals.uchicago.edu/doi/10.1086/669266>.
- 968 Primmer CR, Papakostas S, Leder EH, Davis MJ, Ragan MA. 2013. Annotated genes and  
969 nonannotated genomes: cross-species use of Gene Ontology in ecology and evolution research.  
970 *Mol Ecol* **22**: 3216–3241. <http://doi.wiley.com/10.1111/mec.12309>.
- 971 Priyam A, Woodcroft BJ, Rai V, Munagala A, Moghul I, Ter F, Gibbins MA, Moon H, Leonard G,  
972 Rumpf W, et al. 2015. Sequenceserver: a modern graphical user interface for custom BLAST  
973 databases. *bioRxiv*. <http://biorxiv.org/content/early/2015/11/27/033142.abstract>.
- 974 Prud'homme B, Lartillot N, Balavoine G, Adoutte A, Vervoort M. 2002. Phylogenetic analysis of  
975 the Wnt gene family. Insights from lophotrochozoan members. *Curr Biol* **12**: 1395.  
976 <http://www.sciencedirect.com/science/article/pii/S0960982202010680>.
- 977 Rambaut A. 2016. FigTree. <http://tree.bio.ed.ac.uk/software/figtree/>.
- 978 Rinkevich B, Shlemberg Z, Fishelson L. 1995. Whole-body protochordate regeneration from  
979 totipotent blood cells. *Proc Natl Acad Sci U S A* **92**: 7695–9.  
980 <http://www.pubmedcentral.nih.gov/articlerender.fcgi?artid=41212&tool=pmcentrez&renderty>  
981 [pe=abstract](http://www.pubmedcentral.nih.gov/articlerender.fcgi?artid=41212&tool=pmcentrez&renderty) (Accessed March 31, 2014).
- 982 Rinkevich Y, Douek J, Haber O, Rinkevich B, Reshef R. 2007a. Urochordate whole body  
983 regeneration inaugurates a diverse innate immune signaling profile. *Dev Biol* **312**: 131–46.  
984 <http://www.ncbi.nlm.nih.gov/pubmed/17964563> (Accessed March 31, 2014).
- 985 Rinkevich Y, Paz G, Rinkevich B, Reshef R. 2007b. Systemic bud induction and retinoic acid  
986 signaling underlie whole body regeneration in the urochordate *Botrylloides leachi*. *PLoS Biol*  
987 **5**: e71.  
988 <http://www.pubmedcentral.nih.gov/articlerender.fcgi?artid=1808485&tool=pmcentrez&render>  
989 [type=abstract](http://www.pubmedcentral.nih.gov/articlerender.fcgi?artid=1808485&tool=pmcentrez&render) (Accessed March 31, 2014).
- 990 Rinkevich Y, Rinkevich B, Reshef R. 2008. Cell signaling and transcription factor genes expressed  
991 during whole body regeneration in a colonial chordate. *BMC Dev Biol* **8**: 100.  
992 <http://www.pubmedcentral.nih.gov/articlerender.fcgi?artid=2576188&tool=pmcentrez&render>  
993 [type=abstract](http://www.pubmedcentral.nih.gov/articlerender.fcgi?artid=2576188&tool=pmcentrez&render) (Accessed March 20, 2014).
- 994 Rinkevich Y, Voskoboinik A, Rosner A, Rabinowitz C, Paz G, Oren M, Douek J, Alfassi G,  
995 Moiseeva E, Ishizuka KJ, et al. 2013. Repeated, long-term cycling of putative stem cells  
996 between niches in a basal chordate. *Dev Cell* **24**: 76–88.  
997 <http://www.pubmedcentral.nih.gov/articlerender.fcgi?artid=3810298&tool=pmcentrez&render>  
998 [type=abstract](http://www.pubmedcentral.nih.gov/articlerender.fcgi?artid=3810298&tool=pmcentrez&render) (Accessed March 30, 2014).
- 999 Ronquist F, Huelsenbeck JP. 2003. MrBayes 3: Bayesian phylogenetic inference under mixed  
1000 models. *Bioinformatics* **19**: 1572–4. <http://www.ncbi.nlm.nih.gov/pubmed/12912839>.
- 1001 Ross AC, Zolfaghari R. 2011. Cytochrome P450s in the regulation of cellular retinoic acid  
1002 metabolism. *Annu Rev Nutr* **31**: 65–87. <http://www.ncbi.nlm.nih.gov/pubmed/21529158>.
- 1003 Rubinstein ND, Feldstein T, Shenkar N, Botero-Castro F, Griggio F, Mastrototaro F, Delsuc F,  
1004 Douzery EJP, Gissi C, Huchon D. 2013. Deep sequencing of mixed total DNA without  
1005 barcodes allows efficient assembly of highly plastic Ascidian mitochondrial genomes. *Genome*  
1006 *Biol Evol* **5**: 1185–1199. <http://www.ncbi.nlm.nih.gov/pubmed/23709623>.
- 1007 Sabbadin A, Zaniolo G, Majone F. 1975. Determination of polarity and bilateral asymmetry in

- 1008       palleal and vascular buds of the ascidian *Botryllus schlosseri*. *Dev Biol* **46**: 79–87.
- 1009 Saito Y, Shirae M, Okuyama M, Cohen S. 2001. Phylogeny of Botryllid Ascidians. In *The Biology*  
1010 *of Ascidians*, pp. 315–320, Springer Japan, Tokyo [http://link.springer.com/10.1007/978-4-431-](http://link.springer.com/10.1007/978-4-431-66982-1_50)  
1011 [66982-1\\_50](http://link.springer.com/10.1007/978-4-431-66982-1_50).
- 1012 Santagati F, Abe K, Schmidt V, Schmitt-John T, Suzuki M, Yamamura K-I, Imai K. 2003.  
1013 Identification of Cis-regulatory elements in the mouse Pax9/Nkx2-9 genomic region:  
1014 implication for evolutionary conserved synteny. *Genetics* **165**: 235–42.  
1015 <http://www.ncbi.nlm.nih.gov/pubmed/14504231>.
- 1016 Sattler S. 2017. The Role of the Immune System Beyond the Fight Against Infection. In *The*  
1017 *Immunology of Cardiovascular Homeostasis and Pathology* (eds. S. Sattler and T. Kennedy-  
1018 Lydon), pp. 3–14, Springer International Publishing [http://link.springer.com/10.1007/978-3-](http://link.springer.com/10.1007/978-3-319-57613-8_1)  
1019 [319-57613-8\\_1](http://link.springer.com/10.1007/978-3-319-57613-8_1).
- 1020 Savigny J-C. 1816. *Mémoires sur les animaux sans vertèbres*. Dufour, G., Paris  
1021 <http://www.biodiversitylibrary.org/bibliography/9154>.
- 1022 Seo H-CC, Kube M, Edvardsen RB, Jensen MF, Beck A, Spriet E, Gorsky G, Thompson EM,  
1023 Lehrach H, Reinhardt R, et al. 2001. Miniature genome in the marine chordate *Oikopleura*  
1024 *dioica*. *Science* **294**: 2506. <http://www.sciencemag.org/content/294/5551/2506.short>.
- 1025 Simakov O, Kawashima T, Marlétaz F, Jenkins J, Koyanagi R, Mitros T, Hisata K, Bredeson J,  
1026 Shoguchi E, Gyoja F, et al. 2015. Hemichordate genomes and deuterostome origins. *Nature*  
1027 **527**: 459–465. <http://www.nature.com/doi/10.1038/nature16150>.
- 1028 Simão FA, Waterhouse RM, Ioannidis P, Kriventseva E V. 2015. BUSCO : assessing genome  
1029 assembly and annotation completeness with single-copy orthologs. *Genome Anal* **9**–10.
- 1030 Simmen MW, Leitgeb S, Charlton J, Jones SJ, Harris BR, Clark VH, Bird A. 1999. Nonmethylated  
1031 transposable elements and methylated genes in a chordate genome. *Science* **283**: 1164–7.  
1032 <http://www.ncbi.nlm.nih.gov/pubmed/10024242>.
- 1033 Simpson JT. 2014. Exploring genome characteristics and sequence quality without a reference.  
1034 *Bioinformatics* **30**: 1228–1235.
- 1035 Simpson JT, Wong K, Jackman SD, Schein JE, Jones SJM, Birol I. 2009. ABySS: A parallel  
1036 assembler for short read sequence data. *Genome Res* **19**: 1117–1123.  
1037 <http://genome.cshlp.org/cgi/doi/10.1101/gr.089532.108>.
- 1038 Small KS, Brudno M, Hill MM, Sidow A. 2007. A haplome alignment and reference sequence of  
1039 the highly polymorphic *Ciona savignyi* genome. *Genome Biol* **8**: R41.  
1040 <http://genomebiology.biomedcentral.com/articles/10.1186/gb-2007-8-3-r41>.
- 1041 Smit A, Hubley R. 2015. RepeatModeler Open-1.0.
- 1042 Smit A, Hubley R, Green P. 2015. RepeatMasker Open-4.0.
- 1043 Sobreira TJP, Marletaz F, Simoes-Costa M, Schechtman D, Pereira AC, Brunet F, Sweeney S, Pani  
1044 A, Aronowicz J, Lowe CJ, et al. 2011. Structural shifts of aldehyde dehydrogenase enzymes  
1045 were instrumental for the early evolution of retinoid-dependent axial patterning in metazoans.  
1046 *Proc Natl Acad Sci* **108**: 226–231. <http://www.pnas.org/cgi/doi/10.1073/pnas.1011223108>.
- 1047 Somorjai IML, Escrivà H, Garcia-Fernández J. 2012. Amphioxus makes the cut—Again. *Commun*  
1048 *Integr Biol* **5**: 499–502. <http://www.tandfonline.com/doi/abs/10.4161/cib.21075>.
- 1049 Spagnuolo A, Ristatore F, Di Gregorio A, Aniello F, Branno M, Di Lauro R. 2003. Unusual  
1050 number and genomic organization of Hox genes in the tunicate *Ciona intestinalis*. *Gene* **309**:  
1051 71–9. <http://www.ncbi.nlm.nih.gov/pubmed/12758123>.
- 1052 Stanke M, Waack S. 2003. Gene prediction with a hidden Markov model and a new intron  
1053 submodel. *Bioinformatics* **19**: 215–225.
- 1054 Stapley J, Santure AW, Dennis SR. 2015. Transposable elements as agents of rapid adaptation may  
1055 explain the genetic paradox of invasive species. *Mol Ecol* **24**: 2241–2252.  
1056 <http://doi.wiley.com/10.1111/mec.13089>.
- 1057 Stoick-Cooper CL, Weidinger G, Riehle KJ, Hubbert C, Major MB, Fausto N, Moon RT. 2007.

- 1058 Distinct Wnt signaling pathways have opposing roles in appendage regeneration. *Development*  
1059 **134**: 479–89. <http://dev.biologists.org/cgi/doi/10.1242/dev.001123>.
- 1060 Stolfi A, Lowe EK, Racioppi C, Ristoratore F, Brown CT, Swalla BJ, Christiaen L. 2014. Divergent  
1061 mechanisms regulate conserved cardiopharyngeal development and gene expression in  
1062 distantly related ascidians. *Elife* **3**: e03728.
- 1063 Supek F, Bošnjak M, Škunca N, Šmuc T. 2011. REVIGO Summarizes and Visualizes Long Lists of  
1064 Gene Ontology Terms ed. C. Gibas. *PLoS One* **6**: e21800.  
1065 <http://dx.plos.org/10.1371/journal.pone.0021800>.
- 1066 Suzuki MM, Kerr ARW, De Sousa D, Bird A. 2007. CpG methylation is targeted to transcription  
1067 units in an invertebrate genome. *Genome Res* **17**: 625–631.  
1068 <http://www.genome.org/cgi/doi/10.1101/gr.6163007>.
- 1069 Takatori N, Butts T, Candiani S, Pestarino M, Ferrier DEK, Saiga H, Holland PWH. 2008.  
1070 Comprehensive survey and classification of homeobox genes in the genome of amphioxus,  
1071 *Branchiostoma floridae*. *Dev Genes Evol* **218**: 579–590.  
1072 <http://link.springer.com/10.1007/s00427-008-0245-9>.
- 1073 Taketa DA, Nydam ML, Langenbacher AD, Rodriguez D, Sanders E, De Tomaso AW. 2015.  
1074 Molecular evolution and in vitro characterization of Botryllus histocompatibility factor.  
1075 *Immunogenetics* **67**: 605–623. <http://link.springer.com/10.1007/s00251-015-0870-1>.
- 1076 Tassy O, Dauga D, Daian F, Sobral D, Robin F, Khoueiry P, Salgado D, Fox V, Caillol D, Schiappa  
1077 R, et al. 2010. The ANISEED database: Digital representation, formalization, and elucidation  
1078 of a chordate developmental program. *Genome Res* **20**: 1459–1468.  
1079 <http://genome.cshlp.org/cgi/doi/10.1101/gr.108175.110>.
- 1080 The Gene Ontology Consortium. 2015. Gene Ontology Consortium: going forward. *Nucleic Acids*  
1081 *Res* **43**: D1049–D1056. <https://academic.oup.com/nar/article-lookup/doi/10.1093/nar/gku1179>.
- 1082 Tsagkogeorga G, Cahais V, Galtier N. 2012. The Population Genomics of a Fast Evolver: High  
1083 Levels of Diversity, Functional Constraint, and Molecular Adaptation in the Tunicate *Ciona*  
1084 *intestinalis*. *Genome Biol Evol* **4**: 852–861. <https://academic.oup.com/gbe/article-lookup/doi/10.1093/gbe/evs054>.
- 1085 Tsagkogeorga G, Turon X, Galtier N, Douzery EJP, Delsuc F. 2010. Accelerated Evolutionary Rate  
1086 of Housekeeping Genes in Tunicates. *J Mol Evol* **71**: 153–167.  
1087 <http://link.springer.com/10.1007/s00239-010-9372-9>.
- 1088 UniProt Consortium. 2015. UniProt: a hub for protein information. *Nucleic Acids Res* **43**: D204–  
1089 D212. <https://academic.oup.com/nar/article-lookup/doi/10.1093/nar/gku989>.
- 1090 Voskoboynik A, Neff NF, Sahoo D, Newman AM, Pushkarev D, Koh W, Passarelli B, Fan HC,  
1091 Mantalas GL, Palmeri KJ, et al. 2013a. The genome sequence of the colonial chordate,  
1092 *Botryllus schlosseri*. *Elife* **2**: 1–24. <http://elifesciences.org/lookup/doi/10.7554/eLife.00569>.
- 1093 Voskoboynik A, Newman AM, Corey DM, Sahoo D, Pushkarev D, Neff NF, Passarelli B, Koh W,  
1094 Ishizuka KJ, Palmeri KJ, et al. 2013b. Identification of a Colonial Chordate Histocompatibility  
1095 Gene. *Science (80- )* **341**: 384–387.  
1096 <http://www.sciencemag.org/cgi/doi/10.1126/science.1238036>.
- 1097 Voskoboynik A, Simon-Blecher N, Soen Y, Rinkevich B, De Tomaso AW, Ishizuka KJ, Weissman  
1098 IL. 2007. Striving for normality: whole body regeneration through a series of abnormal  
1099 generations. *FASEB J* **21**: 1335–44. <http://www.ncbi.nlm.nih.gov/pubmed/17289924>  
1100 (Accessed March 31, 2014).
- 1101 Wada S, Tokuoka M, Shoguchi E, Kobayashi K, Di Gregorio A, Spagnuolo A, Branno M, Kohara  
1102 Y, Rokhsar D, Levine M, et al. 2003. A genomewide survey of developmentally relevant genes  
1103 in *Ciona intestinalis*. *Dev Genes Evol* **213**: 222–234. <http://link.springer.com/10.1007/s00427-003-0321-0>.
- 1104 Wang X-P, Suomalainen M, Felszeghy S, Zelarayan LC, Alonso MT, Plikus M V, Maas RL,  
1105 Chuong C-M, Schimmang T, Thesleff I. 2007. An integrated gene regulatory network controls  
1106  
1107



- 1108 stem cell proliferation in teeth. *PLoS Biol* **5**: e159.  
1109 <http://www.pubmedcentral.nih.gov/articlerender.fcgi?artid=1885832&tool=pmcentrez&render>  
1110 [type=abstract](http://www.pubmedcentral.nih.gov/articlerender.fcgi?artid=1885832&tool=pmcentrez&render) (Accessed October 28, 2010).
- 1111 Wences AH, Schatz MC. 2015. Metassembler: merging and optimizing de novo genome  
1112 assemblies. *Genome Biol* **16**: 207. <http://genomebiology.com/2015/16/1/207>.
- 1113 Zerbino DR, Birney E. 2008. Velvet: algorithms for de novo short read assembly using de Bruijn  
1114 graphs. *Genome Res* **18**: 821–9. <http://www.ncbi.nlm.nih.gov/pubmed/18349386>.
- 1115 Zhan A, Briski E, Bock DG, Ghabooli S, MacIsaac HJ. 2015. Ascidiens as models for studying  
1116 invasion success. *Mar Biol* **162**. <http://link.springer.com/10.1007/s00227-015-2734-5>.
- 1117 Zhang G, Fang X, Guo X, Li L, Luo R, Xu F, Yang P, Zhang L, Wang X, Qi H, et al. 2012. The  
1118 oyster genome reveals stress adaptation and complexity of shell formation. *Nature* **490**: 49–54.  
1119 <http://dx.doi.org/10.1038/nature11413>.
- 1120 Zimin A V., Marcais G, Puiu D, Roberts M, Salzberg SL, Yorke JA. 2013. The MaSuRCA genome  
1121 assembler. *Bioinformatics* **29**: 2669–2677.  
1122 <http://bioinformatics.oxfordjournals.org/cgi/doi/10.1093/bioinformatics/btt476>.
- 1123 Zondag LE, Rutherford K, Gemmell NJ, Wilson MJ. 2016. Uncovering the pathways underlying  
1124 whole body regeneration in a chordate model, *Botrylloides leachi* using de novo transcriptome  
1125 analysis. *BMC Genomics* **17**: 114. <http://www.biomedcentral.com/1471-2164/17/114>.  
1126



222 ***Ancient gene linkages are fragmented in tunicate genomes***

223

224 Ancient gene linkages are highly conserved sets of genes that are spatially restricted,  
225 commonly occurring in clusters (Garcia-Fernàndez 2005). These clusters arose in a common  
226 ancestor and were preserved because of a common regulatory mechanism such as cis-  
227 regulatory elements located within the cluster. The homeobox-containing *Hox* gene family,  
228 typically composed of 13 members in vertebrates (Hoegg and Meyer 2005), is among the best-  
229 studied examples of such an ancient gene cluster and is critical for the correct embryonic  
230 development (Pearson et al. 2005). The linear genomic arrangement of genes within the *Hox*  
231 cluster reflects their spatial expression along the anterior-posterior body axis (Pascual-Anaya  
232 et al. 2013), which establishes regional identity across this axis. The basal cephalochordate *B.*  
233 *floridae* has all 13 *hox* genes located in a single stereotypical cluster, along with an additional  
234 14<sup>th</sup> gene (Fig. 3B; (Takatori et al. 2008)), suggesting that the chordate ancestor also had an  
235 intact cluster. However in tunicates, this clustering appears to be lost. In *C. robusta*, the nine  
236 identified *Hox* genes are distributed across five scaffolds, with linkages preserved only  
237 between *Hox2*, *Hox3* and *Hox4*; *Hox5* and *Hox6*; *Hox12* and *Hox13* (Fig. 3; (Spagnuolo et al.  
238 2003; Wada et al. 2003)). In *O. dioica*, the total number of *Hox* genes is further reduced to  
239 eight, split between 6 scaffolds, including a duplication of *Hox9* (Fig. 3A; (Edwardsen et al.  
240 2005)). In *M. oculata* we could identify only six *Hox* genes, divided between 4 scaffolds, with  
241 clustering retained for the *Hox10*, *Hox11* and *Hox12* genes (Fig. 3). In Botryllidae genomes, the  
242 same seven *Hox* genes are conserved (Fig 3B), with a preserved linkage between *Hox10*,  
243 *Hox12* and *Hox13* in *B. leachii* and three copies of *Hox5* present in *B. schlosseri*. Altogether, the  
244 separation of the tunicate *Hox* cluster genes supports the hypothesis that reduction and  
245 separation of this ancient gene linkage occurred at the base of tunicate lineage (Edwardsen et  
246 al. 2005). In addition, *Hox9* appears to be specifically retained in neotenic Tunicates while  
247 there is no pattern of conserved *Hox* cluster genes specific to colonial ascidians.

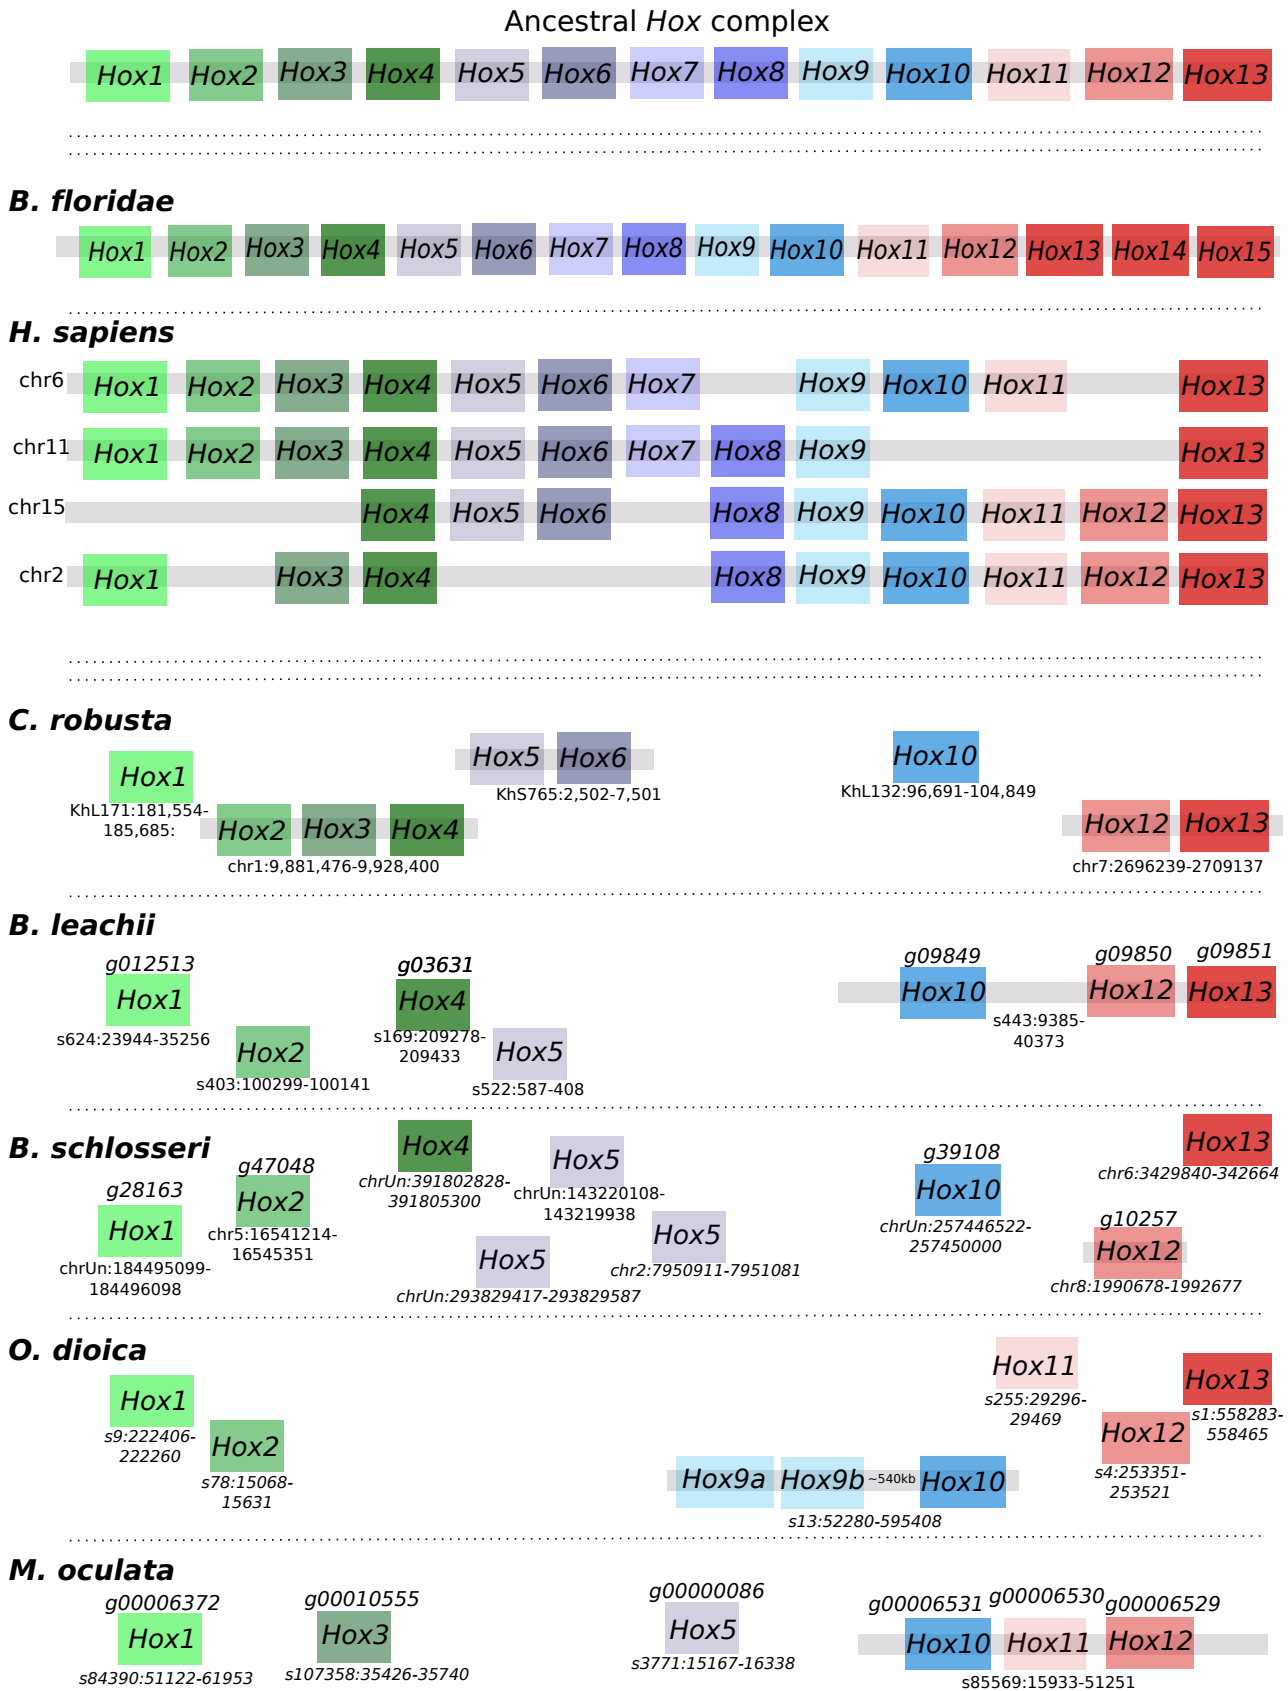

**Figure 3. *Hox* genes are dispersed and reduced in number within tunicate genomes.** Schematic depicting *Hox* gene linkages retained in five tunicate genomes in comparison to the ancestral *Hox* complex, which included thirteen genes. Orthologous genes are indicated by common colours. Chromosome or scaffold number is shown, along with gene ID when available for newly annotated genomes.

249 A second ancient homeobox-containing gene linkage is the *NK* cluster. This cluster, predicted  
250 to be present in the last common ancestor of bilaterians (Luke et al. 2003), consists of *Msx*,  
251 *Lbx*, *Tlx*, *NKx1*, *NKx3*, *NKx4* and *NKx5* (Fig. 4). In *B. floridae*, linkages between *Msx*, *NKx4* and  
252 *NKx3*; as well as between *Lbx* and *Tlx* provide evidence of retained ancestral clustering while  
253 *NKx5* was lost (Fig. 4; (Luke et al. 2003)). However in vertebrates, *NKx5* is still present, while  
254 only the gene linkages between *Lbx* and *Tlx* as well as between *Nkx4* and *Nkx3* remain (Fig. 4;  
255 (Garcia-Fernàndez 2005)). To further clarify the evolution of this ancestral cluster in  
256 tunicates, we determined the structure of the *NK* cluster within five ascidian genomes. In all  
257 these species, *NKx1* is absent and no evidence of clustering could be found with all identified  
258 orthologs located on different scaffolds (Fig. 4). In *C. robusta*, *M. oculata* and *O. dioica* only five  
259 members of this cluster remain, with the loss of either *Lbx* or *Tlx* as well as of *NKx3* and the  
260 duplication of the ortholog of *NKx4* (Fig. 4). By contrast, in the colonial tunicates *B. leachii* and  
261 *B. schlosseri*, *Tbx*, *Lbx* and *NKx3* are all present. In *B. schlosseri*, *Msx1* is absent and *NKx4*  
262 duplicated. In the *B. leachii* genome, *NK1* is the only ancestral cluster member to be missing  
263 and *Nk5* has been duplicated (Fig. 4). Altogether, these results suggest that there has been a  
264 loss of *NKx5* in Cephalochordate, one of *NKx1* in Tunicate and that the combination of *NKx3*,  
265 *Lbx* and *Tbx* may be specific to colonial ascidians.

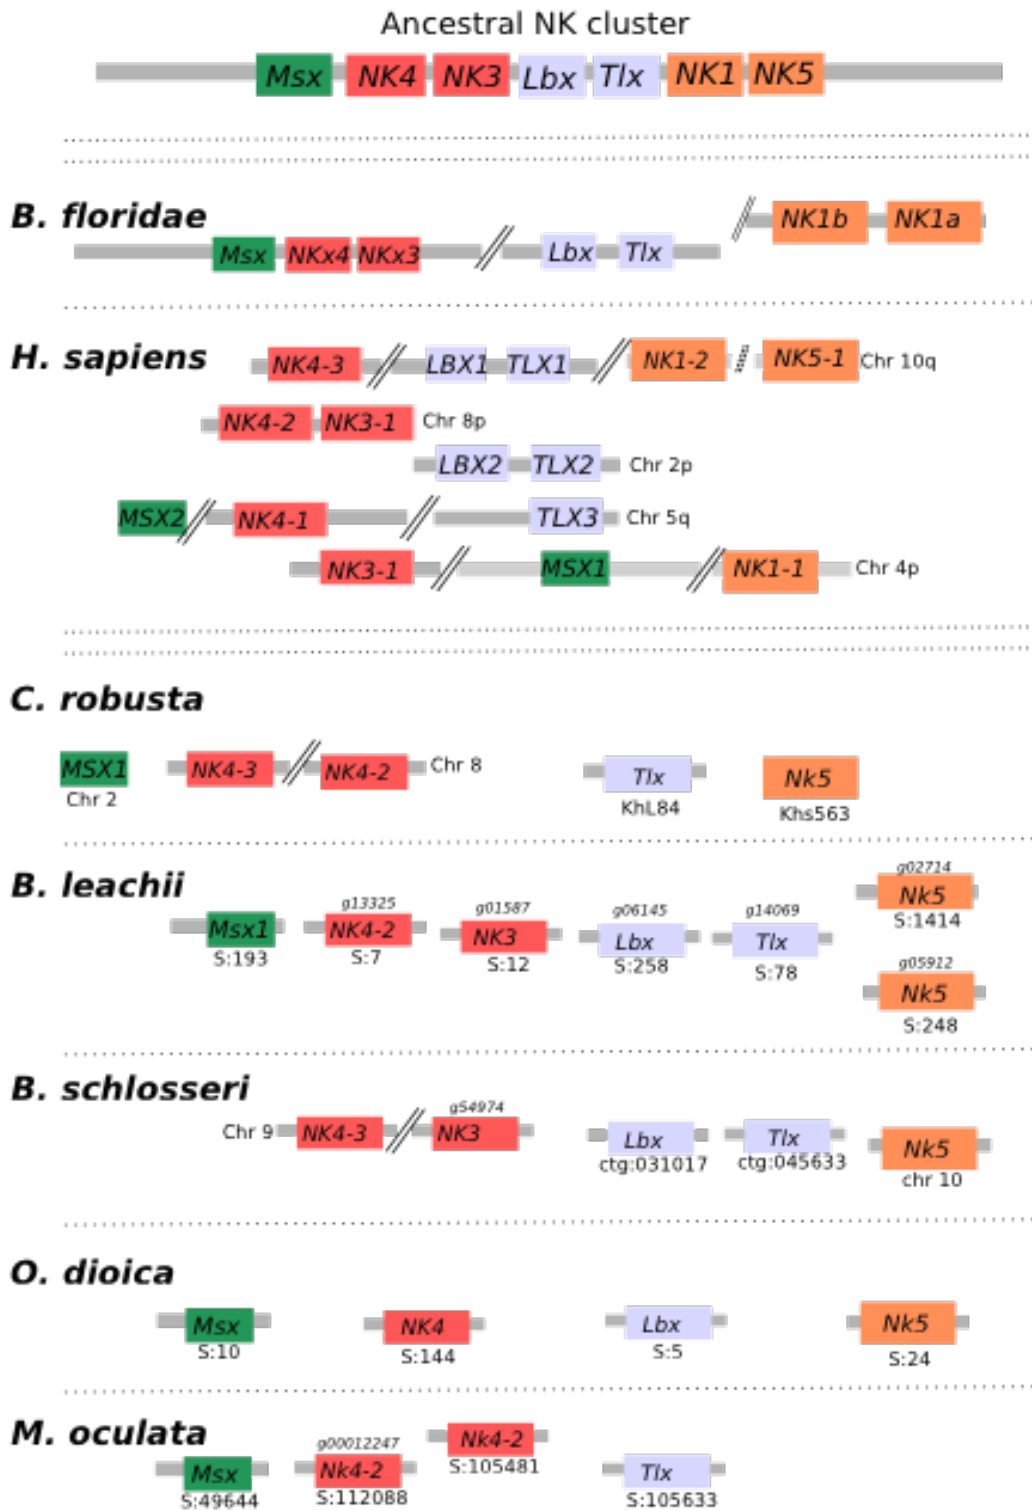

**Figure 4. NK homeobox cluster genes are fragmented within tunicate genomes.**

Schematic depicting the organization of the *NK homeobox* cluster genes among the studied chordate genomes. Double-parallel lines indicate > 1Mb distance between genes. Chromosome or scaffold number is shown, along with gene ID when available for newly annotated genomes. Orthologous genes are indicated by common colours.

267 A third ancient linkage that we investigated is the pharyngeal cluster, a gene group present in  
268 hemichordates, echinoderm and vertebrates genomes that is considered to be Deuterosome  
269 specific (Simakov et al. 2015). The cluster groups *foxhead domain protein (FoxA)*, *NKx2*  
270 (*NKx2.2 and Nkx2.1*), *Pax1/9*, *mitochondrial solute carrier family 25 member 21 (slc25A21)*,  
271 *mirror-image polydactyly 1 protein (mipol1)*, *egl nine homolog 3 (egln3)* and  
272 *dehydrogenase/reductase member 7 (dhrs7)*. Among these, *slc25a21*, *Pax1/9*, *mipol1* and *FoxA*  
273 pairs are also found in protostomes suggesting an even more ancient origin (Simakov et al.  
274 2015). The pharyngeal cluster is thought to have arisen due to the location of the regulatory  
275 elements of *Pax1/9* and *FoxA* within the introns of *slc25A21* and *mipol1* (Santagati et al. 2003;  
276 Wang et al. 2007), constraining the genes to remain in tight association with each other. In the  
277 *B. floridae* genome, the entire cluster is located on the same scaffold, with the exception of the  
278 *Nkx2.1* and *Nk2.2* gene pair located on separate scaffold. In *C. robusta*, only orthologs of *FoxA*,  
279 *slc25a29*, *Pax1* and *Pax9* could be identified. Nevertheless, all of them are located on the same  
280 chromosome (Fig. 5). In *O. dioica*, the cluster appears even further reduced. While orthologs of  
281 *FoxA*, *Pax1/9* and *Nkx2.2* genes were found on different scaffolds, only one rather distant  
282 linkage (> 1 Mb) between a *Pax-like* gene and *slc25A21* is retained. For both *B. schlosseri* and  
283 *M. oculata*, there was no evidence of clustering between genes (Fig. 5). In the *B. leachii*  
284 genome, *mipol1* is the sole missing gene from this cluster. However, only the pairing of a *Pax-*  
285 *like* and *slc25A21* genes remains (Fig. 5). Altogether, these results suggest that most of the  
286 Tunicates did not conserve the structure of this ancient linkage, but it is unknown what  
287 consequences this would have to their expression and function.



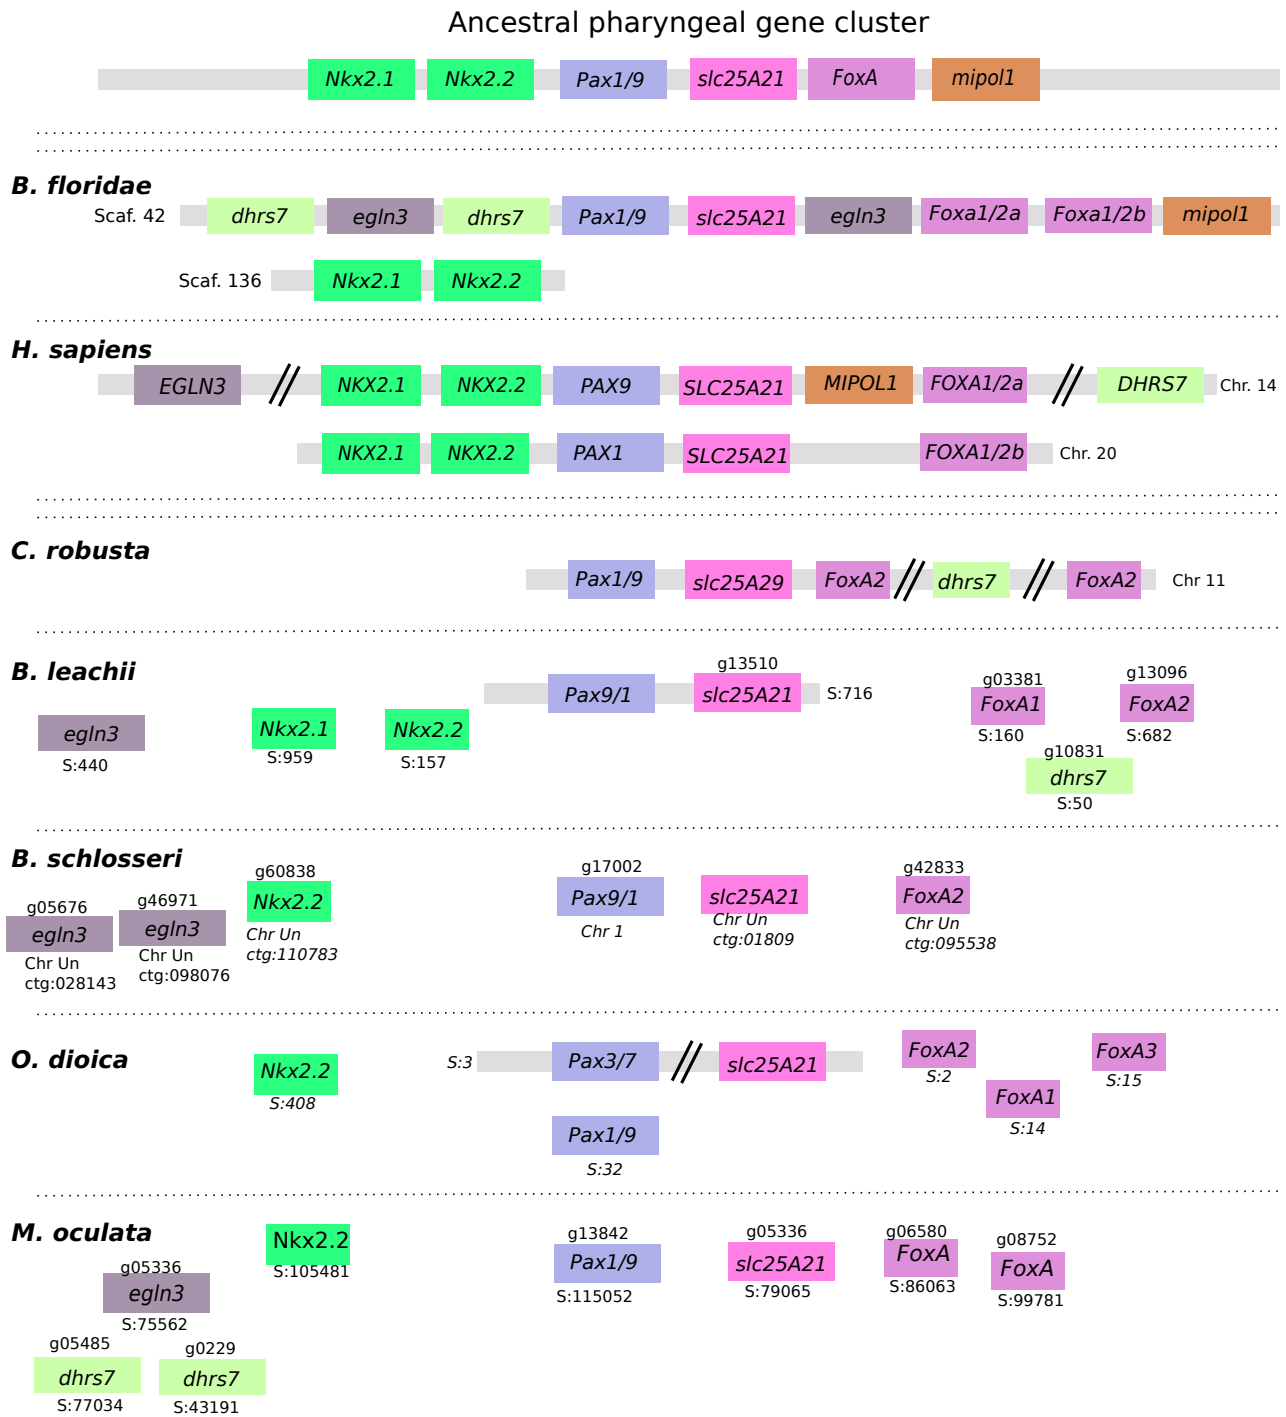

**Figure 5. Ancestral gene linkages remain between a few pharyngeal cluster genes in tunicate genomes.** Gene order of the six pharyngeal cluster genes, *NK2.1*, *NK2.2*, *Pax1/9* and *FoxA* in chordate genomes. Double-parallel lines indicate > 1 Mb distance between genes. Chromosome or scaffold number is shown, along with gene ID when available for newly annotated genomes. Orthologous genes are indicated by common colours.



290 ***Lineage-specific changes to cell-signalling pathways in Botryllidae genomes.***

291 To dissect more specifically the evolution of colonial ascidians, we examined the  
292 genomes of *B. leachii* and *B. schlosseri*, looking for key components of signalling pathways  
293 required for metazoan development and regeneration. Of particular interest, we focused on  
294 the Wingless-related integration site (Wnt), Notch and Retinoic acid (RA) signalling pathways.  
295 All three of these pathways have been implicated in WBR and asexual reproduction in colonial  
296 tunicates (Rinkevich et al. 2008, 2007b; Zondag et al. 2016).

297

298 **Wnt pathway**

299 Wnt ligands are secreted glycoproteins that have roles in axis patterning,  
300 morphogenesis and cell specification (Loh et al. 2016). The ancestral gene family appears to  
301 originate very early on during multi-cellular evolution and to be composed of eleven members  
302 (Kusserow et al. 2005; Guder et al. 2006). The *Wnt* gene family expanded to 19 members in  
303 the human genome, while independent gene loss has reduced this family to 7 genes in  
304 *Drosophila melanogaster* and *Caenorhabditis elegans* (Prud'homme et al. 2002). Consequently,  
305 we set out to investigate whether the *Wnt* gene family has either expanded or contracted  
306 during Tunicata speciation.

307 We found an increase in the number of *Wnt5a* genes among Styelidae genomes. In *B.*  
308 *schlosseri*, we identified 15 *Wnt* members, including seven *Wnt5a-like* genes on multiple  
309 scaffolds (Fig. 6, Table S2). In the *B. leachii* genome, fourteen *Wnt* ligand genes were  
310 identified, including four *Wnt5a* genes located on the same scaffold near *Wnt4* (Fig. 6). *M.*  
311 *oculata* has only 7 *Wnt* ligand genes, including three *Wnt5a-like* genes (Fig. 6, Table S2). In  
312 comparison, *C. robusta* has a total of 11 *Wnt* genes, including a single *Wnt5a* gene (Fig. 6,  
313 Table S2; (Wada et al. 2003)). In the compact *O. dioica* genome, this number has reduced to 6  
314 (*Wnts* 3, 4, 7, 11 and 16), none of which are *Wnt5a* orthologs (Table S2). Overall, this suggests

315 that an expansion through gene duplication of the *Wnt5* family occurred during tunicate  
 316 evolution, but was lost in some lineages.

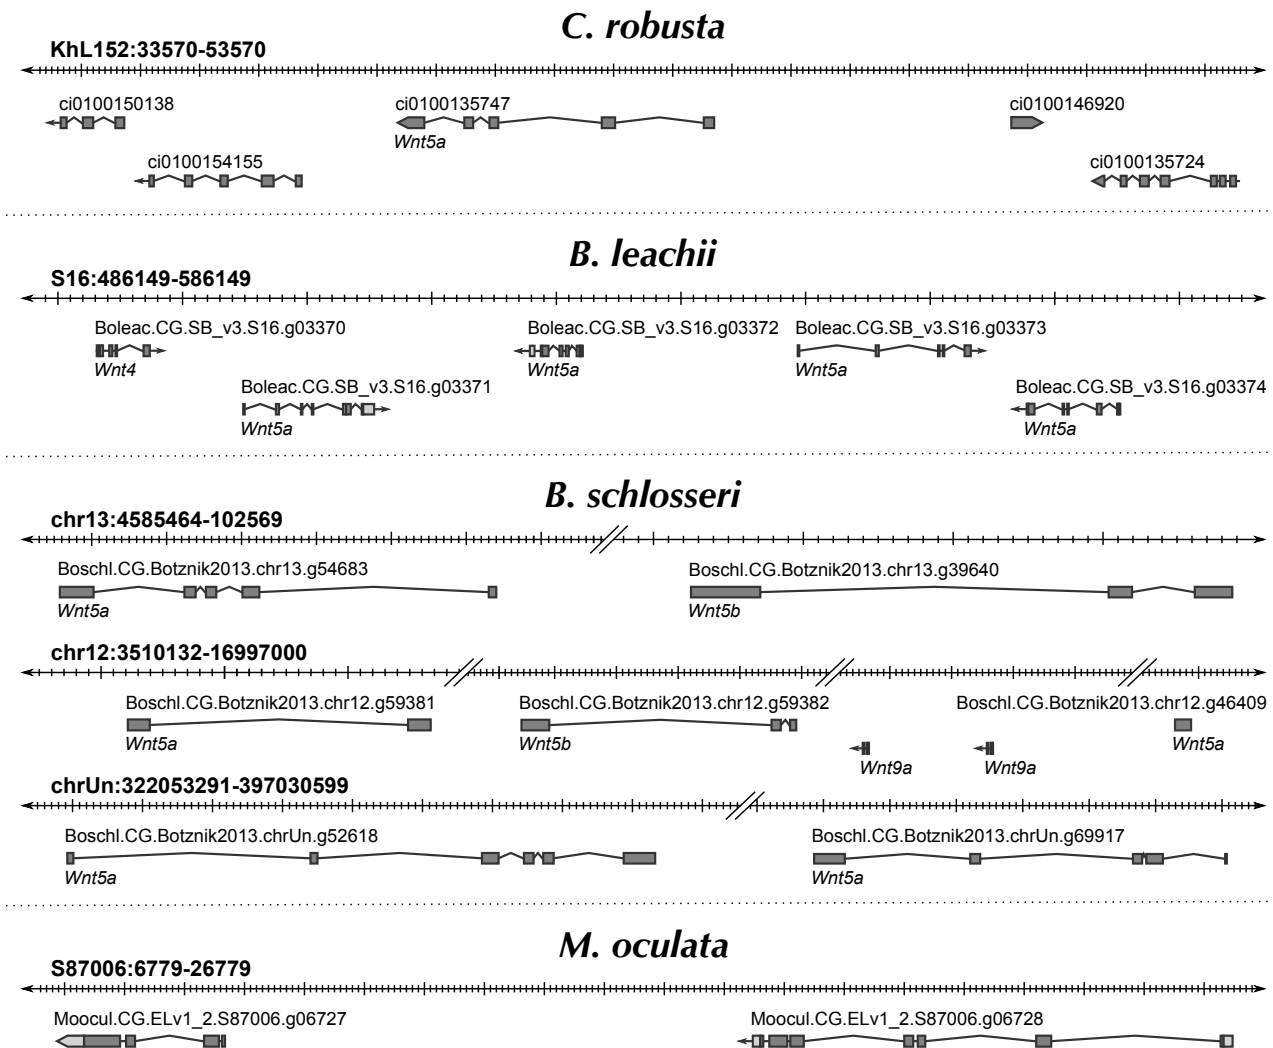

**Figure 6. Duplication of *Wnt5a* genes in tunicate genomes.**

Schematic showing the genomic location of *Wnt5*-like genes within each indicated genome. Note that no *Wnt5a* ortholog is present in the *O. dioica* genome. Double-parallel lines indicate > 1Mb distance between genes.

317

318 To assess the functionality of the Wnt pathway in Tunicates, we set out to assess  
 319 whether its downstream effectors are themselves present in the available genomic data. The  
 320 downstream pathways activated by Wnt ligands are divided into canonical, non-canonical  
 321 calcium and non-canonical planar cell polarity. The *Wnt5a* ligand is associated with both of

322 the non-canonical pathways through binding of membrane receptors that include *frizzled*  
323 (*Fzd4*), *receptor tyrosine kinase-like orphan receptor 1/2 (Ror1/2)* and *atypical tyrosine kinase*  
324 *receptor (Ryk)*. Further downstream, *disheveled (dsh)*,  $\beta$ -catenin (*Cnntb*), Axin, low-density  
325 lipoprotein receptor-related protein 5/6 (*LRP5/6*) and nuclear factor of activated T-cells  
326 (NFAT) are proteins essential for triggering intracellular responses to Wnt signalling  
327 (MacDonald et al. 2009). We identified orthologs for each of these signalling transduction  
328 molecules in all Tunicata genomes (Table S2), with no evidence of further gene duplication  
329 events. This supports the interpretation that signalling through the Wnt pathway is functional  
330 in tunicates.

331

### 332 **Notch pathway**

333 Notch receptors are transmembrane proteins that are involved in cell-cell signalling  
334 during development, morphogenesis and regeneration (Hamada et al. 2015). Following  
335 activation through the binding of the delta or jagged/serrate ligands, the intracellular domain  
336 of Notch is cleaved and induces the expression of downstream target genes including the *hes*  
337 (*hairy and enhancer of split*) gene family members (Guruharsha et al. 2012). The presence of  
338 both Notch and the Delta/Serrate/lag-2 (DSL) proteins in most metazoan genomes suggests  
339 that their last common ancestor had a single copy of each gene (Gazave et al. 2009). To  
340 establish how this pathway has evolved in tunicates, we screened these genomes for the  
341 Notch receptor using the conserved lin-Notch repeat (LNR) domain, and for genes encoding  
342 probable Notch ligands such as genes from the DSL family .

343 In all examined genomes, only a single *Notch* receptor gene was identified while the  
344 number of ligand genes varied (Table S3). The *C. robusta* genome contains two *DSL* genes,  
345 while *O. dioica*, *M. oculata* and *B. schlosseri* possess only a single *DSL*. By contrast, we found  
346 three *DSL* genes in *B. leachii* (Table S3). To determine the relationships between these

347 identified tunicate DSL-like genes, a phylogeny was constructed along with other chordate  
348 DSL proteins. All three *B. leachii* genes are Delta orthologs, two of them related to the *B.*  
349 *schlosseri* and *Cionidae* copy; the third one closer to the *M. oculata* and *H. roretzi* variant. The  
350 mouse, human and zebrafish delta and delta-like (DLL) proteins form a discrete clade loosely  
351 related to the genes found in Cephalochordates and Tunicates (Fig. 7, shaded box). Jagged  
352 proteins form a separate clade (Fig. 7). The tunicate DSL-like proteins present long  
353 phylogenetic branches, suggestive of greater diversity, which is also observed in the protein  
354 alignment (Fig. S3). This suggests that the tunicate DSL proteins are diverging rapidly from  
355 each other, indicative of lineage specific evolution of DSL-like genes.



356

### Figure 7. *B. leachii* Notch pathway

Bayesian phylogenetic tree depicting the relationship between tunicate and vertebrate DSL proteins, using *Drosophila* Delta to root the tree. Tunicate proteins are shown in bold and shaded areas correspond to Delta and Jagged groupings. Branch support values (probabilities) are indicated.

357

358

### 359 **Retinoic acid signalling**

360 Retinoic acid (RA) is an extracellular metabolite that is essential for chordate  
361 embryonic development. RA is synthesized from retinol (vitamin A) by two successive  
362 oxidation steps. In the first step, retinol dehydrogenase (RDH) transforms retinol into retinal.  
363 Then RA is produced by aldehyde dehydrogenase (ALDH), a superfamily of enzymes with  
364 essential roles in detoxification and metabolism (Jackson et al. 2011). RA influences the  
365 expression of downstream target genes by binding to the RA receptors, RAR and RXR (Fig. 8A  
366 (Cunningham and Duester 2015)). Finally, RA is metabolized by the cytochrome P450 family  
367 26 (Cyp26) enzyme, which absence of expression can restrict RA-induced responses to  
368 specific tissues or cell types (Ross and Zolfaghari 2011). Components of this pathway have  
369 been found in non-chordate animals, suggesting a more ancient origin (Canestro et al. 2006).  
370 This pathway has previously been shown to be required for *B. leachii* WBR and *Ciona*  
371 development, yet several genes required for RA signalling appear to be missing in *O. dioica*  
372 (Martí-Solans et al. 2016).

373 Rdh10 is the major dehydrogenase associated with the first steps of RA production,  
374 although the Rdh16 and RdhE2 enzymes can also substitute this function (Belyaeva et al.  
375 2009; Lee et al. 2009; Belyaeva et al. 2015). The *O. dioica* genome has no orthologs for either  
376 *Rdh10* or *Rdh16* but it does have four genes that encode for RdhE2 proteins (Martí-Solans et  
377 al. 2016). *O. dioica* also lacks both an *Aldh1*-type gene as well as a *Cyp26* gene but has a single  
378 RXR-ortholog (Table S4, (Martí-Solans et al. 2016)). In contrast, the *C. robusta* genome,  
379 contains single copies of *Rdh10*, *Rdh16* and *RdhE2* genes and a total of four *Aldh1* genes,  
380 located on two chromosomes (Canestro et al. 2006). Consistent with *C. robusta*, *M. oculata*, *B.*

381 *leachii* and *B. schlosseri* genomes all have single copies of *Rdh10*, *Rdh16* and *RdhE2* genes, as  
382 well as three *Aldh1a/b* genes on separate scaffolds (Table S4).

383 Three retinoic acid receptor genes were identified within the *B. leachii* genome, one of  
384 which had been cloned previously (*g03013*, (Rinkevich et al. 2007b) All three were also found  
385 in *C. robusta*, *M. oculata* and *B. schlosseri* genomes (Table S4). While there is only one potential  
386 *Cyp26* gene in *M. oculata*, four paralogs were identified in *B. leachii* and *B. schlosseri*. A  
387 phylogenetic analysis showed that these 4 genes group with CYP26 proteins (Fig. 8B, Table  
388 S4). Altogether, these results show a loss of key RA-pathway genes in *O. dioica* (*Rdh10*, *Rdh16*,  
389 *Cyp26* and *Aldh1a*), while copy numbers in other tunicate genomes increase.

390

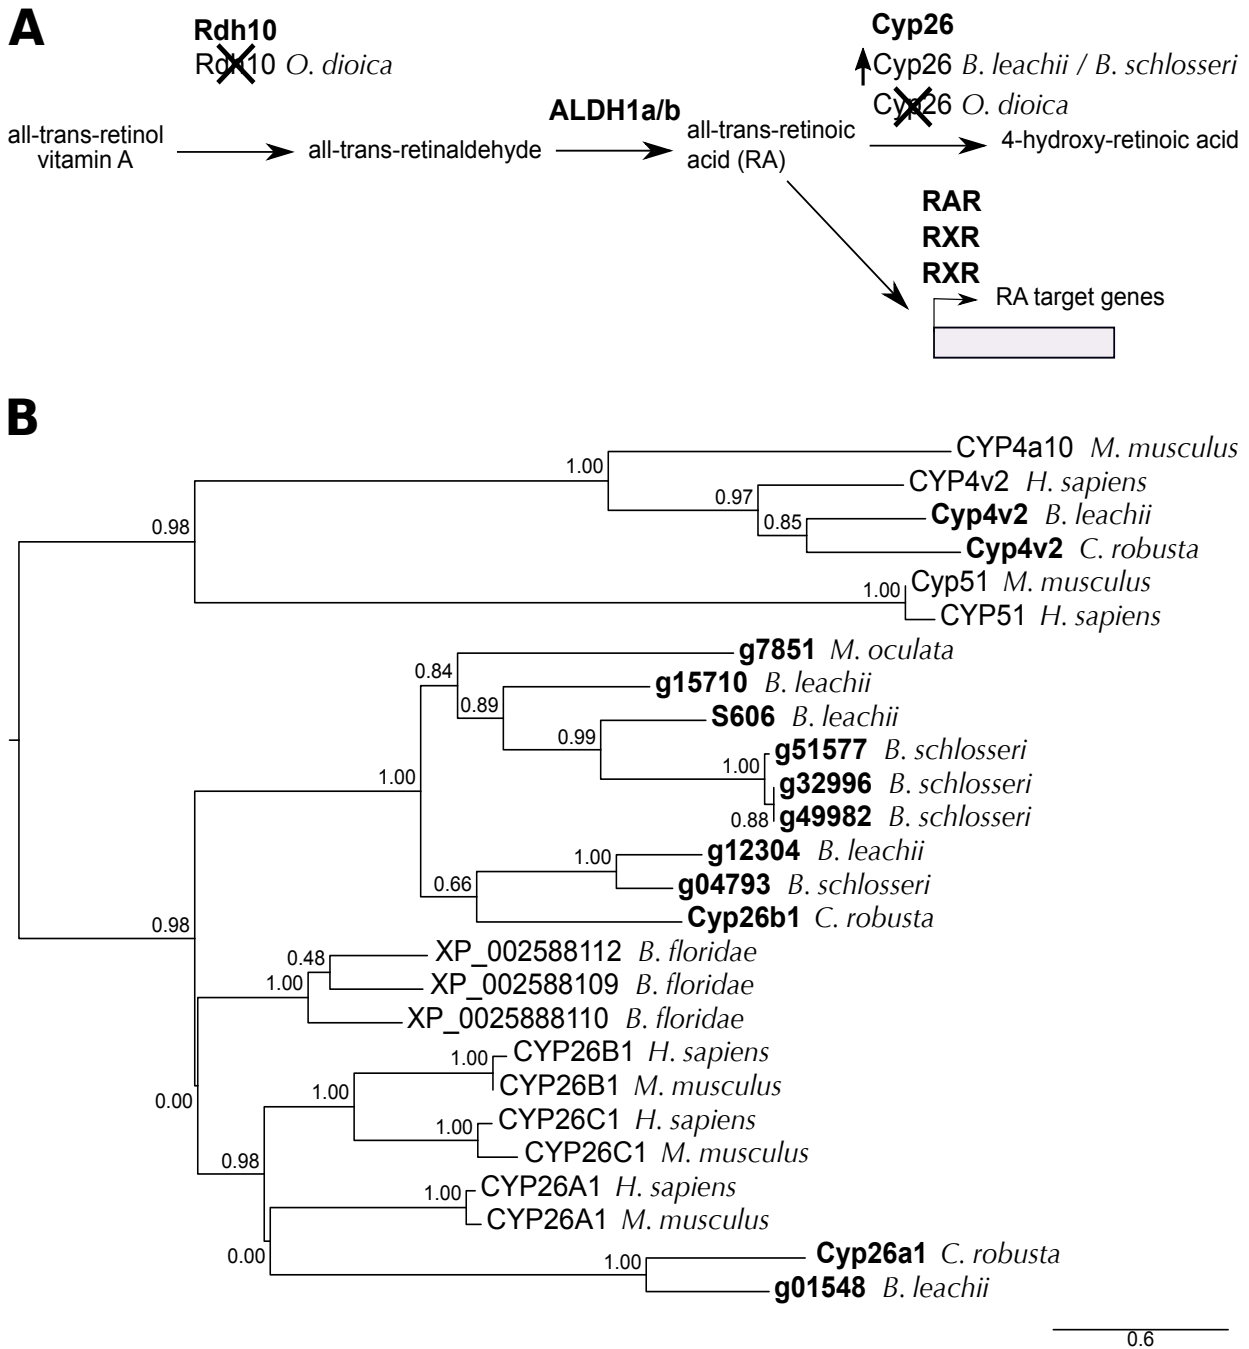

### Figure 8. Evolution of the RA pathway in tunicates

**(A)** Overview of the RA synthesis and degradation pathway. In bold are the major proteins that contribute to RA signalling during animal development. Indicated below these are changes to the number of copies present in examined genomes. **(B)** ML phylogenetic tree depicting the relationship between invertebrate and vertebrate CYP26 proteins using CYP4 and CYP51 proteins as an out-group. Tunicate proteins are shown in bold. No *Cyp26* gene has been identified in the *O. dioica* genome. Values for the approximate likelihood-ratio test (aLRT) are indicated.

## 392 **Discussion**

393

### 394 **Genomic diversity within the Stolidobranchia**

395         The *B. leachii* genome, along with previous genomic analyses of other ascidian species,  
396 support the widely held view that ascidian genomes are diverse and rapidly evolving, which is  
397 particularly evident in the Stolidobranchia group (Seo et al. 2001; Dehal et al. 2002b;  
398 Voskoboynik et al. 2013a; Stolfi et al. 2014; Tsagkogeorga et al. 2010; Bock et al. 2012;  
399 Tsagkogeorga et al. 2012; Rubinstein et al. 2013; Griggio et al. 2014). Nevertheless, botryllids  
400 are sufficiently similar in external appearance and morphology for early researchers to have  
401 suggested that *Botrylloides* could be a subgenus of *Botryllus* (Saito et al. 2001; Nydam et al.  
402 2017). Strikingly however, the *B. schlosseri* genome differs from that of *B. leachii*, as well as  
403 from other sequenced tunicate genomes (Table 2). Particularly striking is the comparison  
404 between the *B. leachii* and *B. schlosseri*, where differences in genome sizes (194 Mb vs 725  
405 Mb), the fraction of repetitive sequences (18 % vs 60 %; 65 % in (Voskoboynik et al. 2013a))  
406 and the predicted gene number (15,839 vs 27,463; (Voskoboynik et al. 2013a)) suggest  
407 divergent genome architectures. Altogether, these comparisons indicate that the *B. schlosseri*  
408 genome has undergone a significant increase in its genomic content, including  
409 retrotransposon expansion (Table S1). In particular, there are at least two additional families  
410 in the *B. schlosseri* hAT transposon superfamily and counts of common hAT elements, such as  
411 hAT-Charlie, can differ dramatically (e.g. hAT-Charlie 366 in *B. leachii* vs 46,661 in *B.*  
412 *schlosseri*). DNA methylation is a key suppressor of transposon activity, changes to the  
413 methylation of transposable elements is a known driver of increased transposition (O'Neill et  
414 al. 1998; Maumus and Quesneville 2014; Simmen et al. 1999; Suzuki et al. 2007). DNA  
415 methylation in tunicate species has only been studied in *C. robusta*, and is described as mosaic,  
416 gene body methylation, whereas non-coding regions including transposons remain



417 unmethylated (Suzuki et al. 2007), it is unknown how retrotransposons are suppressed in  
418 tunicate genomes. Nevertheless, the observed increase in transpositions could be a  
419 consequence of low non-coding DNA methylation, which may contribute to the rapid genome  
420 evolution observed in tunicate species, even between closely related species such as *B.*  
421 *schlosseri* and *B. leachii*.

422 Rapid genome evolution, and active transposable elements in particular, are proposed  
423 to aid adaptation to new environments for invasive species (Stapley et al. 2015). Differences  
424 in the colonization ability of tunicates has been noted, not only between related species such  
425 as *B. leachii* and *B. schlosseri* (Brunetti 1976; Brunetti et al. 1980; Brunetti 1974), but even at  
426 the molecular level within *B. schlosseri* populations (Bock et al. 2012; Nydam et al. 2017). It is  
427 thus possible that the observed success in tunicate invasion (Zhan et al. 2015) is supported by  
428 their plasticity in genome characteristics like transposon diversity and gene number.

429 Ancient homeobox gene clusters whose structure has been retained over millions of  
430 years of evolution in many organisms are fragmented in tunicate genomes. Because, the  
431 expression of each *Hox* gene across the anterior-posterior axis relates to their location within  
432 the *Hox* gene cluster (Pascual-Anaya et al. 2013), cluster breaks are predicted to have  
433 consequences for patterning processes. However, an adult body plan with correct spatial  
434 orientation of its body axes during tissue development in ascidians also needs to be  
435 established during sexual, asexual and WBR. Early patterning events in tunicate species have  
436 only been characterized during sexual reproduction in *Ciona*. Early stages of development  
437 (prior to gastrulation) follow a mosaic pattern of developmental axis formation, where  
438 inheritance of maternally provided factors establishes the body axes (Nishida 2005). *Hox* gene  
439 knockdown experiments in *C. robusta* revealed that they have very limited roles, with defects  
440 only observed in larval neuronal and tail development upon loss of *Ci-Hox11* and *Ci-Hox12*  
441 function (Ikuta et al. 2010). It thus appears that patterning events in *C. robusta* are less

442 dependent upon anterior-posterior spatial expression of *Hox* genes to establish regional  
443 identity. Previously in *B. schlosseri*, the entry point of the connective test vessel into the  
444 developing bud determines the posterior end of the new zooid (Sabbadin et al. 1975).  
445 Therefore it is possible that ascidians incorporate environmental and physical cues to  
446 compensate for the lost gene cluster during polarity establishment. A wider analysis  
447 comprising multiple tunicate species will be necessary to investigate the exact consequences  
448 of homeobox cluster dispersion and whether the compensatory mechanism observed in *C.*  
449 *robusta* is the norm or an exception.

450

### 451 **Gene orthology analysis and coloniality candidate pathways**

452 Among the tunicate orthologous clusters that we obtained, we identified several  
453 groups of genes that are not shared by all the tunicate genomes (Fig. 2A). Given the rapid  
454 genomic evolution of these organisms, it is more likely that these genes have either been lost  
455 or that their sequence has highly diverged, rather than independent gains of novel genes.

456 Of particular interest are the genes found only in the *B. schlosseri* and *B. leachii*  
457 genomes, as these may function in biological processes unique to colonial tunicates. Many of  
458 these genes have orthologs not only in vertebrates, but also in more evolutionarily distant  
459 animals such as *C. elegans* (File S4). This suggests that these genes have a more ancient origin,  
460 which was retained specifically in Botryllidae genomes. The overrepresented genes (File S4)  
461 have annotated functions including circulation (GO:0003018, GO:0003013, GO:0050880),  
462 wound healing (GO:0072378) and cell communication (GO:0007154); as well as regulation of  
463 immune cell differentiation (GO:0033081, GO:0033089), immune system process  
464 (GO:0002376) and interferons (GO:0032608). Unlike solitary tunicate species, colonial  
465 ascidians possess a complex system of single cell-lined vessels used to transport haemocytes  
466 and facilitate communication between zooids within the colony (Mukai et al. 1978). In

467 addition, immune response is known to have roles in wound healing, vasculogenesis,  
468 allorecognition and regeneration (Voskoboinik et al. 2013b; Taketa et al. 2015; Gutierrez and  
469 Brown 2017; Sattler 2017). Therefore, it is possible that these genes, found only in *Botryllus*  
470 and *Botrylloides*, contribute to biological pathways and cellular processes that have important  
471 roles in colonialism.

472 Both *O. dioica* and *B. schlosseri* had a high number (2160 and 2716 respectively) of  
473 clusters unique to their genomes (Fig. 2A). While the *O. dioica* genome has undergone  
474 considerable loss of ancestral genes (Albalat and Cañestro 2016; Seo et al. 2001), the total  
475 number of genes in this specie is similar to that of other tunicates (Table 2). Taken together,  
476 these observations suggest that there has been a duplication of the retained genes such as *Otx*  
477 (3 copies in *O. dioica*, one in *Ciona*(Cañestro et al. 2005)), potentially involving roles in their  
478 peculiar neotenic and dioecious life cycle. The *B. schlosseri* genome has an ~10,000 higher  
479 predicted gene number compared to other tunicates (Table 2). Such massive increase in  
480 numbers suggests partial genome duplication. Further analysis will be required to determine  
481 whether these are novel or duplicated genes, hence providing important insights in the  
482 evolution of Tunicata genomes.

483

#### 484 **Lineage-specific changes to evolutionarily conserved cell communication pathways**

485 Cell signalling pathways are critical for morphogenesis, development and adult  
486 physiology. In particular, we have focused our analysis on three highly conserved pathways:  
487 Wnt, Notch and Retinoic Acid signalling. Representatives of all twelve *Wnt* gene subfamilies  
488 are found in metazoans, suggesting that they evolved before evolution of the bilaterians  
489 (Janssen et al. 2010). We identified members of each *Wnt* subfamily in tunicate genomes,  
490 along with numerous examples of lineage-specific gene loss and/or duplication. The most  
491 striking of these events was an increase in *Wnt5a* gene copy number in *B. leachii*, *B. schlosseri*

492 and *M. oculata* genomes. Indeed, most invertebrates genomes, including the basal chordate *B.*  
493 *floridae*, contain a single *Wnt5* gene while most vertebrate genomes have two *Wnt5a* paralogs,  
494 believed to be a result of whole genome duplication (Martin et al. 2012). However, in the  
495 analysed tunicate genomes, up to 15 copies of this gene were identified, potentially these  
496 additional genes may have been co-opted into novel roles and were retained during tunicate  
497 evolution. *Wnt5a* ligands have numerous biological roles, including a suppressive one during  
498 zebrafish regeneration (Stoick-Cooper et al. 2007) and a promotive one during amphioxus  
499 regeneration (Somorjai et al. 2012). Furthermore, components of both Wnt signalling  
500 pathways are differentially expressed during WBR (Zondag et al. 2016). It is thus conceivable  
501 that *Wnt5a* gene number has expanded in colonial tunicates to sustain WBR. A functional  
502 characterization of the role of these numerous copies of *Wnt5a* would thus be highly  
503 interesting and potentially reveal evolutionary insights into chordate regeneration.

504 All components of the Notch pathway are present in the genomes we investigated. Of  
505 particular interest, the DSL Notch ligand appears to be rapidly evolving in the tunicates. This  
506 indicates that tunicate DSL proteins are under less pressure, than vertebrate orthologous  
507 proteins, to conserve their sequences. Given that the interaction between the DSL domain and  
508 the Notch receptor is core to signaling pathway activation (Chillakuri et al. 2012), it will be  
509 interesting to assess whether the functional ligand-receptor interactions between tunicate  
510 DSL proteins and tunicate Notch proteins have adapted accordingly.

511 Components of the RA signalling pathway have also been identified in all the tunicate  
512 genomes. However, *Oikopleura* has seemingly lost a functional RA synthesis pathway, while  
513 still forming a functional body plan. This suggests that either uniquely RA is not involved in  
514 critical developmental events in this species, that the RA signalling function has been replaced  
515 or that *O. dioica* utilizes an alternative synthesis approach. Conversely, lineage specific

516 increases in RA pathway gene numbers have been observed in *C. robusta* (Aldh1, (Sobreira et  
517 al. 2011)) and *Botrylloides* (CYP26 genes, Fig. 8).

518 RA, Notch and Wnt pathways play roles in regeneration and development in many  
519 species, including Stolidobranchian tunicates (Rinkevich et al. 2007b, 2008; Zondag et al.  
520 2016) and *Cionidae* (Hamada et al. 2015; Jeffery 2015). The observed loss of RA signalling  
521 genes may result in reduced regeneration ability for *O. dioica*, however it's regenerative  
522 abilities have not been characterized. Given the unique chordate WBR potential developed by  
523 colonial tunicates, it is conceivable that there is selective pressure on their genomes to retain  
524 these pathways. We thus predict that these pathways play a similar role in colony reactivation  
525 following hibernation.

526 Among tunicates there exist significant differences in life cycle, reproduction and  
527 regeneration ability, even between closely related species of the same family, which likely  
528 reflect an underlying diversity in genomic content. For instance, differences in both asexual  
529 and sexual reproduction have been observed within the Botryllidae family (Oka and  
530 Watanabe 1957; Brunetti 1974, 1976, Berrill 1951, 1947, 1941). Furthermore, *B. schlosseri*  
531 can only undergo WBR during a short time frame of their asexual reproductive cycle when the  
532 adults are reabsorbed by the colony (Voskoboynik et al. 2007; Kürn et al. 2011) while *B.*  
533 *leachii* can undergo WBR throughout their adult life (Rinkevich et al. 2007b). Overall, this  
534 indicates that despite a generally similar appearance, the rapid evolution of the Tunicata  
535 subphylum has provided diversity and innovations within its species. It will be interesting to  
536 investigate how such genomic plasticity balances between adaptation to new challenges and  
537 constraint, preserving common morphological features, in future studies.

538 In conclusion, our assembly of the *B. leachii* genome provides an essential resource for  
539 the study of this colonial ascidian as well as a crucial point of comparison to gain further  
540 insights into the remarkable genetic diversity among tunicate species. In addition, the genome

541 of *B. leachii* will be most useful for dissecting WBR in chordates; particularly through  
542 comparison with *B. schlosseri* for understanding how the initiation of WBR can be blocked  
543 during specific periods of their life cycle. Furthermore, given the key phylogenetic position of  
544 Tunicates with respect to vertebrates, the analysis of their genomes will provide important  
545 insights in the emergence of chordate traits and the origin of vertebrates.

## 546 **Methods**

547

### 548 **Sampling, library preparation and sequencing**

549 *B. leachii* colonies were collected from Nelson harbour (latitude 41.26°S, longitude  
550 173.28°E) in New Zealand. To reduce the likelihood of contamination, embryos were  
551 dissected out of a colony and pooled before carrying out DNA extraction using E.Z.N.A SP Plant  
552 DNA Mini Kit. A total of 2 µg each was sent to New Zealand Genomics Limited (NZGL) for  
553 library preparation and sequencing. Short read sequencing of Illumina TruSeq libraries in a  
554 HiSeq2500 generated 19,090,212 paired-end reads of 100 bp (average fragment size: 450 bp,  
555 adaptor length: 120 bp). A second sequencing (Illumina Nextera MiSeq Mate Pair) not size-  
556 selected generated 31,780,788 paired-end sequences of 250 bp (fragment size: 1.5 - 15 kb,  
557 median size: ~3 kb, adaptor length: 38 bp).

558 PreQC report was generated using the String Graph Assembler software package  
559 (Simpson 2014) and quality metrics before assembly with both FastQC (Andrews 2010) as  
560 well as MultiQC (Ewels et al. 2016) (Fig. S1). These analyses revealed that 91 % of sequences  
561 had a mean Phred quality score  $\geq 30$ , 96 % of bases a mean Phred quality score  $\geq 30$ , and  
562 39 % of sequences an adapter sequence (either Illumina or Nextera). Adaptor trimming was  
563 performed with NxTrim (O'Connell et al. 2015) for the mate pair library, followed by  
564 Trimmomatic (Bolger et al. 2014) with the following options: MINLEN:40  
565 ILLUMINACLIP:2:30:12:1:true LEADING:3 TRAILING:3 MAXINFO:40:0.4 MINLEN:40 for both  
566 libraries. After trimming, 86,644,308 paired-end (85 %) and 12,112,004 (12 %) single-end  
567 sequences remained (100 % with a mean Phred quality score  $\geq 30$ , < 1 % with an adapter  
568 sequence).

569

### 570 **Genome assembly**

571 *De novo* assembly was performed in three consecutive iterations following a Meta-  
572 assembly approach (Table S5). First, both libraries were assembled together in parallel, using  
573 a k-mer size of 63 following the results from KmerGenie (Chikhi and Medvedev 2014)  
574 whenever available, by five assemblers: AbySS (Simpson et al. 2009), Velvet (Zerbino and  
575 Birney 2008), SOAPdenovo2 (Luo et al. 2012), ALLPATHS-LG (Gnerre et al. 2011), MaSuRCA  
576 (Zimin et al. 2013). The MaSuRCA assembler was run twice, once running the adapter filtering  
577 function (here termed “MaSuRCA-filtered”), the other without (termed simply “MaSuRCA”).  
578 Their respective quality was then estimated using three different metrics: the N50 length, the  
579 BUSCO core-genes completion (Simão et al. 2015) and the Glimmer number of predicted  
580 genes (Delcher et al. 1999). Second, these drafts were combined by following each ranking  
581 using Metassembler (Wences and Schatz 2015), hence producing three new assemblies  
582 (limiting the maximum insert size at 15 kb). Third, the *B. leachii* transcriptome (Zondag et al.  
583 2016) was aligned to each meta-assembly using STAR (Dobin et al. 2013), which were then  
584 combined thrice more using Metassembler following their alignment percentage and limiting  
585 the maximum insert size at 3 kb, 8 kb and 15 kb. Finally, the quality of the meta-meta-  
586 assemblies was estimated using the BUSCO score and the best one (Table S5) selected as the  
587 reference *de novo* assembly.

588

#### 589 **Data access**

590 All data was retrieved from the indicated sources in January 2016. Note that *Ciona*  
591 *intestinalis* type A (Dehal et al. 2002b) has recently been recognized as a distinct species  
592 (*Ciona robusta*, (Brunetti et al. 2015)) and that this study has been undertaken before it was  
593 renamed.

594 *B. leachii*, *B. schlosseri*, *C. robusta*, *M. oculata*: Ascidian Network for *In Situ* Expression and  
595 Embryonic Data (ANISEED, <https://www.aniseed.cnrs.fr/aniseed/>, (Tassy et al. 2010)).



596 *O. dioica*: Oikopleura Genome Browser

597 (<http://www.genoscope.cns.fr/externe/GenomeBrowser/Oikopleura/>, (Seo et al. 2001)).

598 *B. floridae*, *H. sapiens*: Joint Genome Institute (JGI, <http://genome.jgi.doe.gov>, (Grigoriev et al.  
599 2012))

600

### 601 **Repeat region analysis**

602 *A de novo* repeat library was build for each tunicate genome using RepeatModeler  
603 (Smit and Hubley 2015). This utilizes the RECON tandem repeats finder from the RepeatScout  
604 packages to identify species-specific repeats in a genome assembly. RepeatMasker (Smit et al.  
605 2015) was then used to mask those repeats.

606

### 607 **Gene annotation**

608 *Ab initio* genome annotation was performed using MAKER2 (Holt and Yandell 2011)  
609 with Augustus (Stanke and Waack 2003) and SNAP (Korf 2004) for gene prediction. In  
610 addition, we used our previously published transcriptome (Zondag et al. 2016) and a  
611 concatenation of UniProtKB (UniProt Consortium 2015), *C. robusta* and *B. schlosseri* proteins  
612 into a custom proteome as evidence of gene product. Using the predicted genes, Augustus and  
613 SNAP were then trained to the specificity of *B. leachii* genome. A second round of predictions  
614 was then performed, followed by a second round of training. The final annotation of the  
615 genome was obtained after running a third round of predictions, and the provided trained  
616 Augustus and SNAP configurations after a third round of training. Non-coding RNA sequences  
617 were then annotated using Infernal (Nawrocki and Eddy 2013) with Rfam library 12.0  
618 (Nawrocki et al. 2015), tRNAscan-SE (Lowe and Eddy 1997) and snoRNA (Lowe 1999).  
619 Finally, the identified sequences were characterized by InterProScan (Jones et al. 2014).

620

## 621 **Analysis of Gene Ontology terms**

622           Distribution of Gene Ontology (GO) terms were computed for each species as follows.  
623 GO terms were extracted from the genome annotation and the number of occurrence for each  
624 term determined using a custom Python script. The resulting list of frequencies was then  
625 simplified using REVIGO (similarity factor “small” of 0.5, (Supek et al. 2011)) and the  
626 TreeMap output retrieved. The hierarchy of every GO term present was reconstructed  
627 following the schema defined by the core gene ontology (go.obo, (The Gene Ontology  
628 Consortium 2015)) using a custom Python script selecting the shortest path to the root of the  
629 tree, favouring smaller GO terms identification number in case of multiple paths. Finally,  
630 frequencies were displayed using the sunburstR function of the Data-Driven Documents  
631 library (D3, (Bostock et al. 2011)).

632           Predicted amino-acid sequences for all species were retrieved and clustered into  
633 17,710 groups by OrthoMCL (Li et al. 2003). Protein sequences within each group were then  
634 aligned into a Multiple Sequence Alignment (MSA) by Clustal-Omega, and the corresponding  
635 consensus sequence inferred by EMBOSS cons. Consensus sequences were matched to the  
636 Swiss-Prot curated database using BLASTp (e-value cut-off of  $10^{-5}$ ), and the GO terms  
637 corresponding to the best match retrieved. GO terms frequencies were analysed as described  
638 above and displayed using REVIGO’s treemap. The overrepresentation analysis was  
639 performed using GOrilla (Eden et al. 2009) with *Homo sapiens* as the organism background,  
640 using a *p*-value threshold of  $10^{-3}$  and REVIGO treemap (similarity factor “medium” of 0.7) for  
641 visualization.

642

## 643 **Analysis of specific gene families**

644           Genes and transcripts for each examined genome were identified by a tBLASTn search  
645 with an e-value cut-off at  $10^{-5}$  using the SequencerServer software (Priyam et al. 2015). This

646 was followed by a reciprocal BLAST using SmartBLAST (NCBI Resource Coordinators 2016),  
647 to confirm their identity.

648 Delta serrate ligand conserved protein domain (PF01414) was used to identify the  
649 corresponding proteins in tunicate genomes. To identify *Notch* receptor genes the conserved  
650 LNR (lin-notch repeat) domain (PF00066) was used. ALDH-like genes were identified by  
651 tBLASTn search (PF00171) and classified using SMART blast.

652

### 653 **Phylogenetics**

654 Sequences were aligned with ClustalX (Jeanmougin et al. 1998) before using ProtTest 3  
655 (Abascal et al. 2005) to determine the best-fit model of evolution. The best-fit model for the  
656 DSL phylogeny was WAG+I+G and, for CYP26 proteins, was LG+I+G.

657 Bayesian inference (BI) phylogenies were constructed using MrBayes (Ronquist and  
658 Huelsenbeck 2003) with a mixed model for 100,000 generations and summarized using a  
659 Sump burn-in of 200. Maximum Likelihood (ML) phylogenies were generated by PhyML  
660 (Guindon et al. 2010), using the estimated amino acid frequencies.

661 Accession numbers are provided in File S3 and sequence alignments are provided in  
662 Figure S3. Analyses carried out with BI and ML produced identical tree topologies.  
663 Trees were displayed using FigTree v1.4.2 (Rambaut 2016).

## 664 Acknowledgements

665 Funding support was provided to M.J.W. by the Otago BMS Deans Bequest and  
666 Department of Anatomy. S.B. was supported by the Swiss National Science Foundation (SNSF)  
667 grant number P2ELP3\_158873. We would like to thank Peter Maxwell and the New Zealand  
668 eScience Infrastructure (NeSI); Christelle Dantec and ANISEED for help and advice during the  
669 annotation process, as well as for the accompanying *B. leachii* genome browser.

670

## 671 Supplementary Figures

672

673 **Fig. S1.** SGA analysis. Including genome size estimation and de Bruijn graph quantification.

674

675 **Fig. S2.** Gene Ontology terms identified in the larger orthologs clusters between the tunicate  
676 genomes.

677

678 **Fig. S3.** Protein sequence alignments used to generate the Notch and RA phylogenies.

679

680

## 681 Supplementary Files

682

683 **File S1.** BUSCO scores for the *B. leachii* genome assembly

684

685 **File S2.** Results of Repeatmasker analysis using de novo repeat libraries (Repeatmodeler)

686

687 **File S3.** Results from OrthoMCL group including the REVIGO GO term listed each orthologue  
688 group, used in the comparison of the GO terms between the tunicate genomes.

689

690 **File S4.** BLASTp, GOrillia and REVIGO results used used for overrepresentation analysis of GO  
691 terms present in the *B. leachii* and *B. schlosseri* only orthologue group analysis.

692

693 **File S5.** Corresponding Gene and Transcript IDs for *B. leachii* genes of interest. Accession  
694 numbers for protein sequences used in phylogeny construction.

695

## 696 Supplementary Tables

697

698 **Table S1.** Repetitive elements identified in the *B. leachii* and *B. schlosseri* genomes using  
699 Repeatmoduler and RepeatMasker.

700

701 **Table S2.** Comparison of the number of Wnt pathway genes.

702

703 **Table S3.** Comparison of the number of Notch pathway genes.

704

705 **Table S4.** RA pathway components across annotated tunicate genomes.

706

707 **Table S5.** Iterative results of the meta-assembly approach followed for the *de novo* assembly  
708 of the *B. leachii* genome

709

## 710 References

- 711 Abascal F, Zardoya R, Posada D. 2005. ProtTest: selection of best-fit models of protein evolution.  
712 *Bioinformatics* **21**: 2104–2105. [https://academic.oup.com/bioinformatics/article-](https://academic.oup.com/bioinformatics/article-lookup/doi/10.1093/bioinformatics/bti263)  
713 [lookup/doi/10.1093/bioinformatics/bti263](https://academic.oup.com/bioinformatics/article-lookup/doi/10.1093/bioinformatics/bti263).
- 714 Albalat R, Cañestro C. 2016. Evolution by gene loss. *Nat Rev Genet* **17**: 379–391.  
715 <http://www.nature.com/doifinder/10.1038/nrg.2016.39>.
- 716 Andrews S. 2010. FastQC: a quality control tool for high throughput sequence data.  
717 <http://www.bioinformatics.babraham.ac.uk/projects/fastqc>.
- 718 Auger H, Sasakura Y, Joly J-S, Jeffery WR. 2010. Regeneration of oral siphon pigment organs in  
719 the ascidian *Ciona intestinalis*. *Dev Biol* **339**: 374–389.  
720 <http://linkinghub.elsevier.com/retrieve/pii/S0012160609014651>.
- 721 Ballarin L, Franchini A, Ottaviani E, Sabbadin A. 2001. Morula cells as the major  
722 immunomodulatory hemocytes in ascidians: Evidences from the colonial species *Botryllus*  
723 *schlosseri*. *Biol Bull* **201**: 59–64.
- 724 Belyaeva O V., Chang C, Berlett MC, Kedishvili NY. 2015. Evolutionary origins of retinoid active  
725 short-chain dehydrogenases/reductases of SDR16C family. *Chem Biol Interact* **234**: 135–143.  
726 <http://linkinghub.elsevier.com/retrieve/pii/S000927971400324X>.
- 727 Belyaeva O V., Lee S-A, Kolupaev O V., Kedishvili NY. 2009. Identification and characterization  
728 of retinoid-active short-chain dehydrogenases/reductases in *Drosophila melanogaster*. *Biochim*  
729 *Biophys Acta - Gen Subj* **1790**: 1266–1273.  
730 <http://linkinghub.elsevier.com/retrieve/pii/S0304416509001688>.
- 731 Berna L, Alvarez-Valin F. 2014. Evolutionary genomics of fast evolving tunicates. *Genome Biol*  
732 *Evol* **6**: 1724–1738. <https://academic.oup.com/gbe/article-lookup/doi/10.1093/gbe/evu122>.
- 733 Berrill NJ. 1951. Regeneration and Budding in Tunicates. *Biol Rev* **26**: 456–475.  
734 <http://doi.wiley.com/10.1111/j.1469-185X.1951.tb01207.x>.
- 735 Berrill NJ. 1947. The developmental cycle of *Botrylloides*. *Q J Microsc Sci* **88**: 393–407.
- 736 Berrill NJ. 1941. The development of the bud in *Botryllus*. *Biol Bull* **80**: 169.  
737 <http://www.jstor.org/stable/1537595?origin=crossref>.
- 738 Bock DG, MacIsaac HJ, Cristescu ME. 2012. Multilocus genetic analyses differentiate between  
739 widespread and spatially restricted cryptic species in a model ascidian. *Proc R Soc B Biol Sci*  
740 **279**: 2377–2385. <http://rspb.royalsocietypublishing.org/cgi/doi/10.1098/rspb.2011.2610>.
- 741 Bolger AM, Lohse M, Usadel B. 2014. Trimmomatic: a flexible trimmer for Illumina sequence  
742 data. *Bioinformatics* **30**: 2114–2120.  
743 <http://bioinformatics.oxfordjournals.org/cgi/doi/10.1093/bioinformatics/btu170>.
- 744 Bostock M, Ogievetsky V, Heer J. 2011. D3: Data-Driven Documents. *IEEE Trans Vis Comput*  
745 *Graph*. <http://vis.stanford.edu/papers/d3>.
- 746 Bradnam KR, Fass JN, Alexandrov A, Baranay P, Bechner M, Birol I, Boisvert S, Chapman JA,  
747 Chapuis G, Chikhi R, et al. 2013. Assemblathon 2: evaluating de novo methods of genome  
748 assembly in three vertebrate species. *Gigascience* **2**: 10.  
749 <http://www.gigasciencejournal.com/content/2/1/10>.
- 750 Brown FD, Swalla BJ. 2012. Evolution and development of budding by stem cells: Ascidian  
751 coloniality as a case study. *Dev Biol* **369**: 151–162.  
752 <http://dx.doi.org/10.1016/j.ydbio.2012.05.038>.
- 753 Brozovic M, Martin C, Dantec C, Dauga D, Mendez M, Simion P, Percher M, Laporte B,  
754 Scornavacca C, Di Gregorio A, et al. 2016. ANISEED 2015: A digital framework for the  
755 comparative developmental biology of ascidians. *Nucleic Acids Res* **44**: D808–D818.
- 756 Brunetti R. 1976. Biological cycle of *Botrylloides leachi* (Savigny) (Ascidacea) in the Venetian  
757 lagoon. *Vie Milieu* **XXVI**: 105–122.
- 758 Brunetti R. 1974. *Observations on the Life Cycle of Botryllus Schlosseri (Pallas) (Ascidacea) in*

- 759 *the Venetian Lagoon*. <http://www.tandfonline.com/doi/abs/10.1080/11250007409430119>.
- 760 Brunetti R, Beghi L, Bressan M, Marin M. 1980. Combined effects of temperature and salinity on  
761 colonies of *Botryllus schlosseri* and *Botrylloides leachi* (Ascidiacea) from the Venetian  
762 Lagoon. *Mar Ecol Prog Ser* **2**: 303–314. [http://www.int-](http://www.int-res.com/articles/meps/2/m002p303.pdf)  
763 [res.com/articles/meps/2/m002p303.pdf](http://www.int-res.com/articles/meps/2/m002p303.pdf).
- 764 Brunetti R, Gissi C, Pennati R, Caicci F, Gasparini F, Manni L. 2015. Morphological evidence that  
765 the molecularly determined *Ciona intestinalis* type A and type B are different species: *Ciona*  
766 *robusta* and *Ciona intestinalis*. *J Zool Syst Evol Res* **53**: 186–193.  
767 <http://doi.wiley.com/10.1111/jzs.12101>.
- 768 Burighel P, Brunetti R, Zaniolo G. 1976. Hibernation of the colonial ascidian *Botrylloides leachi*  
769 (Savigny): histological observations. *Ital J Zool* **43**: 293–301.
- 770 Camacho C, Coulouris G, Avagyan V, Ma N, Papadopoulos J, Bealer K, Madden TL. 2009.  
771 BLAST+: architecture and applications. *BMC Bioinformatics* **10**: 421.  
772 <http://www.ncbi.nlm.nih.gov/pubmed/20003500>.
- 773 Cañestro C, Bassham S, Postlethwait J. 2005. Development of the central nervous system in the  
774 larvacean *Oikopleura dioica* and the evolution of the chordate brain. *Dev Biol* **285**: 298–315.  
775 <http://linkinghub.elsevier.com/retrieve/pii/S0012160605004410>.
- 776 Canestro C, Postlethwait JH, Gonzalez-Duarte R, Albalat R. 2006. Is retinoic acid genetic  
777 machinery a chordate innovation? *Evol Dev* **8**: 394–406. [http://doi.wiley.com/10.1111/j.1525-](http://doi.wiley.com/10.1111/j.1525-142X.2006.00113.x)  
778 [142X.2006.00113.x](http://doi.wiley.com/10.1111/j.1525-142X.2006.00113.x).
- 779 Chikhi R, Medvedev P. 2014. Informed and automated k-mer size selection for genome assembly.  
780 *Bioinformatics* **30**: 31–37.  
781 <http://bioinformatics.oxfordjournals.org/cgi/doi/10.1093/bioinformatics/btt310>.
- 782 Chillakuri CR, Sheppard D, Lea SM, Handford PA. 2012. Notch receptor–ligand binding and  
783 activation: Insights from molecular studies. *Semin Cell Dev Biol* **23**: 421–428.  
784 <http://linkinghub.elsevier.com/retrieve/pii/S1084952112000134>.
- 785 Cunningham TJ, Duester G. 2015. Mechanisms of retinoic acid signalling and its roles in organ and  
786 limb development. *Nat Rev Mol Cell Biol* **16**: 110–123.  
787 <http://www.nature.com/doi/finder/10.1038/nrm3932>.
- 788 Dehal P, Satou Y, Campbell RK, Chapman J, Degnan B, De Tomaso A, Davidson B, Di Gregorio  
789 A, Gelpke M, Goodstein DM, et al. 2002a. The Draft Genome of *Ciona intestinalis*: Insights  
790 into Chordate and Vertebrate Origins. *Science (80- )* **298**: 2157–2167.  
791 <http://www.sciencemag.org/content/298/5601/2157.abstract>.
- 792 Dehal P, Satou Y, Campbell RK, Chapman J, Degnan B, De Tomaso AW, Davidson B, Di Gregorio  
793 A, Gelpke M, Goodstein DM, et al. 2002b. The draft genome of *Ciona intestinalis*: insights  
794 into chordate and vertebrate origins. *Science* **298**: 2157–67.  
795 <http://www.ncbi.nlm.nih.gov/pubmed/12481130> (Accessed August 25, 2014).
- 796 Delcher AL, Harmon D, Kasif S, White O, Salzberg SL. 1999. Improved microbial gene  
797 identification with GLIMMER. *Nucleic Acids Res* **27**: 4636–41.  
798 <http://www.ncbi.nlm.nih.gov/pubmed/10556321>.
- 799 Delsuc F, Brinkmann H, Chourrout D, Philippe H. 2006. Tunicates and not cephalochordates are  
800 the closest living relatives of vertebrates. *Nature* **439**: 965–968.  
801 <http://www.ncbi.nlm.nih.gov/pubmed/16495997> (Accessed July 10, 2014).
- 802 Dobin A, Davis C a, Schlesinger F, Drenkow J, Zaleski C, Jha S, Batut P, Chaisson M, Gingeras  
803 TR. 2013. STAR: ultrafast universal RNA-seq aligner. *Bioinformatics* **29**: 15–21.  
804 <http://www.pubmedcentral.nih.gov/articlerender.fcgi?artid=3530905&tool=pmcentrez&render>  
805 [type=abstract](http://www.pubmedcentral.nih.gov/articlerender.fcgi?artid=3530905&tool=pmcentrez&render).
- 806 Eden E, Navon R, Steinfeld I, Lipson D, Yakhini Z. 2009. GOrilla: a tool for discovery and  
807 visualization of enriched GO terms in ranked gene lists. *BMC Bioinformatics* **10**: 48.  
808 <http://www.biomedcentral.com/1471-2105/10/48>.



- 809 Edvardsen RB, Seo H-C, Jensen MF, Mialon A, Mikhaleva J, Bjordal M, Cartry J, Reinhardt R,  
810 Weissenbach J, Wincker P, et al. 2005. Remodelling of the homeobox gene complement in the  
811 tunicate *Oikopleura dioica*. *Curr Biol* **15**: R12–R13.  
812 <http://linkinghub.elsevier.com/retrieve/pii/S096098220400973X>.
- 813 Ewels P, Magnusson M, Lundin S, Källér M. 2016. MultiQC: Summarize analysis results for  
814 multiple tools and samples in a single report. *Bioinformatics* **btw354**.
- 815 Franchi N, Schiavon F, Carletto M, Gasparini F, Bertoloni G, Tosatto SCE, Ballarin L. 2011.  
816 Immune roles of a rhamnose-binding lectin in the colonial ascidian *Botryllus schlosseri*.  
817 *Immunobiology* **216**: 725–736.  
818 <http://linkinghub.elsevier.com/retrieve/pii/S0171298510001993>.
- 819 Garcia-Fernández J. 2005. The genesis and evolution of homeobox gene clusters. *Nat Rev Genet* **6**:  
820 881–92. <http://www.ncbi.nlm.nih.gov/pubmed/16341069>.
- 821 Gasparini F, Burighel P, Manni L, Zaniolo G. 2008. Vascular regeneration and angiogenic-like  
822 sprouting mechanism in a compound ascidian is similar to vertebrates. *Evol Dev* **10**: 591–605.
- 823 Gazave E, Lapébie P, Richards GS, Brunet F, Ereskovsky A V, Degnan BM, Borchiellini C,  
824 Vervoort M, Renard E. 2009. Origin and evolution of the Notch signalling pathway: an  
825 overview from eukaryotic genomes. *BMC Evol Biol* **9**: 249.  
826 <http://bmcevolbiol.biomedcentral.com/articles/10.1186/1471-2148-9-249>.
- 827 Gissi C, Hastings KEM, Gasparini F, Stach T, Pennati R, Manni L. 2017. An unprecedented  
828 taxonomic revision of a model organism: the paradigmatic case of *Ciona robusta* and *Ciona*  
829 *intestinalis*. *Zool Scr*. <http://doi.wiley.com/10.1111/zsc.12233>.
- 830 Gnerre S, MacCallum I, Przybylski D, Ribeiro FJ, Burton JN, Walker BJ, Sharpe T, Hall G, Shea  
831 TP, Sykes S, et al. 2011. High-quality draft assemblies of mammalian genomes from  
832 massively parallel sequence data. *Proc Natl Acad Sci* **108**: 1513–1518.  
833 <http://www.pnas.org/cgi/doi/10.1073/pnas.1017351108>.
- 834 Griggio F, Voskoboinik A, Iannelli F, Justy F, Tilak M-KM-K, Xavier T, Pesole G, Douzery EJP,  
835 Mastrototaro F, Gissi C. 2014. Ascidian Mitogenomics: Comparison of Evolutionary Rates in  
836 Closely Related Taxa Provides Evidence of Ongoing Speciation Events. *Genome Biol Evol* **6**:  
837 591–605. <https://academic.oup.com/gbe/article-lookup/doi/10.1093/gbe/evu041>.
- 838 Grigoriev I V., Nordberg H, Shabalov I, Aerts A, Cantor M, Goodstein D, Kuo A, Minovitsky S,  
839 Nikitin R, Ohm RA, et al. 2012. The Genome Portal of the Department of Energy Joint  
840 Genome Institute. *Nucleic Acids Res* **40**: D26–D32. <https://academic.oup.com/nar/article-lookup/doi/10.1093/nar/gkr947>.
- 842 Guder C, Philipp I, Lengfeld T, Watanabe H, Hobmayer B, Holstein TW. 2006. The Wnt code:  
843 cnidarians signal the way. *Oncogene* **25**: 7450–7460.  
844 <http://www.nature.com/doi/finder/10.1038/sj.onc.1210052>.
- 845 Guindon S, Dufayard JF, Lefort V, Anisimova M, Hordijk W, Gascuel O. 2010. New Algorithms  
846 and Methods to Estimate Maximum-Likelihood Phylogenies: Assessing the Performance of  
847 PhyML 3.0. *Syst Biol* **59**: 307–321. <https://academic.oup.com/sysbio/article-lookup/doi/10.1093/sysbio/syq010>.
- 849 Guruharsha KG, Kankel MW, Artavanis-Tsakonas S. 2012. The Notch signalling system: recent  
850 insights into the complexity of a conserved pathway. *Nat Rev Genet* **13**: 654–666.  
851 <http://www.nature.com/doi/finder/10.1038/nrg3272>.
- 852 Gutierrez S, Brown FD. 2017. Vascular budding in *Symplegma brakenhielmi* and the evolution of  
853 coloniality in styelid ascidians. *Dev Biol* **423**: 152–169.  
854 <http://dx.doi.org/10.1016/j.ydbio.2017.01.012>.
- 855 Hamada M, Goricki S, Byerly MS, Satoh N, Jeffery WR. 2015. Evolution of the chordate  
856 regeneration blastema: Differential gene expression and conserved role of notch signaling  
857 during siphon regeneration in the ascidian *Ciona*. *Dev Biol* **405**: 304–315.  
858 <http://linkinghub.elsevier.com/retrieve/pii/S0012160615300701>.

- 859 Hoegg S, Meyer A. 2005. Hox clusters as models for vertebrate genome evolution. *Trends Genet*  
860 **21**: 421–424. <http://linkinghub.elsevier.com/retrieve/pii/S0168952505001654>.
- 861 Holt C, Yandell M. 2011. MAKER2: an annotation pipeline and genome-database management tool  
862 for second-generation genome projects. *BMC Bioinformatics* **12**: 491.
- 863 Ikuta T, Satoh N, Saiga H. 2010. Limited functions of Hox genes in the larval development of the  
864 ascidian *Ciona intestinalis*. *Development* **137**: 1505–1513.  
865 <http://dev.biologists.org/cgi/doi/10.1242/dev.046938>.
- 866 Iwasa T, Mishima S, Watari A, Ohkuma M, Azuma T, Kanehara K, Tsuda M. 2003. A novel G  
867 protein alpha subunit in embryo of the ascidian, *Halocynthia roretzi*. *Zoolog Sci* **20**: 141–51.  
868 <http://www.ncbi.nlm.nih.gov/pubmed/12655177>.
- 869 Jackson B, Brocker C, Thompson DC, Black W, Vasiliou K, Nebert DW, Vasiliou V. 2011. Update  
870 on the aldehyde dehydrogenase gene (ALDH) superfamily. *Hum Genomics* **5**: 283–303.  
871 <http://www.ncbi.nlm.nih.gov/pubmed/21712190>.
- 872 Janssen R, Le Gouar M, Pechmann M, Poulin F, Bolognesi R, Schwager EE, Hopfen C, Colbourne  
873 JK, Budd GE, Brown SJ, et al. 2010. Conservation, loss, and redeployment of Wnt ligands in  
874 protostomes: implications for understanding the evolution of segment formation. *BMC Evol*  
875 *Biol* **10**: 374. <http://bmcevolbiol.biomedcentral.com/articles/10.1186/1471-2148-10-374>.
- 876 Jeanmougin F, Thompson JD, Gouy M, Higgins DG, Gibson TJ. 1998. Multiple sequence  
877 alignment with Clustal X. *Trends Biochem Sci* **23**: 403–5.  
878 <http://www.ncbi.nlm.nih.gov/pubmed/9810230>.
- 879 Jeffery WR. 2015. Regeneration, Stem Cells, and Aging in the Tunicate *Ciona*: Insights from the  
880 Oral Siphon. *Int Rev Cell Mol Biol* **319**: 255–82.  
881 <http://linkinghub.elsevier.com/retrieve/pii/S1937644815000581>.
- 882 Jones P, Binns D, Chang HY, Fraser M, Li W, McAnulla C, McWilliam H, Maslen J, Mitchell A,  
883 Nuka G, et al. 2014. InterProScan 5: Genome-scale protein function classification.  
884 *Bioinformatics* **30**: 1236–1240.
- 885 Kent WJ. 2002. BLAT--the BLAST-like alignment tool. *Genome Res* **12**: 656–64.  
886 <http://www.ncbi.nlm.nih.gov/pubmed/11932250>.
- 887 Korf I. 2004. Gene finding in novel genomes. *BMC Bioinformatics* **5**: 59.
- 888 Kürn U, Rendulic S, Tiozzo S, Lauzon RJ. 2011. Asexual propagation and regeneration in colonial  
889 ascidians. *Biol Bull* **221**: 43–61. <http://www.ncbi.nlm.nih.gov/pubmed/21876110>.
- 890 Kusserow A, Pang K, Sturm C, Hroudá M, Lentfer J, Schmidt HA, Technau U, von Haeseler A,  
891 Hobmayer B, Martindale MQ, et al. 2005. Unexpected complexity of the Wnt gene family in a  
892 sea anemone. *Nature* **433**: 156–160. <http://www.nature.com/doi/10.1038/nature03158>.
- 893 Lauzon RJ, Brown C, Kerr L, Tiozzo S. 2013. Phagocyte dynamics in a highly regenerative  
894 urochordate: insights into development and host defense. *Dev Biol* **374**: 357–73.  
895 <http://www.ncbi.nlm.nih.gov/pubmed/23174529> (Accessed March 31, 2014).
- 896 Lee S-A, Belyaeva O V., Kedishvili NY. 2009. Biochemical characterization of human epidermal  
897 retinol dehydrogenase 2. *Chem Biol Interact* **178**: 182–7.  
898 <http://www.ncbi.nlm.nih.gov/pubmed/18926804>.
- 899 Lemaire P, Smith WC, Nishida H. 2008. Ascidians and the plasticity of the chordate developmental  
900 program. *Curr Biol* **18**: R620-31. <http://www.ncbi.nlm.nih.gov/pubmed/18644342>.
- 901 Li L, Stoeckert CJ, Roos DS. 2003. OrthoMCL: identification of ortholog groups for eukaryotic  
902 genomes. *Genome Res* **13**: 2178–89. <http://www.genome.org/cgi/doi/10.1101/gr.1224503>.
- 903 Loh KM, van Amerongen R, Nusse R. 2016. Generating Cellular Diversity and Spatial Form: Wnt  
904 Signaling and the Evolution of Multicellular Animals. *Dev Cell* **38**: 643–655.  
905 <http://linkinghub.elsevier.com/retrieve/pii/S153458071630586X>.
- 906 Lowe TM. 1999. A Computational Screen for Methylation Guide snoRNAs in Yeast. *Science (80- )*  
907 **283**: 1168–1171. <http://www.sciencemag.org/cgi/doi/10.1126/science.283.5405.1168>.
- 908 Lowe TM, Eddy SR. 1997. tRNAscan-SE: A program for improved detection of transfer RNA

- 909 genes in genomic sequence. *Nucleic Acids Res* **25**: 955–964.
- 910 Luke GN, Castro LFC, McLay K, Bird C, Coulson A, Holland PWH. 2003. Dispersal of NK  
911 homeobox gene clusters in amphioxus and humans. *Proc Natl Acad Sci* **100**: 5292–5295.  
912 <http://www.pnas.org/cgi/doi/10.1073/pnas.0836141100>.
- 913 Luo R, Liu B, Xie Y, Li Z, Huang W, Yuan J, He G, Chen Y, Pan Q, Liu Y, et al. 2012.  
914 SOAPdenovo2: an empirically improved memory-efficient short-read de novo assembler.  
915 *Gigascience* **1**: 18. <http://www.gigasciencejournal.com/content/1/1/18>.
- 916 MacDonald BT, Tamai K, He X. 2009. Wnt/ $\beta$ -Catenin Signaling: Components, Mechanisms, and  
917 Diseases. *Dev Cell* **17**: 9–26. <http://linkinghub.elsevier.com/retrieve/pii/S1534580709002573>.
- 918 Manni L, Zaniolo G, Cima F, Burighel P, Ballarin L. 2007. *Botryllus schlosseri*: a model ascidian  
919 for the study of asexual reproduction. *Dev Dyn* **236**: 335–52.  
920 <http://www.ncbi.nlm.nih.gov/pubmed/17191252> (Accessed March 31, 2014).
- 921 Martí-Solans J, Belyaeva O V., Torres-Aguila NP, Kedishvili NY, Albalat R, Cañestro C. 2016.  
922 Coelimitation and Survival in Gene Network Evolution: Dismantling the RA-Signaling in a  
923 Chordate. *Mol Biol Evol* **33**: 2401–2416. [https://academic.oup.com/mbe/article-](https://academic.oup.com/mbe/article-lookup/doi/10.1093/molbev/msw118)  
924 [lookup/doi/10.1093/molbev/msw118](https://academic.oup.com/mbe/article-lookup/doi/10.1093/molbev/msw118).
- 925 Martin A, Maher S, Summerhurst K, Davidson D, Murphy P. 2012. Differential deployment of  
926 paralogous Wnt genes in the mouse and chick embryo during development. *Evol Dev* **14**: 178–  
927 195. <http://doi.wiley.com/10.1111/j.1525-142X.2012.00534.x>.
- 928 Maumus F, Quesneville H. 2014. Ancestral repeats have shaped epigenome and genome  
929 composition for millions of years in *Arabidopsis thaliana*. *Nat Commun* **5**.  
930 <http://www.nature.com/doi/finder/10.1038/ncomms5104>.
- 931 Millar RH. 1971. The biology of ascidians. *Adv Mar Biol* **9**: 1–100.
- 932 Mukai H, Sugimoto K, Taneda Y. 1978. Comparative studies on the circulatory system of the  
933 compound ascidians, *Botryllus*, *Botrylloides* and *Symplegma*. *J Morphol* **157**: 49–78.
- 934 Murata Y, Okado H, Kubo Y. 2001. Characterization of heteromultimeric G protein-coupled  
935 inwardly rectifying potassium channels of the tunicate tadpole with a unique pore property. *J*  
936 *Biol Chem* **276**: 18529–39. <http://www.ncbi.nlm.nih.gov/pubmed/11278535>.
- 937 Nawrocki EP, Burge SW, Bateman A, Daub J, Eberhardt RY, Eddy SR, Floden EW, Gardner PP,  
938 Jones TA, Tate J, et al. 2015. Rfam 12.0: Updates to the RNA families database. *Nucleic Acids*  
939 *Res* **43**: D130–D137.
- 940 Nawrocki EP, Eddy SR. 2013. Infernal 1.1: 100-fold faster RNA homology searches.  
941 *Bioinformatics* **29**: 2933–2935.
- 942 NCBI Resource Coordinators. 2016. Database resources of the National Center for Biotechnology  
943 Information. *Nucleic Acids Res* **44**: D7–19. <http://www.ncbi.nlm.nih.gov/pubmed/26615191>.
- 944 Nishida H. 2005. Specification of embryonic axis and mosaic development in ascidians. *Dev Dyn*  
945 **233**: 1177–1193. <http://doi.wiley.com/10.1002/dvdy.20469>.
- 946 Nydam ML, Giesbrecht KB, Stephenson EE. 2017. Origin and Dispersal History of Two Colonial  
947 Ascidian Clades in the *Botryllus schlosseri* Species Complex ed. T.-Y. Chiang. *PLoS One* **12**:  
948 e0169944. <http://dx.plos.org/10.1371/journal.pone.0169944>.
- 949 O’Connell J, Schulz-Trieglaff O, Carlson E, Hims MM, Gormley N a., Cox a. J. 2015. NxTrim:  
950 optimized trimming of Illumina mate pair reads. *Bioinformatics* **31**: btv057.  
951 [http://bioinformatics.oxfordjournals.org/content/early/2015/02/05/bioinformatics.btv057.short?](http://bioinformatics.oxfordjournals.org/content/early/2015/02/05/bioinformatics.btv057.short?rss=1)  
952 [rss=1](http://bioinformatics.oxfordjournals.org/content/early/2015/02/05/bioinformatics.btv057.short?rss=1).
- 953 O’Neill RJ, O’Neill MJ, Graves JA. 1998. Undermethylation associated with retroelement  
954 activation and chromosome remodelling in an interspecific mammalian hybrid. *Nature* **393**:  
955 68–72. <http://www.nature.com/doi/finder/10.1038/29985>.
- 956 Oka H, Watanabe H. 1957. Vascular budding, a new type of budding in *Botryllus*. *Biol Bull* **112**:  
957 225. <http://www.jstor.org/stable/10.2307/1539200?origin=crossref>.
- 958 Pascual-Anaya J, D’Aniello S, Kuratani S, Garcia-Fernández J. 2013. Evolution of Hox gene

- 959 clusters in deuterostomes. *BMC Dev Biol* **13**: 26.  
960 <http://bmcdevbiol.biomedcentral.com/articles/10.1186/1471-213X-13-26>.
- 961 Pearson JC, Lemons D, McGinnis W. 2005. Modulating Hox gene functions during animal body  
962 patterning. *Nat Rev Genet* **6**: 893–904. <http://www.ncbi.nlm.nih.gov/pubmed/16341070>.
- 963 Philips A, Blein M, Robert A, Chambon J-P, Baghdiguian S, Weill M, Fort P. 2003. Ascidiaceans as a  
964 vertebrate-like model organism for physiological studies of Rho GTPase signaling. *Biol cell*  
965 **95**: 295–302. <http://www.ncbi.nlm.nih.gov/pubmed/12941527>.
- 966 Piette J, Lemaire P. 2015. Thaliaceans, The Neglected Pelagic Relatives of Ascidiaceans: A  
967 Developmental and Evolutionary Enigma. *Q Rev Biol* **90**: 117–145.  
968 <http://www.journals.uchicago.edu/doi/10.1086/669266>.
- 969 Primmer CR, Papakostas S, Leder EH, Davis MJ, Ragan MA. 2013. Annotated genes and  
970 nonannotated genomes: cross-species use of Gene Ontology in ecology and evolution research.  
971 *Mol Ecol* **22**: 3216–3241. <http://doi.wiley.com/10.1111/mec.12309>.
- 972 Priyam A, Woodcroft BJ, Rai V, Munagala A, Moghul I, Ter F, Gibbins MA, Moon H, Leonard G,  
973 Rumpf W, et al. 2015. Sequenceserver: a modern graphical user interface for custom BLAST  
974 databases. *bioRxiv*. <http://biorxiv.org/content/early/2015/11/27/033142.abstract>.
- 975 Prud'homme B, Lartillot N, Balavoine G, Adoutte A, Vervoort M. 2002. Phylogenetic analysis of  
976 the Wnt gene family. Insights from lophotrochozoan members. *Curr Biol* **12**: 1395.  
977 <http://www.sciencedirect.com/science/article/pii/S0960982202010680>.
- 978 Rambaut A. 2016. FigTree. <http://tree.bio.ed.ac.uk/software/figtree/>.
- 979 Rinkevich B, Shlemberg Z, Fishelson L. 1995. Whole-body protochordate regeneration from  
980 totipotent blood cells. *Proc Natl Acad Sci U S A* **92**: 7695–9.  
981 <http://www.pubmedcentral.nih.gov/articlerender.fcgi?artid=41212&tool=pmcentrez&rendertype=abstract> (Accessed March 31, 2014).
- 982 Rinkevich Y, Douek J, Haber O, Rinkevich B, Reshef R. 2007a. Urochordate whole body  
983 regeneration inaugurates a diverse innate immune signaling profile. *Dev Biol* **312**: 131–46.  
984 <http://www.ncbi.nlm.nih.gov/pubmed/17964563> (Accessed March 31, 2014).
- 985 Rinkevich Y, Paz G, Rinkevich B, Reshef R. 2007b. Systemic bud induction and retinoic acid  
986 signaling underlie whole body regeneration in the urochordate *Botrylloides leachi*. *PLoS Biol*  
987 **5**: e71.  
988 <http://www.pubmedcentral.nih.gov/articlerender.fcgi?artid=1808485&tool=pmcentrez&render>  
989 [type=abstract](http://www.pubmedcentral.nih.gov/articlerender.fcgi?artid=1808485&tool=pmcentrez&render) (Accessed March 31, 2014).
- 990 Rinkevich Y, Rinkevich B, Reshef R. 2008. Cell signaling and transcription factor genes expressed  
991 during whole body regeneration in a colonial chordate. *BMC Dev Biol* **8**: 100.  
992 <http://www.pubmedcentral.nih.gov/articlerender.fcgi?artid=2576188&tool=pmcentrez&render>  
993 [type=abstract](http://www.pubmedcentral.nih.gov/articlerender.fcgi?artid=2576188&tool=pmcentrez&render) (Accessed March 20, 2014).
- 994 Rinkevich Y, Voskoboinik A, Rosner A, Rabinowitz C, Paz G, Oren M, Douek J, Alfassi G,  
995 Moiseeva E, Ishizuka KJ, et al. 2013. Repeated, long-term cycling of putative stem cells  
996 between niches in a basal chordate. *Dev Cell* **24**: 76–88.  
997 <http://www.pubmedcentral.nih.gov/articlerender.fcgi?artid=3810298&tool=pmcentrez&render>  
998 [type=abstract](http://www.pubmedcentral.nih.gov/articlerender.fcgi?artid=3810298&tool=pmcentrez&render) (Accessed March 30, 2014).
- 1000 Ronquist F, Huelsenbeck JP. 2003. MrBayes 3: Bayesian phylogenetic inference under mixed  
1001 models. *Bioinformatics* **19**: 1572–4. <http://www.ncbi.nlm.nih.gov/pubmed/12912839>.
- 1002 Ross AC, Zolfaghari R. 2011. Cytochrome P450s in the regulation of cellular retinoic acid  
1003 metabolism. *Annu Rev Nutr* **31**: 65–87. <http://www.ncbi.nlm.nih.gov/pubmed/21529158>.
- 1004 Rubinstein ND, Feldstein T, Shenkar N, Botero-Castro F, Griggio F, Mastrototaro F, Delsuc F,  
1005 Douzery EJP, Gissi C, Huchon D. 2013. Deep sequencing of mixed total DNA without  
1006 barcodes allows efficient assembly of highly plastic Ascidian mitochondrial genomes. *Genome*  
1007 *Biol Evol* **5**: 1185–1199. <http://www.ncbi.nlm.nih.gov/pubmed/23709623>.
- 1008 Sabbadin A, Zaniolo G, Majone F. 1975. Determination of polarity and bilateral asymmetry in



- 1009       palleal and vascular buds of the ascidian *Botryllus schlosseri*. *Dev Biol* **46**: 79–87.
- 1010   Saito Y, Shirae M, Okuyama M, Cohen S. 2001. Phylogeny of Botryllid Ascidians. In *The Biology*  
1011       *of Ascidians*, pp. 315–320, Springer Japan, Tokyo [http://link.springer.com/10.1007/978-4-431-](http://link.springer.com/10.1007/978-4-431-66982-1_50)  
1012       66982-1\_50.
- 1013   Santagati F, Abe K, Schmidt V, Schmitt-John T, Suzuki M, Yamamura K-I, Imai K. 2003.  
1014       Identification of Cis-regulatory elements in the mouse Pax9/Nkx2-9 genomic region:  
1015       implication for evolutionary conserved synteny. *Genetics* **165**: 235–42.  
1016       <http://www.ncbi.nlm.nih.gov/pubmed/14504231>.
- 1017   Sattler S. 2017. The Role of the Immune System Beyond the Fight Against Infection. In *The*  
1018       *Immunology of Cardiovascular Homeostasis and Pathology* (eds. S. Sattler and T. Kennedy-  
1019       Lydon), pp. 3–14, Springer International Publishing [http://link.springer.com/10.1007/978-3-](http://link.springer.com/10.1007/978-3-319-57613-8_1)  
1020       319-57613-8\_1.
- 1021   Savigny J-C. 1816. *Mémoires sur les animaux sans vertèbres*. Dufour, G., Paris  
1022       <http://www.biodiversitylibrary.org/bibliography/9154>.
- 1023   Seo H-CC, Kube M, Edvardsen RB, Jensen MF, Beck A, Spriet E, Gorsky G, Thompson EM,  
1024       Lehrach H, Reinhardt R, et al. 2001. Miniature genome in the marine chordate *Oikopleura*  
1025       *dioica*. *Science* **294**: 2506. <http://www.sciencemag.org/content/294/5551/2506.short>.
- 1026   Simakov O, Kawashima T, Marlétaz F, Jenkins J, Koyanagi R, Mitros T, Hisata K, Bredeson J,  
1027       Shoguchi E, Gyoja F, et al. 2015. Hemichordate genomes and deuterostome origins. *Nature*  
1028       **527**: 459–465. <http://www.nature.com/doi/10.1038/nature16150>.
- 1029   Simão FA, Waterhouse RM, Ioannidis P, Kriventseva E V. 2015. BUSCO : assessing genome  
1030       assembly and annotation completeness with single-copy orthologs. *Genome Anal* **9**–10.
- 1031   Simmen MW, Leitgeb S, Charlton J, Jones SJ, Harris BR, Clark VH, Bird A. 1999. Nonmethylated  
1032       transposable elements and methylated genes in a chordate genome. *Science* **283**: 1164–7.  
1033       <http://www.ncbi.nlm.nih.gov/pubmed/10024242>.
- 1034   Simpson JT. 2014. Exploring genome characteristics and sequence quality without a reference.  
1035       *Bioinformatics* **30**: 1228–1235.
- 1036   Simpson JT, Wong K, Jackman SD, Schein JE, Jones SJM, Birol I. 2009. ABySS: A parallel  
1037       assembler for short read sequence data. *Genome Res* **19**: 1117–1123.  
1038       <http://genome.cshlp.org/cgi/doi/10.1101/gr.089532.108>.
- 1039   Small KS, Brudno M, Hill MM, Sidow A. 2007. A haplome alignment and reference sequence of  
1040       the highly polymorphic *Ciona savignyi* genome. *Genome Biol* **8**: R41.  
1041       <http://genomebiology.biomedcentral.com/articles/10.1186/gb-2007-8-3-r41>.
- 1042   Smit A, Hubley R. 2015. RepeatModeler Open-1.0.
- 1043   Smit A, Hubley R, Green P. 2015. RepeatMasker Open-4.0.
- 1044   Sobreira TJP, Marletaz F, Simoes-Costa M, Schechtman D, Pereira AC, Brunet F, Sweeney S, Pani  
1045       A, Aronowicz J, Lowe CJ, et al. 2011. Structural shifts of aldehyde dehydrogenase enzymes  
1046       were instrumental for the early evolution of retinoid-dependent axial patterning in metazoans.  
1047       *Proc Natl Acad Sci* **108**: 226–231. <http://www.pnas.org/cgi/doi/10.1073/pnas.1011223108>.
- 1048   Somorjai IML, Escrivà H, Garcia-Fernández J. 2012. Amphioxus makes the cut—Again. *Commun*  
1049       *Integr Biol* **5**: 499–502. <http://www.tandfonline.com/doi/abs/10.4161/cib.21075>.
- 1050   Spagnuolo A, Ristatore F, Di Gregorio A, Aniello F, Branno M, Di Lauro R. 2003. Unusual  
1051       number and genomic organization of Hox genes in the tunicate *Ciona intestinalis*. *Gene* **309**:  
1052       71–9. <http://www.ncbi.nlm.nih.gov/pubmed/12758123>.
- 1053   Stanke M, Waack S. 2003. Gene prediction with a hidden Markov model and a new intron  
1054       submodel. *Bioinformatics* **19**: 215–225.
- 1055   Stapley J, Santure AW, Dennis SR. 2015. Transposable elements as agents of rapid adaptation may  
1056       explain the genetic paradox of invasive species. *Mol Ecol* **24**: 2241–2252.  
1057       <http://doi.wiley.com/10.1111/mec.13089>.
- 1058   Stoick-Cooper CL, Weidinger G, Riehle KJ, Hubbert C, Major MB, Fausto N, Moon RT. 2007.

- 1059 Distinct Wnt signaling pathways have opposing roles in appendage regeneration. *Development*  
1060 **134**: 479–89. <http://dev.biologists.org/cgi/doi/10.1242/dev.001123>.
- 1061 Stolfi A, Lowe EK, Racioppi C, Ristoratore F, Brown CT, Swalla BJ, Christiaen L. 2014. Divergent  
1062 mechanisms regulate conserved cardiopharyngeal development and gene expression in  
1063 distantly related ascidians. *Elife* **3**: e03728.
- 1064 Supek F, Bošnjak M, Škunca N, Šmuc T. 2011. REVIGO Summarizes and Visualizes Long Lists of  
1065 Gene Ontology Terms ed. C. Gibas. *PLoS One* **6**: e21800.  
1066 <http://dx.plos.org/10.1371/journal.pone.0021800>.
- 1067 Suzuki MM, Kerr ARW, De Sousa D, Bird A. 2007. CpG methylation is targeted to transcription  
1068 units in an invertebrate genome. *Genome Res* **17**: 625–631.  
1069 <http://www.genome.org/cgi/doi/10.1101/gr.6163007>.
- 1070 Takatori N, Butts T, Candiani S, Pestarino M, Ferrier DEK, Saiga H, Holland PWH. 2008.  
1071 Comprehensive survey and classification of homeobox genes in the genome of amphioxus,  
1072 *Branchiostoma floridae*. *Dev Genes Evol* **218**: 579–590.  
1073 <http://link.springer.com/10.1007/s00427-008-0245-9>.
- 1074 Taketa DA, Nydam ML, Langenbacher AD, Rodriguez D, Sanders E, De Tomaso AW. 2015.  
1075 Molecular evolution and in vitro characterization of Botryllus histocompatibility factor.  
1076 *Immunogenetics* **67**: 605–623. <http://link.springer.com/10.1007/s00251-015-0870-1>.
- 1077 Tassy O, Dauga D, Daian F, Sobral D, Robin F, Khoueiry P, Salgado D, Fox V, Caillol D, Schiappa  
1078 R, et al. 2010. The ANISEED database: Digital representation, formalization, and elucidation  
1079 of a chordate developmental program. *Genome Res* **20**: 1459–1468.  
1080 <http://genome.cshlp.org/cgi/doi/10.1101/gr.108175.110>.
- 1081 The Gene Ontology Consortium. 2015. Gene Ontology Consortium: going forward. *Nucleic Acids*  
1082 *Res* **43**: D1049–D1056. <https://academic.oup.com/nar/article-lookup/doi/10.1093/nar/gku1179>.
- 1083 Tsagkogeorga G, Cahais V, Galtier N. 2012. The Population Genomics of a Fast Evolver: High  
1084 Levels of Diversity, Functional Constraint, and Molecular Adaptation in the Tunicate *Ciona*  
1085 *intestinalis*. *Genome Biol Evol* **4**: 852–861. <https://academic.oup.com/gbe/article-lookup/doi/10.1093/gbe/evs054>.
- 1086 Tsagkogeorga G, Turon X, Galtier N, Douzery EJP, Delsuc F. 2010. Accelerated Evolutionary Rate  
1087 of Housekeeping Genes in Tunicates. *J Mol Evol* **71**: 153–167.  
1088 <http://link.springer.com/10.1007/s00239-010-9372-9>.
- 1089 UniProt Consortium. 2015. UniProt: a hub for protein information. *Nucleic Acids Res* **43**: D204–  
1090 D212. <https://academic.oup.com/nar/article-lookup/doi/10.1093/nar/gku989>.
- 1091 Voskoboynik A, Neff NF, Sahoo D, Newman AM, Pushkarev D, Koh W, Passarelli B, Fan HC,  
1092 Mantalas GL, Palmeri KJ, et al. 2013a. The genome sequence of the colonial chordate,  
1093 *Botryllus schlosseri*. *Elife* **2**: 1–24. <http://elifesciences.org/lookup/doi/10.7554/eLife.00569>.
- 1094 Voskoboynik A, Newman AM, Corey DM, Sahoo D, Pushkarev D, Neff NF, Passarelli B, Koh W,  
1095 Ishizuka KJ, Palmeri KJ, et al. 2013b. Identification of a Colonial Chordate Histocompatibility  
1096 Gene. *Science (80- )* **341**: 384–387.  
1097 <http://www.sciencemag.org/cgi/doi/10.1126/science.1238036>.
- 1098 Voskoboynik A, Simon-Blecher N, Soen Y, Rinkevich B, De Tomaso AW, Ishizuka KJ, Weissman  
1099 IL. 2007. Striving for normality: whole body regeneration through a series of abnormal  
1100 generations. *FASEB J* **21**: 1335–44. <http://www.ncbi.nlm.nih.gov/pubmed/17289924>  
1101 (Accessed March 31, 2014).
- 1102 Wada S, Tokuoka M, Shoguchi E, Kobayashi K, Di Gregorio A, Spagnuolo A, Branno M, Kohara  
1103 Y, Rokhsar D, Levine M, et al. 2003. A genomewide survey of developmentally relevant genes  
1104 in *Ciona intestinalis*. *Dev Genes Evol* **213**: 222–234. <http://link.springer.com/10.1007/s00427-003-0321-0>.
- 1105 Wang X-P, Suomalainen M, Felszeghy S, Zelarayan LC, Alonso MT, Plikus M V, Maas RL,  
1106 Chuong C-M, Schimmang T, Thesleff I. 2007. An integrated gene regulatory network controls  
1107  
1108

- 1109 stem cell proliferation in teeth. *PLoS Biol* **5**: e159.  
1110 <http://www.pubmedcentral.nih.gov/articlerender.fcgi?artid=1885832&tool=pmcentrez&render>  
1111 [type=abstract](http://www.pubmedcentral.nih.gov/articlerender.fcgi?artid=1885832&tool=pmcentrez&render) (Accessed October 28, 2010).
- 1112 Wences AH, Schatz MC. 2015. Metassembler: merging and optimizing de novo genome  
1113 assemblies. *Genome Biol* **16**: 207. <http://genomebiology.com/2015/16/1/207>.
- 1114 Zerbino DR, Birney E. 2008. Velvet: algorithms for de novo short read assembly using de Bruijn  
1115 graphs. *Genome Res* **18**: 821–9. <http://www.ncbi.nlm.nih.gov/pubmed/18349386>.
- 1116 Zhan A, Briski E, Bock DG, Ghabooli S, MacIsaac HJ. 2015. Ascidiens as models for studying  
1117 invasion success. *Mar Biol* **162**. <http://link.springer.com/10.1007/s00227-015-2734-5>.
- 1118 Zhang G, Fang X, Guo X, Li L, Luo R, Xu F, Yang P, Zhang L, Wang X, Qi H, et al. 2012. The  
1119 oyster genome reveals stress adaptation and complexity of shell formation. *Nature* **490**: 49–54.  
1120 <http://dx.doi.org/10.1038/nature11413>.
- 1121 Zimin A V., Marcais G, Puiu D, Roberts M, Salzberg SL, Yorke JA. 2013. The MaSuRCA genome  
1122 assembler. *Bioinformatics* **29**: 2669–2677.  
1123 <http://bioinformatics.oxfordjournals.org/cgi/doi/10.1093/bioinformatics/btt476>.
- 1124 Zondag LE, Rutherford K, Gemmell NJ, Wilson MJ. 2016. Uncovering the pathways underlying  
1125 whole body regeneration in a chordate model, *Botrylloides leachi* using de novo transcriptome  
1126 analysis. *BMC Genomics* **17**: 114. <http://www.biomedcentral.com/1471-2164/17/114>.  
1127
